# Supplementary material for: Protocol of a scoping review assessing injury rates and their determinants among healthcare workers in western countries
Source: PubMed Central journal article supplement — BMJ Open. 2019 Jan 30;9(1):e023372. doi: 10.1136/bmjopen-2018-023372 (PMC6359735; doi:10.1136/bmjopen-2018-023372), 2019-01-30
Supplement: bmjopen-2018-023372.draft_revisions.pdf [file bmjopen-2018-023372.draft_revisions.pdf]

# BMJ Open

BMJ Open is committed to open peer review. As part of this commitment we make the peer review history of every article we publish publicly available.

When an article is published we post the peer reviewers' comments and the authors' responses online. We also post the versions of the paper that were used during peer review. These are the versions that the peer review comments apply to.

The versions of the paper that follow are the versions that were submitted during the peer review process. They are not the versions of record or the final published versions. They should not be cited or distributed as the published version of this manuscript.

BMJ Open is an open access journal and the full, final, typeset and author-corrected version of record of the manuscript is available on our site with no access controls, subscription charges or pay-per-view fees (<http://bmjopen.bmj.com>).

If you have any questions on BMJ Open's open peer review process please email [editorial.bmjopen@bmj.com](mailto:editorial.bmjopen@bmj.com)

# BMJ Open

## Protocol of a scoping review assessing injury rate and determinants among healthcare workers in Western countries

|                               |                                                                                                                                                                                                                                                                                                                                                                                                                                                                                                                                                                                                                                                                                                                                                                                                                                                                                                                                                                                                                                                                                                                                                                                                                                                                                                                                                                                                                                                                                                                                                                                                                                                                                                                                                                                                                                                                                                                                                                                                                                                            |
|-------------------------------|------------------------------------------------------------------------------------------------------------------------------------------------------------------------------------------------------------------------------------------------------------------------------------------------------------------------------------------------------------------------------------------------------------------------------------------------------------------------------------------------------------------------------------------------------------------------------------------------------------------------------------------------------------------------------------------------------------------------------------------------------------------------------------------------------------------------------------------------------------------------------------------------------------------------------------------------------------------------------------------------------------------------------------------------------------------------------------------------------------------------------------------------------------------------------------------------------------------------------------------------------------------------------------------------------------------------------------------------------------------------------------------------------------------------------------------------------------------------------------------------------------------------------------------------------------------------------------------------------------------------------------------------------------------------------------------------------------------------------------------------------------------------------------------------------------------------------------------------------------------------------------------------------------------------------------------------------------------------------------------------------------------------------------------------------------|
| Journal:                      | <i>BMJ Open</i>                                                                                                                                                                                                                                                                                                                                                                                                                                                                                                                                                                                                                                                                                                                                                                                                                                                                                                                                                                                                                                                                                                                                                                                                                                                                                                                                                                                                                                                                                                                                                                                                                                                                                                                                                                                                                                                                                                                                                                                                                                            |
| Manuscript ID                 | bmjopen-2018-023372                                                                                                                                                                                                                                                                                                                                                                                                                                                                                                                                                                                                                                                                                                                                                                                                                                                                                                                                                                                                                                                                                                                                                                                                                                                                                                                                                                                                                                                                                                                                                                                                                                                                                                                                                                                                                                                                                                                                                                                                                                        |
| Article Type:                 | Protocol                                                                                                                                                                                                                                                                                                                                                                                                                                                                                                                                                                                                                                                                                                                                                                                                                                                                                                                                                                                                                                                                                                                                                                                                                                                                                                                                                                                                                                                                                                                                                                                                                                                                                                                                                                                                                                                                                                                                                                                                                                                   |
| Date Submitted by the Author: | 04-Apr-2018                                                                                                                                                                                                                                                                                                                                                                                                                                                                                                                                                                                                                                                                                                                                                                                                                                                                                                                                                                                                                                                                                                                                                                                                                                                                                                                                                                                                                                                                                                                                                                                                                                                                                                                                                                                                                                                                                                                                                                                                                                                |
| Complete List of Authors:     | <p>Bragazzi, Nicola; Department of Health Sciences (DISSAL), Postgraduate School of Occupational Medicine, University of Genoa</p> <p>Dini, Guglielmo; Department of Health Sciences (DISSAL), Postgraduate School of Occupational Medicine, University of Genoa; Occupational Medicine Unit, Policlinico San Martino Hospital</p> <p>Parodi, Valentina; Department of Health Sciences (DISSAL), Postgraduate School of Occupational Medicine, University of Genoa</p> <p>Blasi, Carlo; Liguria Regional Directorate, National Institution for Insurance Against Accidents at Work (INAIL)</p> <p>Linares, Roberta; Liguria Regional Directorate, National Institution for Insurance Against Accidents at Work (INAIL)</p> <p>Mortara, Virginia; Liguria Regional Directorate, National Institution for Insurance Against Accidents at Work (INAIL)</p> <p>Toletone, Alessandra; Department of Health Sciences (DISSAL), Postgraduate School of Occupational Medicine, University of Genoa; Occupational Medical Service, Local Health Unit 1, Liguria Regional Healthcare System</p> <p>Bersi, Francesca; Department of Health Sciences (DISSAL), Postgraduate School of Occupational Medicine, University of Genoa</p> <p>D'Amico, Beatrice; Department of Health Sciences (DISSAL), Postgraduate School of Occupational Medicine, University of Genoa; Occupational Medicine Unit, Policlinico San Martino Hospital</p> <p>Massa, Emanuela; Department of Health Sciences (DISSAL), Postgraduate School of Occupational Medicine, University of Genoa</p> <p>Montecucco, Alfredo; Department of Health Sciences (DISSAL), Postgraduate School of Occupational Medicine, University of Genoa; Occupational Medicine Unit, Policlinico San Martino Hospital</p> <p>Debarbieri, Nicoletta; Occupational Medicine Unit, Policlinico San Martino Hospital</p> <p>Durando, Paolo; Department of Health Sciences (DISSAL), Postgraduate School of Occupational Medicine, University of Genoa; Occupational Medicine Unit, Policlinico San Martino Hospital</p> |
| Keywords:                     | healthcare workers, injuries, scoping review protocol                                                                                                                                                                                                                                                                                                                                                                                                                                                                                                                                                                                                                                                                                                                                                                                                                                                                                                                                                                                                                                                                                                                                                                                                                                                                                                                                                                                                                                                                                                                                                                                                                                                                                                                                                                                                                                                                                                                                                                                                      |
|                               |                                                                                                                                                                                                                                                                                                                                                                                                                                                                                                                                                                                                                                                                                                                                                                                                                                                                                                                                                                                                                                                                                                                                                                                                                                                                                                                                                                                                                                                                                                                                                                                                                                                                                                                                                                                                                                                                                                                                                                                                                                                            |

1  
2  
3  
4  
5  
6  
7  
8  
9  
10  
11  
12  
13  
14  
15  
16  
17  
18  
19  
20  
21  
22  
23  
24  
25  
26  
27  
28  
29  
30  
31  
32  
33  
34  
35  
36  
37  
38  
39  
40  
41  
42  
43  
44  
45  
46  
47  
48  
49  
50  
51  
52  
53  
54  
55  
56  
57  
58  
59  
60

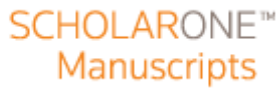

To be submitted to *BMJ Open*

**Protocol of a scoping review assessing injury rate and determinants among healthcare workers in Western countries**

Nicola Luigi Bragazzi<sup>1\*</sup>, Guglielmo Dini<sup>1,2\*</sup>, Valentina Parodi<sup>1</sup>, Carlo Blasi<sup>3</sup>, Roberta Linares<sup>3</sup>, Virginia Mortara<sup>3</sup>, Alessandra Toletone<sup>1,4</sup>, Francesca Bersi<sup>1</sup>, Beatrice D'amico<sup>1,2</sup>, Emanuela Massa<sup>1</sup>, Alfredo Montecucco<sup>1,2</sup>, Nicoletta Debarbieri<sup>2</sup>, Paolo Durando<sup>1,2</sup>

<sup>1</sup>Department of Health Sciences (DISSAL), Postgraduate School of Occupational Medicine, University of Genoa, Italy

<sup>2</sup>Occupational Medicine Unit, Policlinico San Martino Hospital, Genoa, Italy

<sup>3</sup>Liguria Regional Directorate, National Institution for Insurance Against Accidents at Work (INAIL)

<sup>4</sup>Occupational Medical Service, Local Health Unit 1, Liguria Regional Healthcare System, Imperia, Italy

\* These authors contributed equally to this work.

\*Corresponding Author:

Prof. Dr. Paolo Durando, MD, PhD,

Department of Health Sciences (DISSAL), Postgraduate School of Occupational Medicine, University of Genoa and Occupational Medicine Unit, Policlinic San Martino Hospital, Genoa, Italy

Largo R. Benzi 10 (Building 3), 16132 Genoa, Italy

Phone: 0039 0103538133

Fax: 0039 010505618

E-mail: durando@unige.it

## ABSTRACT

**Introduction:** Healthcare workers (HCWs) are subject to different risk factors and risky behaviors that can have a serious impact on their health and work capability. The aim of this protocol is to detail the steps for carrying out a scoping review assessing the prevalence of injuries among these workers category.

**Methods and analysis:** The study will be carried out following the Preferred Reporting Items For Systematic Reviews and Meta-analysis (PRISMA) guidelines. Studies will be selected according the following PICO: P (HCWs), E (exposure to injuries), C (different types of HCWs) and O (prevalence and determinants of injuries). Time filter has been set considering literature between 2000 and 2018 to enable a direct comparison of the findings with the epidemiological figures available at national and local INAIL centers in Italy. On the other hand, no language restriction will be applied. Study quality will be assessed using the Effective Public Health Practice Project (EPHPP) "Quality Assessment Tool for Quantitative Studies" checklist. Heterogeneity and sensitivity analysis, as well as publication bias assessment, will be performed.

**Ethics and dissemination:** Formal ethical approval is not required as primary data will not be collected. The results will be disseminated through a peer-reviewed publication, conference presentation and the popular press.

**Study protocol registration number:** Currently, the "International Prospective Register for Systematic Reviews" (PROSPERO) does not accept to register scoping review protocols.

**Key terms:** healthcare workers; injuries; scoping review protocol

### Strengths and limitations of this study

- This scoping review concerning injuries among HCWs is the most comprehensive and broadest review, of studies performed in Western Countries, existing in the literature.
- Stratifying according to the work tasks and type of injuries could add meaningful information.
- The paucity of found results, especially those concerning some kinds of injuries, could limit generalization and interpretation of the research results.
- Another limitation is given by time filters, which, on the other hand, enable a direct comparison of the findings with the epidemiological figures available at national and local INAIL centers.

## BACKGROUND

Healthcare system represents the fastest growing sector of the economy of Western countries, in that it employs million workers, over 18 millions in the United States and more than 59 millions worldwide.[1] Healthcare workers (HCWs) is an umbrella term, which includes "all people engaged in the promotion, protection or improvement of the health of the population", that is to say a variety of different figures, ranging from medical doctors (like specialists, pediatricians, general practitioners), to midwives and nurses, other health allied professionals, central supply workers and technicians, cleaners and porters, administrative professionals, as well as residents and students.[2-4]

Different variables, including the characteristics of the HCW (i.e., age, gender, education, smoking status, and other lifestyle habits), the features of the patient under care (namely, socio-demographic characteristics of the patient and type of disease) and of the hospital setting (for example, organization, workload, or night shifts) may act as risk factors and impact on HCW's health and safety, leading to injuries or disorders. As other working settings, hospitals are not, indeed, completely safe workplace environments for professionals. HCWs can be exposed to several occupational health hazards, resulting in a relevant clinical, economic and humanistic burden. Injury rates among HCWs constitute the highest injury rates, among all type of workers, in Western countries. Occupational hazards include biological ones (such as infections like, HAV, HBV, HCV, influenza, HIV/AIDS, measles, mumps, rubella, varicella, tuberculosis, pertussis or meningitis, among others),[5-13]. They represent an important occupational health problem: most of them are blood-borne diseases, which can be acquired through needle-stick or sharp injuries. HCWs have contact with infected patients and their body fluids. A particularly important factor is repeated performance of exposure prone procedures (EPPs) that may cause injuries to employees, such as surgeons, midwives, microbiologists, pathologists, blood bank and dialysis staff. According to a recent review by Cooke and Stephens, in 2015 a needle-stick injury generated a cost of 747 dollars (range 199-1,691 dollars).[14] Prüss-Ustün and collaborators, using mathematical modeling, estimated the global burden of infections due to percutaneous injuries among HCWs, on the basis of the probability of injury, the prevalence of infection, the susceptibility of the worker and the percutaneous transmission potential. In Western countries 1,510 HCV, 360 HBV and 11 HIV cases occurred in the year 2000, ranging from 8-27%, 1-8% and 0,5-3,1% of infections, respectively.[15] Incidence rates of sharps injuries range from 1.4 to 9.5 per 100 HCWs, with a weighted mean of 3.7/100 HCWs per year and a related societal mean cost of €272.[16] According to Deuffic-Burban and colleagues, the risk of transmission of blood-borne pathogens infections is estimated to be 30% in susceptible HCWs without post-exposure prophylaxis (PEP) or adequate hepatitis B vaccination,

1  
2  
3 0-0.5%, and <0.3%, for HBV, HCV and HIV, respectively. Adopting preventive measures such as  
4 following standard precautions, or undertaking training sessions targeted for both long-term HCWs,  
5 students and residents at risk, can lead to reduction in the incidence of occupational exposure, and  
6 therefore of percutaneous injuries (PIs). For instance, in France, the proportion of PIs preventable  
7 by taking standard precautions decreased from 52.5% in 2004 to 45.8% in 2008.[17]  
9

10  
11 Other hazards are ergonomic/physical. Musculoskeletal injuries are a leading category of accidents  
12 among HCWs, due to patient handling and overexertion. Musculoskeletal injuries can involve body  
13 structures such as muscles, nerves, tendons and ligaments, joints and cartilage, due to factors like  
14 repetition, force, awkward postures, contact stress or vibration. Healthcare personnel members  
15 dedicated to patient care, as well as to hospital housekeeping, laundry, and food service,  
16 maintenance, central supply and office, are susceptible to such injuries. Patient-handling injuries are  
17 caused by manually lifting patients, who are generally more overweight and obese than in the past.  
18 As such a "Safe Patient Handling--No Manual Lift" policy should be adopted in order to prevent  
19 such accidents, especially given the actual shortage of HCWs and, in particular of nurses, and the  
20 importance of early mobilizing patients and assisting them with physical activities.[18,19]  
21 According to some epidemiological surveys, up to two thirds of nurses have suffered from  
22 musculoskeletal disorders at least once time in their working life for at least 14 days.[20] Other  
23 HCWs with direct patient contact at high risk for developing musculoskeletal disorders are physical  
24 therapists. According to a recent comprehensive narrative review, their lifetime and yearly  
25 prevalence rates are 55-91%, and 40-91.3%, respectively. Injuries generally affect lower back, neck,  
26 upper back and shoulders.[21]  
27

28  
29 Physical violence represents another occupational hazard, which severely impacts on HCWs well-  
30 being, and job motivation, affecting health-care provision and quality.[22] According to the World  
31 Health Organization (WHO) estimates, from 8% to 38% of HCWs have suffered from assaults  
32 perpetrated by patients or visitors at least once at some point in their careers. Recently, the WHO,  
33 the International Labor Organization (ILO), the International Council of Nurses (ICN) and the  
34 Public Services International (PSI) have jointly developed a guideline entitled "Framework  
35 guidelines for addressing workplace violence in the health sector". Physical violence represents a  
36 major source of injuries among HCWs, especially those working in psychiatric wards. According to  
37 a recent review of the literature, in acute psychiatric units lifetime of physical, verbal, threats and  
38 sexual harassment are 24-80%, 46-78.6%, 43-78.6% and 9.5-37.2%, respectively. Sequelae of such  
39 episodes include fractures, eye injuries, and permanent disability, as well as psychological  
40 symptoms, such as anxiety, depression, post-traumatic disorder stress, or avoidance behavior.[23]  
41  
42 Another hospital ward in which violence/assault can be experienced is the emergency department  
43  
44  
45  
46  
47  
48  
49  
50  
51  
52  
53  
54  
55  
56  
57  
58  
59  
60



(ED): according to a recent qualitative meta-synthesis, ED staff perceives aggression as unavoidable and feels isolated in its management.[24] Aggressors usually suffer from psychiatric disorders, have a history of drug and alcohol use, possess weapons, are a victim of violence and are unable to rationally cope with situational crises.[25] In the last years a rise in the number of assault episodes against HCWs has been observed: for example, in a University teaching hospital in the northern part of Italy, non-fatal violence events increased from 20.65/10,000 in 2012 to 22.81/10,000 in 2014, resulting in 431 days of absence from work and generating a direct cost of € 64,170. Up to 75% of violent episodes occurred in emergency room, intermediate care, psychiatry and geriatrics wards.[26]

Less common sources of injuries among HCWs are given by chemical exposure (inhalation of anesthetics, solvents, detergents or reagents)[27] or exposure to physical agents (such as ionizing and non ionizing radiations).

A particular type of injuries is given by commuting injuries. Some investigations conducted among shift and non shift workers found a strict significant relationship between shift-work condition and the presence of excess daytime sleepiness.[28,29] Due to workforce shortage, high workloads, and night shifts, 32% of HCWs report not to get enough sleep.[30]

Systematically identifying and then intervening to alter workplace conditions associated with exposure to health hazards may be an important tool for primary prevention.[31]

## METHODS

### Study design

In order to properly address the research questions, a scoping review will be performed using the 6-stage methodological framework initially proposed by Arksey and O'Malley.[32] This framework comprises 6 steps: namely, i) identifying the research question; ii) identifying relevant studies; iii) study selection; iv) charting the data; v) collating, summarizing and reporting the results; and vi) consultation exercise.[32] The conceptual scheme has been made more detailed and explicit by Levac, Colquhoun and O'Brien,[33] further refined by Colquhoun and collaborators,[34] and subsequently modified by the Joanna Briggs Institute (JBI) in the "JBI scoping review methods" manual.[35-37]

Scoping review is one of the fourteen kinds of literature synthesis identified by the Search, Appraisal, Synthesis and Analysis (SALSA) analytical.[38] In details, it is a review whose *"aim [is] to map rapidly the key concepts underpinning a research area and the main sources and types of evidence available, and can be undertaken as stand-alone projects in their own right, especially where an area is complex or has not been reviewed comprehensively before"*.[39] This specifies a

1  
2  
3 literature search conducted with one or more broad research questions, and performed in an iterative  
4 way to familiarize with the entire literature, to gain a sense of it and to map it properly. Search  
5 restrictive/selective parameters are, indeed, set *a posteriori*. The results are obtained specifying  
6 inclusion and exclusion criteria and, thus, delimiting the outcome(s) of the literature search,  
7 similarly to systematic review, but also time constraints and space filters are allowed, for example,  
8 utilizing deadlines for searching and inclusion/exclusion criteria for study retention. Data are, then,  
9 abstracted and reported in a synthetic format (tables, charts, etc.).  
10  
11

12  
13  
14 The specific methodology of the scoping review was chosen taking into account both the nature and  
15 the specific requests of a national project co-funded and performed in collaboration between the  
16 Department of Health Sciences (DISSAL), Occupational Medicine - University of Genoa, Italy, and  
17 the "Istituto Nazionale per l'Assicurazione contro gli Infortuni sul Lavoro" (National Institution for  
18 Insurance Against Accidents at Work, INAIL). This required a quick assessment of a diverse  
19 amount of scholarly literature, aiming more for breadth rather than for depth. As such, other types  
20 of review identified by the SALSA were not deemed methodologically effective, such as systematic  
21 reviews or rapid reviews.  
22  
23

24  
25  
26 As maintained by Arksey and O'Malley,[32] scoping review may be utilized to assess the topology  
27 of a vast body of literature, and to critically appraise it, in terms of current gaps of knowledge and  
28 future prospects. These aims corresponded to the objectives of our project.  
29  
30

31  
32 More in detail, this scoping review is intended as one of the first step of our research plan: once  
33 "mapped" the extant literature concerning injuries among HCWs, each major topic will be further  
34 developed by in-depth systematic review and/or meta-analysis.  
35  
36

### 37 **Review title**

38  
39 The current review protocol is titled "Protocol of a scoping review assessing injury prevalence and  
40 determinants among healthcare workers in Western countries". The title was guided by the so-called  
41 'PCC' mnemonic (namely, Population, Concept and Context) used by the JBI. Structuring the title  
42 according to the PCC mnemonic enables to clearly reflect and incorporate the core information  
43 about the focus and scope of the review to potential impending readers.  
44  
45

### 46 **Review objective**

47  
48 The study aim will be to map the extant literature concerning injury rate among HCWs in Western  
49 countries and their determinants.  
50

### 51 **Review questions**

52  
53 The main broad research question will be to evaluate the epidemiology of injuries among HCWs in  
54 Western countries carrying out a scoping review, in such a way to provide the health decision- and  
55  
56  
57  
58  
59

1  
2  
3 policy-makers and the stakeholders with an updated synthesis of relevant studies in order to plan  
4 proper preventive strategies and interventions.

5  
6 In details, all the sub-questions are: i) Which is the incidence/prevalence rate of injuries among  
7 HCWs in Western countries? ii) Which are the determinants of injuries among HCWs in Western  
8 countries? iii) Which is the type of injury most commonly occurring among HCWs in Western  
9 countries? iv) Among the different professional figures within the umbrella term of HCWs, which  
10 one(s) is/are the most affected by injuries in Western countries? v) Which is the burden imposed by  
11 injuries among HCWs in terms of related disabilities, residual working capability, absence from  
12 work and generated direct/indirect costs? vi) Which are the state-of-art preventive measures that can  
13 be adopted in order to effectively reduce injuries among HCWs in Western countries?  
14  
15  
16  
17  
18

### 19 **Drafting and registration of the study protocol**

20 This *a priori* protocol is reported in such a way that the objectives and methods of the scoping  
21 review are clearly stated and pre-defined, according to the Preferred Reporting Items for Systematic  
22 Reviews and Meta-Analysis - Protocols (PRISMA-P) guidelines.[40] In accordance with these  
23 guidelines, the scoping review protocol has been submitted to the International Prospective Register  
24 of Systematic Reviews (PROSPERO).[41] However, currently, PROSPERO does not accept to  
25 register scoping review protocols.  
26  
27  
28  
29  
30

31 The results of the study will be reported in line with the PRISMA guidelines (Figure 1).[42]  
32

### 33 **Data sources and Search strategy**

34  
35 A systematic literature search will be performed in the MEDLINE (NLM), Scopus, SciVerse  
36 ScienceDirect, Science Citation Index Expanded and Social Sciences Citation Index from ISI/Web  
37 of Science, ProQuest Research Library, ABI/INFORM, CBCA, *via* the UNO per TUTTI Primo  
38 Central (Ex Libris) platform databases.  
39  
40  
41  
42

43 This will include all studies reporting epidemiological figures of injuries among HCWs in Western  
44 countries in terms of prevalence/incidence rates. The search will be performed using a proper string  
45 of search terms (**Table 1**). The search strategy will be adapted for the other databases. Additionally,  
46 we will search reference lists of the chosen studies and prior reviews. When it will not be possible  
47 to make a decision on a study's inclusion or exclusion based on the abstract, the full text of the  
48 study will be examined.  
49  
50  
51  
52

53 We would like to emphasize that, as maintained by Arksey and O'Malley, scoping reviews,  
54 differently from systematic reviews, do not set *a priori* inclusion/exclusion criteria and data  
55  
56  
57  
58  
59  
60

1  
2  
3 extraction strategies in that these are better defined *post hoc*, that is to say after familiarizing with  
4 the extant literature.[32]  
5

### 6 **Study screening and selection**

7  
8 The studies will be independently screened by seven authors (NLB, GD, VP, FB, EM, BD, and  
9 AM) looking at study titles and abstracts for potential eligibility. Screening questions will be  
10 developed and pilot tested with a subset of records before implementation. Disagreement will be  
11 assessed using  $\kappa$  statistics and will be resolved through discussion; an eighth reviewer (PD) will be  
12 involved if necessary. We will provide a table with characteristics of included studies and another  
13 table of excluded studies with reasons for their exclusion, in our published final review.  
14  
15

16  
17 Studies meeting the following criteria will be considered for inclusion:  
18

- 19  Population: HCWs
- 20
- 21  Exposure: Injuries
- 22
- 23  Design: original articles, prevalence/incidence studies, case series
- 24
- 25  Languages: all languages available.
- 26
- 27
- 28
- 29
- 30

### 31 **Appraisal of Study quality**

32  
33 The Effective Public Health Practice Project (EPHPP) "Quality Assessment Tool for Quantitative  
34 Studies" checklist will be used in order to critically appraise the quality of included studies.[43]  
35 This tool has been specifically developed for dealing with topics related to the field of public health,  
36 including injuries and their prevention. It comprises seven domains: namely, question formulation,  
37 literature *search* and retrieval, determining relevance criteria, assessment of literature for relevance  
38 and quality, data extraction and synthesis, peer review of the report, and dissemination.  
39  
40

41  
42 Five reviewers are contents experts (GD, AT, CB, RL, ND) and one reviewer (NLB) is an  
43 experienced biostatistician/epidemiologist. The contents experts will only assess potential  
44 publications with respect to the appropriateness of the research questions tested. The biostatistician  
45 will only evaluate the appropriateness of methods employed. Disagreements will be resolved by  
46 consensus or involving VM and PD as final referees.  
47  
48

### 49 **Statistical analysis**

50  
51 For the planned meta-analysis, data will be extracted from the studies using a standardized  
52 documentation form. The parameters will be the number of employees examined and the proportion  
53  
54  
55  
56  
57  
58  
59  
60

1  
2  
3 of employees who reported injuries. Prevalence ratios will be calculated as effect estimates. The  
4 95% CIs will be generated. Additional analyses will be performed after stratification by type of  
5 study region, publication period, gender and professional group, as well as considering all the other  
6 variables listed in Table 2. Meta-analyses will be carried out using the commercial software  
7 Comprehensive Meta-Analysis version 3 (CMA v3). This analysis will include different HCWs  
8 professional areas.  
9  
10  
11

### 12 13 **Heterogeneity and sensitivity analysis**

14  
15 We will assess statistical heterogeneity in our meta-analysis, using the  $I^2$  statistics. In details, if the  
16  $I^2$  is >50%, we will regard this as substantial heterogeneity.[44,45]  
17  
18

19 To identify sources of variation, further stratification will be performed relative to study quality and  
20 to performance of confirmatory tests. In addition, for the sensitivity analyses, the stability of the  
21 pooled estimate with respect to each study will be investigated by excluding individual studies from  
22 the analysis.  
23  
24  
25

### 26 27 **Publication bias**

28  
29 Possible publication bias will be visually inspected with a funnel plot, looking at asymmetry of the  
30 graph.[46] If asymmetry is present based on visual assessment, we will perform exploratory  
31 analyses to investigate and adjust this using trim and/or fill analysis.[47] In addition, the probability  
32 of publication bias will be tested using Egger's linear regression.[48]  
33  
34  
35

### 36 37 **Confidence in cumulative evidence**

38  
39 The strength of the body of evidence will be assessed using the "Grading of Recommendations  
40 Assessment, Development and Evaluation" (GRADE) tool.[49]  
41  
42  
43  
44

## 45 **DISCUSSION**

### 46 47 **Implications**

48  
49 This scoping review with planned subsequent systematic review(s) with meta-analysis will provide  
50 the first rigorous analytical synthesis of primary research data concerning the epidemiology of  
51 injuries among HCWs in Western countries. This will be useful for decision makers in order to  
52 develop, design and implement adequate policies for primary prevention.  
53  
54  
55

### 56 57 **Ethics and dissemination**

1  
2  
3 No ethical clearance is required for the present scoping review protocol as well as for its subsequent  
4 implementation steps, in that it will undertake a secondary analysis of data already collected and  
5 published. The findings of the scoping review as well as of its planned systematic review(s) and  
6 meta-analysis will be submitted to peer-reviewed journals for potential publication(s) and will be  
7 the object of *ad hoc* oral/poster communications in relevant national/international scientific  
8 congresses, conferences, as well as will be used to inform the development and implementation of  
9 courses for continuous medical learning.  
10  
11  
12  
13  
14  
15  
16  
17  
18  
19  
20  
21  
22  
23  
24  
25  
26  
27  
28  
29  
30  
31  
32  
33  
34  
35  
36  
37  
38  
39  
40  
41  
42  
43  
44  
45  
46  
47  
48  
49  
50  
51  
52  
53  
54  
55  
56  
57  
58  
59  
60

## References

- 1) World Health Organization. Working Together for Health: World Health Report 2006. Geneva, Switzerland, 2006.
- 2) Joseph B, Joseph M. The health of the healthcare workers. *Indian J Occup Environ Med.* 2016 May-Aug; 20(2): 71–72.
- 3) Adams BO, Dal Poz MR, Shengelia B, et al. Human, Physical, and Intellectual Resource Generation: Proposals for Monitoring. In Murray, C.J.L and Evans, D. (eds) *Health Systems Performance Assessment: Debates, Methods and Empiricism.* Geneva: World Health Organization: 273-287, 2003.
- 4) Diallo K, Zurn P, Gupta N, et al. Monitoring and evaluation of human resources for health: an international perspective. *Hum Resour Health.* 2003 Apr 14;1(1):3.
- 5) Young TN, Arens FJ, Kennedy GE, et al. Antiretroviral post-exposure prophylaxis (PEP) for occupational HIV exposure. *Cochrane Database Syst Rev.* 2007 Jan 24;(1):CD002835.
- 6) Rischitelli G, Harris J, McCauley L, et al. The risk of acquiring hepatitis B or C among public safety workers: a systematic review. *Am J Prev Med.* 2001 May;20(4):299-306.
- 7) Westermann C, Peters C, Lisiak B, et al. The prevalence of hepatitis C among healthcare workers: a systematic review and meta-analysis. *Occup Environ Med.* 2015 Dec;72(12):880-8.
- 8) Dini G, Toletone A, Sticchi L, et al. Influenza vaccination in healthcare workers: A comprehensive critical appraisal of the literature. *Hum Vaccin Immunother.* 2017 Aug 8:1-18.
- 9) Uden L, Barber E, Ford N, et al. Risk of Tuberculosis Infection and Disease for Health Care Workers: An Updated Meta-Analysis. *Open Forum Infect Dis.* 2017 Aug 29;4(3):ofx137.
- 10) Placidi D, Tonozzi B, Alessio L, Porru S. Tuberculin skin test (TST) survey among healthcare workers (HCWs) in hospital: a systematic review of the literature. *G Ital Med Lav Ergon.* 2007 Jul-Sep;29(3 Suppl):409-11.
- 11) Riccò M, Vezzosi L, Odone A, Signorelli C. Invasive Meningococcal Disease on the Workplaces: a systematic review. *Acta Biomed.* 2017 Oct 23;88(3):337-351.
- 12) van den Hoogen A, Duijn JM, Bode LGM, et al. Systematic review found that there was moderate evidence that vaccinating healthcare workers prevented pertussis in infants. *Acta Paediatr.* 2017, in press.
- 13) Leone Roberti Maggiore U, Scala C, et al. Susceptibility to vaccine-preventable diseases and vaccination adherence among healthcare workers in Italy: A cross-sectional survey at a



- 1  
2 regional acute-care university hospital and a systematic review. *Hum Vaccin Immunother.*  
3 2017 Feb;13(2):470-476.  
4  
5  
6 14)Cooke CE, Stephens JM. Clinical, economic, and humanistic burden of needlestick injuries  
7 in healthcare workers. *Med Devices (Auckl).* 2017 Sep 29;10:225-235.  
8  
9  
10 15)Prüss-Ustün A, Rapiti E, Hutin Y. Estimation of the global burden of disease attributable to  
11 contaminated sharps injuries among health-care workers. *Am J Ind Med.* 2005; 48(6): 482.  
12  
13 16)Elseviers MM, Arias-Guillén M, Gorke A, Arens HJ. Sharps injuries amongst healthcare  
14 workers: review of incidence, transmissions and costs. *J Ren Care.* 2014 Sep;40(3):150-6.  
15  
16 17)Deuffic-Burban S, Delarocque-Astagneau E, Abiteboul D, et al. Blood-borne viruses in  
17 health care workers: prevention and management. *J Clin Virol.* 2011 Sep;52(1):4-10.  
18  
19 18)Edlich RF, Hudson MA, Buschbacher RM, et al. Devastating injuries in healthcare workers:  
20 description of the crisis and legislative solution to the epidemic of back injury from patient  
21 lifting. *J Long Term Eff Med Implants.* 2005;15(2):225-41.  
22  
23 19)Nelson AL, Collin J, Knibbe H, et al. Safer patient handling. *Nurs Manage* 2007  
24 Mar;38(3):26–32.  
25  
26 20)Delloiacono N. Musculoskeletal safety for older adults in the workplace: review of current  
27 best practice evidence. *Workplace Health Saf.* 2015 Feb;63(2):48-53.  
28  
29 21)Milhem M, Kalichman L, Ezra D, Alperovitch-Najenson D. Work-related musculoskeletal  
30 disorders among physical therapists: A comprehensive narrative review. *Int J Occup Med*  
31 *Environ Health.* 2016;29(5):735-47.  
32  
33 22)Dillon BL. Workplace violence: impact, causes, and prevention. *Work.* 2012;42(1):15-20.  
34  
35 23)d'Ettorre G, Pellicani V. Workplace Violence Toward Mental Healthcare Workers  
36 Employed in Psychiatric Wards. *Saf Health Work.* 2017 Dec;8(4):337-342.  
37  
38 24)Ashton RA, Morris L, Smith I. A qualitative meta-synthesis of emergency department staff  
39 experiences of violence and aggression. *Int Emerg Nurs.* 2018, in press.  
40  
41 25)Gillespie GL, Gates DM, Miller M, et al. Workplace violence in healthcare settings: risk  
42 factors and protective strategies. *Rehabil Nurs.* 2010 Sep-Oct;35(5):177-84.  
43  
44 26)Sossai D, Molina FS, Amore M, et al. Analysis of incidents of violence in a large italian  
45 hospital. *Med Lav.* 2017 Oct 27;108(5):6005.  
46  
47 27)Molina Aragonés JM, Ayora Ayora A, Barbara Ribalta A, et al. Occupational exposure to  
48 volatile anaesthetics: a systematic review. *Occup Med (Lond).* 2016 Apr;66(3):202-7.  
49  
50 28)Garbarino S, Traversa F, Spigno F, et al. Sleepiness, sleep disorders and risk of occupational  
51 accidents. *G Ital Med Lav Ergon.* 2011 Jul-Sep;33(3 Suppl):207-11.  
52  
53  
54  
55  
56  
57  
58  
59  
60



- 1
- 2
- 3 29) Garbarino S, Repice AM, Traversa F, et al. Commuting accidents: the influence of excessive
- 4 daytime sleepiness. A review of an Italian Police officers population. *G Ital Med Lav Ergon.*
- 5 2007 Jul-Sep;29(3 Suppl):324-6.
- 6
- 7 30) Caruso CC. Negative impacts of shiftwork and long work hours. *Rehabil Nurs.* 2014 Jan-
- 8 Feb;39(1):16-25.
- 9
- 10 31) Copello F, Garbarino S, Messineo A, et al.. Occupational Medicine and Hygiene: applied
- 11 research in Italy. *J Prev Med Hyg.* 2015;56(2):E102-10.
- 12
- 13 32) Arksey H, O'Malley L. Scoping studies: Towards a Methodological Framework. *Int J Soc*
- 14 *Res Methodol.* 2005;8:19–32.
- 15
- 16 33) Levac D, Colquhoun H, O'Brien KK. Scoping studies: advancing the methodology.
- 17 *Implement Sci.* 2010 Sep 20;5:69.
- 18
- 19 34) Colquhoun HL, Levac D, O'Brien KK, et al. Scoping reviews: time for clarity in definition,
- 20 methods, and reporting. *J Clin Epidemiol.* 2014 Dec;67(12):1291-4.
- 21
- 22 35) Tricco AC, Lillie E, Zarin W, et al. A scoping review on the conduct and reporting of
- 23 scoping reviews. *BMC Med Res Methodol.* 2016 Feb 9;16:15.
- 24
- 25 36) Khalil H, Peters M, Godfrey CM, et al. An Evidence-Based Approach to Scoping Reviews.
- 26 *Worldviews Evid Based Nurs.* 2016 Apr;13(2):118-23.
- 27
- 28 37) Peters MD, Godfrey CM, Khalil H, et al. Guidance for conducting systematic scoping
- 29 reviews. *International journal of evidence-based healthcare.* 2015;13(3):141-146.
- 30
- 31 38) Grant MJ, Booth A. A typology of reviews: an analysis of 14 review types and associated
- 32 methodologies. *Health Info Libr J.* 2009 Jun;26(2):91-108.
- 33
- 34 39) Mays N, Roberts E, Popay J. (2001). Synthesising research evidence. In N. Fulop, P. Allen,
- 35 A. Clarke, & N. Black (Eds.), *Studying the organisation and delivery of health services:*
- 36 *Research methods* (pp. 188-219). London: Routledge.
- 37
- 38 40) Shamseer L, Moher D, Clarke M, et al. Preferred reporting items for systematic review and
- 39 meta-analysis protocols (PRISMA-P) 2015: elaboration and explanation. *BMJ.*
- 40 2015;349(jan02 1):g7647.
- 41
- 42 41) Chien PF, Khan KS, Siassakos D. Registration of systematic reviews: PROSPERO. *BJOG.*
- 43 2012 Jul;119(8):903-5.
- 44
- 45 42) Moher D, Liberati A, Tetzlaff J, et al. Preferred reporting items for systematic reviews and
- 46 meta-analyses: the PRISMA Statement. *Open Med.* 2009;3(3):e123-30. Epub 2009 Jul 21.
- 47
- 48 43) Armijo-Olivo S, Stiles CR, Hagen NA, et al. Assessment of study quality for systematic
- 49 reviews: a comparison of the Cochrane Collaboration Risk of Bias Tool and the Effective
- 50
- 51
- 52
- 53
- 54
- 55
- 56
- 57
- 58
- 59
- 60

- 1  
2  
3 Public Health Practice Project Quality Assessment Tool: methodological research. *J Eval*  
4 *Clin Pract*. 2012 Feb;18(1):12-8.  
5  
6 44) Higgins JP, Thompson SG. Quantifying heterogeneity in a meta-analysis. *Stat Med*.  
7 2002;21(11):1539-58.  
8  
9 45) Huedo-Medina TB, Sánchez-Meca J, Marín-Martínez F, et al. Assessing heterogeneity in  
10 meta-analysis: Q statistic or I<sup>2</sup> index? *Psychol Methods*. 2006;11(2):193-206.  
11  
12 46) Sterne JA, Egger M. Funnel plots for detecting bias in meta-analysis: guidelines on choice  
13 of axis. *J Clin Epidemiol*. 2001 Oct;54(10):1046-55.  
14  
15 47) Duval S, Tweedie R. Trim and fill: a simple funnel-plot-based method of testing and  
16 adjusting for publication bias in meta-analysis. *Biometrics*. 2000;56:455-63.  
17  
18 48) Egger M, Davey Smith G, Schneider M, et al. Bias in meta-analysis detected by a simple,  
19 graphical test. *BMJ*. 1997;315(7109):629-34.  
20  
21 49) Dijkers M. Introducing GRADE: a systematic approach to rating evidence in systematic  
22 reviews and to guideline development. 2016. Available at  
23 [http://ktdrr.org/products/update/v1n5/dijkers\\_grade\\_ktupdatev1n5.html](http://ktdrr.org/products/update/v1n5/dijkers_grade_ktupdatev1n5.html)  
24  
25  
26  
27  
28  
29  
30  
31  
32  
33  
34  
35  
36  
37  
38  
39  
40  
41  
42  
43  
44  
45  
46  
47  
48  
49  
50  
51  
52  
53  
54  
55  
56  
57  
58  
59  
60

**Tables.**

Table 1.

| SEARCH STRATEGY ITEM | SEARCH STRATEGY                                                                                                                                                                                                                                                                                                                                                                                                                                                                                                                                                                                                                                                                                                                                                                                                                                                                                                                                                                                                                                                                                                                                                                                                                                                                                                                                                                                                                                                                                                                                                                                                                                                                                                                                                                                                                                                                                                                                      |
|----------------------|------------------------------------------------------------------------------------------------------------------------------------------------------------------------------------------------------------------------------------------------------------------------------------------------------------------------------------------------------------------------------------------------------------------------------------------------------------------------------------------------------------------------------------------------------------------------------------------------------------------------------------------------------------------------------------------------------------------------------------------------------------------------------------------------------------------------------------------------------------------------------------------------------------------------------------------------------------------------------------------------------------------------------------------------------------------------------------------------------------------------------------------------------------------------------------------------------------------------------------------------------------------------------------------------------------------------------------------------------------------------------------------------------------------------------------------------------------------------------------------------------------------------------------------------------------------------------------------------------------------------------------------------------------------------------------------------------------------------------------------------------------------------------------------------------------------------------------------------------------------------------------------------------------------------------------------------------|
| Databases            | PubMed/MEDLINE (NLM), Scopus, SciVerse ScienceDirect, Science Citation Index Expanded and Social Sciences Citation Index from ISI/Web of Science, ProQuest Research Library, ABI/INFORM, CBCA, <i>via</i> the UNO per TUTTI Primo Central (Ex Libris) platform                                                                                                                                                                                                                                                                                                                                                                                                                                                                                                                                                                                                                                                                                                                                                                                                                                                                                                                                                                                                                                                                                                                                                                                                                                                                                                                                                                                                                                                                                                                                                                                                                                                                                       |
| Language filter      | None                                                                                                                                                                                                                                                                                                                                                                                                                                                                                                                                                                                                                                                                                                                                                                                                                                                                                                                                                                                                                                                                                                                                                                                                                                                                                                                                                                                                                                                                                                                                                                                                                                                                                                                                                                                                                                                                                                                                                 |
| Time filter          | 2000-2018                                                                                                                                                                                                                                                                                                                                                                                                                                                                                                                                                                                                                                                                                                                                                                                                                                                                                                                                                                                                                                                                                                                                                                                                                                                                                                                                                                                                                                                                                                                                                                                                                                                                                                                                                                                                                                                                                                                                            |
| Spatial filter       | Western countries                                                                                                                                                                                                                                                                                                                                                                                                                                                                                                                                                                                                                                                                                                                                                                                                                                                                                                                                                                                                                                                                                                                                                                                                                                                                                                                                                                                                                                                                                                                                                                                                                                                                                                                                                                                                                                                                                                                                    |
| Keywords             | <p>1. "healthcare worker" OR "healthcare workers" OR "healthcare personnel" OR "healthcare staff" OR "health worker" OR "health workers" OR "health personnel" OR "health staff" OR physicians OR physician OR doctors OR doctor OR nurses OR nurse OR practitioners OR practitioner OR "medical students" OR "medical residents" OR "attending residents" OR "hospital technician" OR "hospital technicians" OR "paramedical personnel" OR "paramedical staff" OR "hospital support personnel"</p> <p>2. injury OR injuries OR incident OR incidents OR "occupational injury" OR "occupational injuries" OR "occupational incident" OR "occupational incidents" OR "work related injury" OR "work related injuries" OR "work related incident" OR "work related incidents" OR "workplace-induced injury" OR "workplace-induced injuries" OR "workplace-induced incident" OR "workplace-induced incidents" OR "occupational health hazard" OR "occupational health hazards"</p> <p>3. "exposure incidents" OR "splash exposures" OR "splash exposure" OR needle-sticks OR "sharp objects" OR sharps OR "percutaneous injuries" OR "percutaneous injury"</p> <p>4. "manual handling injury" OR "manual handling injuries" OR "musculoskeletal injury" OR "musculoskeletal injuries"</p> <p>5. "chemical occupational exposure" OR "exposure to inhaled anesthetic" OR "reagent exposure" OR "exposure to reagent" OR "exposure to solvents" OR "solvent exposure" OR "exposure to detergents" OR "detergent exposure"</p> <p>6. "slips, trips and falls" OR "slipping, tripping and falling accidents" OR "accidental fall" OR "same-level fall" OR "same-surface fall" OR stump-and-fall OR step-and-fall OR "forced-rotation-type fall" OR "fall from elevation"</p> <p>7. "violent events" OR violence OR assault OR assaults</p> <p>8. "cuts and wounds" OR "burns"</p> <p>9. "motor vehicle accidents" OR "motor vehicle accident" OR "motor</p> |

1  
2  
3  
4  
5  
6  
7  
8  
9  
10  
11  
12  
13  
14  
15  
16  
17  
18  
19  
20  
21  
22  
23  
24  
25  
26  
27  
28  
29  
30  
31  
32  
33  
34  
35  
36  
37  
38  
39  
40  
41  
42  
43  
44  
45  
46  
47  
48  
49  
50  
51  
52  
53  
54  
55  
56  
57  
58  
59  
60

---

|                    |                                                                                                                                                                                                                                                                                                                                                                                                                                                                                                                                                                                                        |
|--------------------|--------------------------------------------------------------------------------------------------------------------------------------------------------------------------------------------------------------------------------------------------------------------------------------------------------------------------------------------------------------------------------------------------------------------------------------------------------------------------------------------------------------------------------------------------------------------------------------------------------|
|                    | vehicle collisions" OR "motor vehicle collision" OR "motor vehicle crash" OR "motor vehicle crashes" OR "motor vehicle near crash" OR "motor vehicle near crashes"                                                                                                                                                                                                                                                                                                                                                                                                                                     |
|                    | 10. "exposure to ionizing radiation" OR "radiation exposure"                                                                                                                                                                                                                                                                                                                                                                                                                                                                                                                                           |
|                    | 1. AND 2. OR 3. OR 4. OR 5. OR 6. OR 7. OR 8. OR 9. OR 10.                                                                                                                                                                                                                                                                                                                                                                                                                                                                                                                                             |
| Inclusion criteria | <p>P: medical/paramedical students and residents, doctors and nurses, cleaners and porters</p> <p>E: exposure to biological, chemical, physical/ergonomic risk and hazard</p> <p>C: medical versus nursing or dental students; students versus residents; medical versus nursing or dental trainees/residents; before and after a preventive program</p> <p>O: prevalence/incidence of injuries and their determinants among healthcare workers in Western countries, related disabilities and absence from work, and generated economic burden (direct/indirect costs)</p> <p>S: primary research</p> |
| Exclusion criteria | Editorial, letter to the editor, commentary, review                                                                                                                                                                                                                                                                                                                                                                                                                                                                                                                                                    |
| Target journals    | Occupational and public health journals                                                                                                                                                                                                                                                                                                                                                                                                                                                                                                                                                                |

---

Table 2.

| EXTRACTED DATA                                     | DETAILS                                                                                                                                                                                                       |
|----------------------------------------------------|---------------------------------------------------------------------------------------------------------------------------------------------------------------------------------------------------------------|
| Study Reference                                    | Names and surnames of authors, year of publication                                                                                                                                                            |
| Study population                                   | Physicians, doctors, nurses, medical students, residents, cleaners, porters                                                                                                                                   |
| Country                                            | Country or countries in which the study or studies was or were carried out                                                                                                                                    |
| Study design                                       | Type of recruitment                                                                                                                                                                                           |
| M%                                                 | Percentage of male healthcare workers                                                                                                                                                                         |
| Age                                                | Mean age of healthcare workers sample                                                                                                                                                                         |
| Sample number, attrition rate                      | Number of healthcare workers who took part into the survey, number of non responders                                                                                                                          |
| Professional/experience years                      | Years spent in profession by healthcare workers included in the study                                                                                                                                         |
| Working setting                                    | Hospital ward where the injury occurred (for example, emergency room, obstetrics department, surgery department, operating room, outpatient clinic, department of Internal Medicine, patients' room, CCU/ICU) |
| Injury prevalence/incidence rate                   | Prevalence/incidence rates stratified according to the kind of injury                                                                                                                                         |
| Method                                             | Questionnaire (validated, not validated)                                                                                                                                                                      |
| Following standard procedures                      | Prevalence/incidence rates stratified according to the compliance to procedures and guidelines among the different types of healthcare workers                                                                |
| Knowledge, attitudes and practices about PEP       | Prevalence/incidence rates stratified according to the knowledge, attitudes and practices concerning PEP, among the different types of healthcare workers                                                     |
| Clerkship abroad                                   | Periods of training abroad; type of task(s) the healthcare worker was involved in during the training period abroad                                                                                           |
| Reporting/non-reporting to Occupational Department | Prevalence/incidence rates stratified according                                                                                                                                                               |

---

|    |                                                 |
|----|-------------------------------------------------|
| 1  |                                                 |
| 2  |                                                 |
| 3  | to the determinants of the reporting/non-       |
| 4  | reporting, among the different types of         |
| 5  | healthcare workers                              |
| 6  |                                                 |
| 7  | Injuries-related burden                         |
| 8  | Number of days of absence from work,            |
| 9  | disabilities and economic direct/indirect costs |
| 10 | due to injuries                                 |
| 11 |                                                 |
| 12 |                                                 |

---

For peer review only

Figures.

Figure 1. Flowchart of selection of studies according to the “Preferred Reporting Items for Systematic Reviews and Meta-analyses” (PRISMA) guidelines.

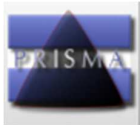

### PRISMA 2009 Flow Diagram

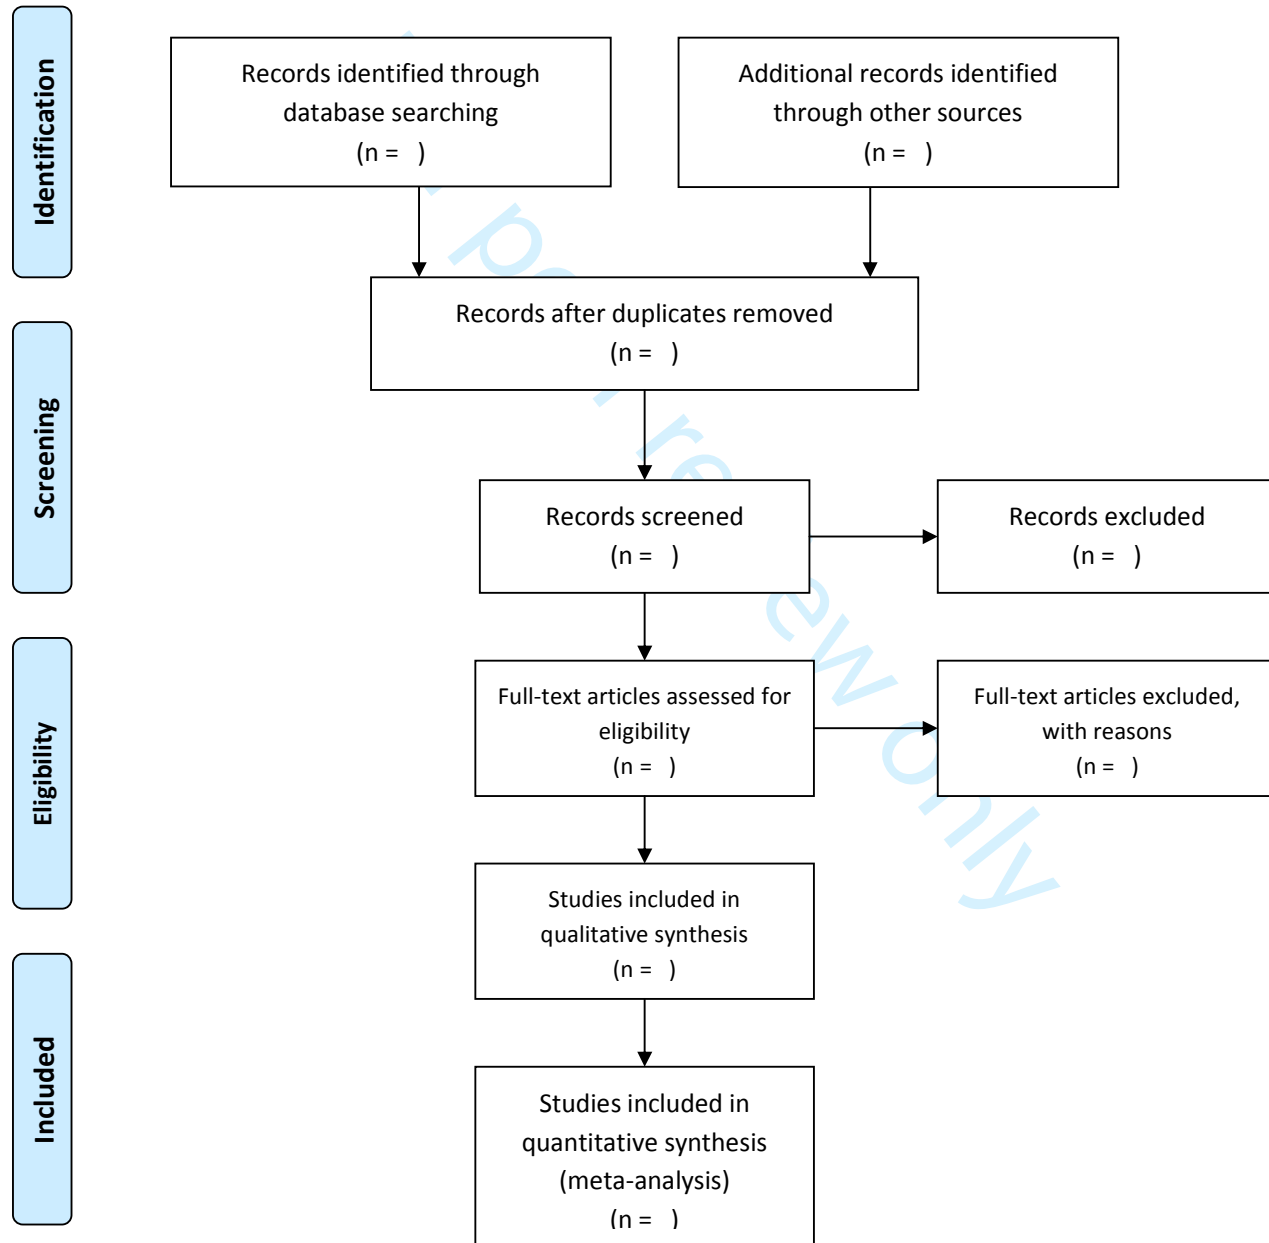

**Authors' contributions:**

All authors participated in drafting the article or revising it critically for important intellectual content; all authors gave final approval of the version to be submitted and any revised version.

**Funding statement:**

This research was co-funded by the "Istituto Nazionale per l'Assicurazione contro gli Infortuni sul Lavoro (INAIL)" and the Department of Health Sciences, Occupational Medicine - University of Genoa, Italy.

**Competing interests statement:**

The authors report no conflicts of interest in this work.



**PRISMA-P (Preferred Reporting Items for Systematic review and Meta-Analysis Protocols) 2015 checklist: recommended items to address in a systematic review protocol\***

| Section and topic                 | Item No | Checklist item                                                                                                                                                                                  | Page of the documents and details                                                                                                                                                                                                                           |
|-----------------------------------|---------|-------------------------------------------------------------------------------------------------------------------------------------------------------------------------------------------------|-------------------------------------------------------------------------------------------------------------------------------------------------------------------------------------------------------------------------------------------------------------|
| <b>ADMINISTRATIVE INFORMATION</b> |         |                                                                                                                                                                                                 |                                                                                                                                                                                                                                                             |
| Title:                            |         |                                                                                                                                                                                                 |                                                                                                                                                                                                                                                             |
| Identification                    | 1a      | Identify the report as a protocol of a systematic review                                                                                                                                        | Protocol of a scoping review assessing injury rate and determinants among healthcare workers in Western countries (page 1)                                                                                                                                  |
| Update                            | 1b      | If the protocol is for an update of a previous systematic review, identify as such                                                                                                              |                                                                                                                                                                                                                                                             |
| Registration                      | 2       | If registered, provide the name of the registry (such as PROSPERO) and registration number                                                                                                      | In accordance with these guidelines, the scoping review protocol has been submitted to the International Prospective Register of Systematic Reviews (PROSPERO). However, currently, PROSPERO does not accept to register scoping review protocols (page 8). |
| Authors:                          |         |                                                                                                                                                                                                 |                                                                                                                                                                                                                                                             |
| Contact                           | 3a      | Provide name, institutional affiliation, e-mail address of all protocol authors; provide physical mailing address of corresponding author                                                       | Page 1 and page 21. Furthermore, role of each author is outlined in the protocol.                                                                                                                                                                           |
| Contributions                     | 3b      | Describe contributions of protocol authors and identify the guarantor of the review                                                                                                             |                                                                                                                                                                                                                                                             |
| Amendments                        | 4       | If the protocol represents an amendment of a previously completed or published protocol, identify as such and list changes; otherwise, state plan for documenting important protocol amendments | The present protocol is not an amendment.                                                                                                                                                                                                                   |
| Support:                          |         |                                                                                                                                                                                                 |                                                                                                                                                                                                                                                             |
| Sources                           | 5a      | Indicate sources of financial or other support for the review                                                                                                                                   | Sources and the role of the sponsor are indicated at page 7 and at page 21.                                                                                                                                                                                 |
| Sponsor                           | 5b      | Provide name for the review funder and/or sponsor                                                                                                                                               |                                                                                                                                                                                                                                                             |
| Role of sponsor or funder         | 5c      | Describe roles of funder(s), sponsor(s), and/or institution(s), if any, in developing the protocol                                                                                              |                                                                                                                                                                                                                                                             |
| <b>INTRODUCTION</b>               |         |                                                                                                                                                                                                 |                                                                                                                                                                                                                                                             |
| Rationale                         | 6       | Describe the rationale for the review in the context of what is already known                                                                                                                   | Rationale is provided in the background (pages 4-6).                                                                                                                                                                                                        |
| Objectives                        | 7       | Provide an explicit statement of the question(s) the review will                                                                                                                                | Page 7.                                                                                                                                                                                                                                                     |

address with reference to participants, interventions, comparators, and outcomes (PICO)

---

## METHODS

---

|                                   |     |                                                                                                                                                                                                                               |                     |
|-----------------------------------|-----|-------------------------------------------------------------------------------------------------------------------------------------------------------------------------------------------------------------------------------|---------------------|
| Eligibility criteria              | 8   | Specify the study characteristics (such as PICO, study design, setting, time frame) and report characteristics (such as years considered, language, publication status) to be used as criteria for eligibility for the review | Page 8 and table 1. |
| Information sources               | 9   | Describe all intended information sources (such as electronic databases, contact with study authors, trial registers or other grey literature sources) with planned dates of coverage                                         | Page 8 and table 1. |
| Search strategy                   | 10  | Present draft of search strategy to be used for at least one electronic database, including planned limits, such that it could be repeated                                                                                    | Page 8 and table 1. |
| Study records:<br>Data management | 11a | Describe the mechanism(s) that will be used to manage records and data throughout the review                                                                                                                                  | Pages 8-9.          |

---

1  
2  
3  
4  
5  
6  
7  
8  
9  
10  
11  
12  
13  
14  
15  
16  
17  
18  
19  
20  
21  
22  
23  
24  
25  
26  
27  
28  
29  
30  
31  
32  
33  
34  
35  
36  
37  
38  
39  
40  
41  
42  
43  
44  
45  
46  
47

|                                    |     |                                                                                                                                                                                                                                                  |            |
|------------------------------------|-----|--------------------------------------------------------------------------------------------------------------------------------------------------------------------------------------------------------------------------------------------------|------------|
| Selection process                  | 11b | State the process that will be used for selecting studies (such as two independent reviewers) through each phase of the review (that is, screening, eligibility and inclusion in meta-analysis)                                                  | Pages 8-9  |
| Data collection process            | 11c | Describe planned method of extracting data from reports (such as piloting forms, done independently, in duplicate), any processes for obtaining and confirming data from investigators                                                           | Pages 8-9  |
| Data items                         | 12  | List and define all variables for which data will be sought (such as PICO items, funding sources), any pre-planned data assumptions and simplifications                                                                                          | Table 2.   |
| Outcomes and prioritization        | 13  | List and define all outcomes for which data will be sought, including prioritization of main and additional outcomes, with Rationale                                                                                                             | Table 2.   |
| Risk of bias in individual studies | 14  | Describe anticipated methods for assessing risk of bias of individual studies, including whether this will be done at the outcome or study level, or both; state how this information will be used in data synthesis                             | Pages 8-10 |
| Data synthesis                     | 15a | Describe criteria under which study data will be quantitatively synthesised                                                                                                                                                                      | Pages 8-10 |
|                                    | 15b | If data are appropriate for quantitative synthesis, describe planned summary measures, methods of handling data and methods of combining data from studies, including any planned exploration of consistency (such as $I^2$ , Kendall's $\tau$ ) |            |
|                                    | 15c | Describe any proposed additional analyses (such as sensitivity or subgroup analyses, meta-regression)                                                                                                                                            |            |
|                                    | 15d | If quantitative synthesis is not appropriate, describe the type of summary planned                                                                                                                                                               |            |
| Meta-bias(es)                      | 16  | Specify any planned assessment of meta-bias(es) (such as publication bias across studies, selective reporting within studies)                                                                                                                    | Pages 8-10 |
| Confidence in cumulative evidence  | 17  | Describe how the strength of the body of evidence will be assessed (such as GRADE)                                                                                                                                                               | Page 10    |

**\* It is strongly recommended that this checklist be read in conjunction with the PRISMA-P Explanation and Elaboration (cite when available) for important clarification on the items. Amendments to a review protocol should be tracked and dated. The copyright for PRISMA-P (including checklist) is held by the PRISMA-P Group and is distributed under a Creative Commons Attribution Licence 4.0.**

*From: Shamseer L, Moher D, Clarke M, Ghersi D, Liberati A, Petticrew M, Shekelle P, Stewart L, PRISMA-P Group. Preferred reporting items for systematic review and meta-analysis protocols (PRISMA-P) 2015: elaboration and explanation. BMJ. 2015 Jan 2;349(jan02 1):g7647.*

# BMJ Open

## Protocol of a scoping review assessing injury rate and its determinants among healthcare workers in Western countries

|                                 |                                                                                                                                                                                                                                                                                                                                                                                                                                                                                                                                                                                                                                                                                                                                                                                                                                                                                                                                                                                                                                                                                                                                                                                                                                                                                                                                                                                                                                                                                                                                                                                                                                                                                                                                                                                                                                                                                                                                                                                                                                                            |
|---------------------------------|------------------------------------------------------------------------------------------------------------------------------------------------------------------------------------------------------------------------------------------------------------------------------------------------------------------------------------------------------------------------------------------------------------------------------------------------------------------------------------------------------------------------------------------------------------------------------------------------------------------------------------------------------------------------------------------------------------------------------------------------------------------------------------------------------------------------------------------------------------------------------------------------------------------------------------------------------------------------------------------------------------------------------------------------------------------------------------------------------------------------------------------------------------------------------------------------------------------------------------------------------------------------------------------------------------------------------------------------------------------------------------------------------------------------------------------------------------------------------------------------------------------------------------------------------------------------------------------------------------------------------------------------------------------------------------------------------------------------------------------------------------------------------------------------------------------------------------------------------------------------------------------------------------------------------------------------------------------------------------------------------------------------------------------------------------|
| Journal:                        | <i>BMJ Open</i>                                                                                                                                                                                                                                                                                                                                                                                                                                                                                                                                                                                                                                                                                                                                                                                                                                                                                                                                                                                                                                                                                                                                                                                                                                                                                                                                                                                                                                                                                                                                                                                                                                                                                                                                                                                                                                                                                                                                                                                                                                            |
| Manuscript ID                   | bmjopen-2018-023372.R1                                                                                                                                                                                                                                                                                                                                                                                                                                                                                                                                                                                                                                                                                                                                                                                                                                                                                                                                                                                                                                                                                                                                                                                                                                                                                                                                                                                                                                                                                                                                                                                                                                                                                                                                                                                                                                                                                                                                                                                                                                     |
| Article Type:                   | Protocol                                                                                                                                                                                                                                                                                                                                                                                                                                                                                                                                                                                                                                                                                                                                                                                                                                                                                                                                                                                                                                                                                                                                                                                                                                                                                                                                                                                                                                                                                                                                                                                                                                                                                                                                                                                                                                                                                                                                                                                                                                                   |
| Date Submitted by the Author:   | 21-Sep-2018                                                                                                                                                                                                                                                                                                                                                                                                                                                                                                                                                                                                                                                                                                                                                                                                                                                                                                                                                                                                                                                                                                                                                                                                                                                                                                                                                                                                                                                                                                                                                                                                                                                                                                                                                                                                                                                                                                                                                                                                                                                |
| Complete List of Authors:       | <p>Bragazzi, Nicola; Department of Health Sciences (DISSAL), Postgraduate School of Occupational Medicine, University of Genoa</p> <p>Dini, Guglielmo; Department of Health Sciences (DISSAL), Postgraduate School of Occupational Medicine, University of Genoa; Occupational Medicine Unit, Policlinico San Martino Hospital</p> <p>Parodi, Valentina; Department of Health Sciences (DISSAL), Postgraduate School of Occupational Medicine, University of Genoa</p> <p>Blasi, Carlo; Liguria Regional Directorate, National Institution for Insurance Against Accidents at Work (INAIL)</p> <p>Linares, Roberta; Liguria Regional Directorate, National Institution for Insurance Against Accidents at Work (INAIL)</p> <p>Mortara, Virginia; Liguria Regional Directorate, National Institution for Insurance Against Accidents at Work (INAIL)</p> <p>Toletone, Alessandra; Department of Health Sciences (DISSAL), Postgraduate School of Occupational Medicine, University of Genoa; Occupational Medical Service, Local Health Unit 1, Liguria Regional Healthcare System</p> <p>Bersi, Francesca; Department of Health Sciences (DISSAL), Postgraduate School of Occupational Medicine, University of Genoa</p> <p>D'Amico, Beatrice; Department of Health Sciences (DISSAL), Postgraduate School of Occupational Medicine, University of Genoa; Occupational Medicine Unit, Policlinico San Martino Hospital</p> <p>Massa, Emanuela; Department of Health Sciences (DISSAL), Postgraduate School of Occupational Medicine, University of Genoa</p> <p>Montecucco, Alfredo; Department of Health Sciences (DISSAL), Postgraduate School of Occupational Medicine, University of Genoa; Occupational Medicine Unit, Policlinico San Martino Hospital</p> <p>Debarbieri, Nicoletta; Occupational Medicine Unit, Policlinico San Martino Hospital</p> <p>Durando, Paolo; Department of Health Sciences (DISSAL), Postgraduate School of Occupational Medicine, University of Genoa; Occupational Medicine Unit, Policlinico San Martino Hospital</p> |
| <b>Primary Subject Heading</b>: | Occupational and environmental medicine                                                                                                                                                                                                                                                                                                                                                                                                                                                                                                                                                                                                                                                                                                                                                                                                                                                                                                                                                                                                                                                                                                                                                                                                                                                                                                                                                                                                                                                                                                                                                                                                                                                                                                                                                                                                                                                                                                                                                                                                                    |
| Secondary Subject Heading:      | Epidemiology                                                                                                                                                                                                                                                                                                                                                                                                                                                                                                                                                                                                                                                                                                                                                                                                                                                                                                                                                                                                                                                                                                                                                                                                                                                                                                                                                                                                                                                                                                                                                                                                                                                                                                                                                                                                                                                                                                                                                                                                                                               |
| Keywords:                       | healthcare workers, injuries, scoping review protocol                                                                                                                                                                                                                                                                                                                                                                                                                                                                                                                                                                                                                                                                                                                                                                                                                                                                                                                                                                                                                                                                                                                                                                                                                                                                                                                                                                                                                                                                                                                                                                                                                                                                                                                                                                                                                                                                                                                                                                                                      |

1  
2  
3  
4  
5  
6  
7  
8  
9  
10  
11  
12  
13  
14  
15  
16  
17  
18  
19  
20  
21  
22  
23  
24  
25  
26  
27  
28  
29  
30  
31  
32  
33  
34  
35  
36  
37  
38  
39  
40  
41  
42  
43  
44  
45  
46  
47  
48  
49  
50  
51  
52  
53  
54  
55  
56  
57  
58  
59  
60

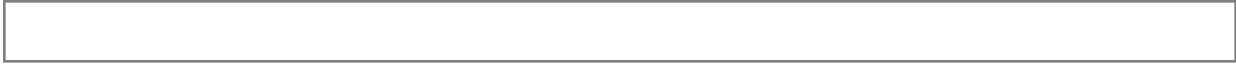

SCHOLARONE™  
Manuscripts

Revised. To be submitted to BMJ Open

**Protocol of a scoping review assessing injury rate and its determinants among healthcare workers in Western countries**

Nicola Luigi Bragazzi<sup>1\*</sup>, Guglielmo Dini<sup>1,2\*</sup>, Valentina Parodi<sup>1</sup>, Carlo Blasi<sup>3</sup>, Roberta Linares<sup>3</sup>, Virginia Mortara<sup>3</sup>, Alessandra Toletone<sup>1,4</sup>, Francesca Bersi<sup>1</sup>, Beatrice D'amico<sup>1,2</sup>, Emanuela Massa<sup>1</sup>, Alfredo Montecucco<sup>1,2</sup>, Nicoletta Debarbieri<sup>2</sup>, Paolo Durando<sup>1,2</sup>

<sup>1</sup>Department of Health Sciences (DISSAL), Postgraduate School of Occupational Medicine, University of Genoa, Italy

<sup>2</sup>Occupational Medicine Unit, Policlinico San Martino Hospital, Genoa, Italy

<sup>3</sup>Liguria Regional Directorate, National Institute for Insurance Against Accidents at Work/ Istituto nazionale per l'assicurazione contro gli infortuni sul lavoro (INAIL)

<sup>4</sup>Occupational Medical Service, Local Health Unit 1, Liguria Regional Healthcare System, Imperia, Italy

\* These authors contributed equally to this work.

\*Corresponding Author:

Prof. Dr. Paolo Durando, MD, PhD,

Department of Health Sciences (DISSAL), Postgraduate School of Occupational Medicine, University of Genoa and Occupational Medicine Unit, Policlinic San Martino Hospital, Genoa, Italy

Largo R. Benzi 10 (Building 3), 16132 Genoa, Italy

Phone: 0039 0103538133

Fax: 0039 010505618

E-mail: durando@unige.it

## ABSTRACT

**Introduction:** Healthcare workers (HCWs) are subject to different risk factors and risky behaviors that can have a serious impact on their health and work capability. The aim of this protocol is to detail the steps for carrying out a scoping review assessing the prevalence/incidence of injuries among HCWs.

**Methods and analysis:** The study will be carried out following the “Preferred Reporting Items for Systematic reviews and Meta-Analysis” (PRISMA) guidelines. Studies will be selected according to the following PECO criteria: P (HCWs), E (exposure to injuries), C (different types of HCWs) and O (prevalence/incidence and determinants of injuries). Time filter has been set considering literature between 2000 and 2018 to enable a direct comparison of the findings with the epidemiological figures available at national and local "Istituto Nazionale per l'Assicurazione contro gli Infortuni sul Lavoro” (National Institute for Insurance Against Accidents at Work, INAIL) centers in Italy. No language restriction will be applied.

**Ethics and dissemination:** Formal ethical approval is not required as primary data will not be collected, being already published. The results will be disseminated through peer-reviewed publication(s), conference presentation(s) and the popular press.

**Key terms:** healthcare workers; injuries; scoping review protocol

### Strengths and limitations of this study

- In the existing scholarly literature, there is not a comprehensive and broad review of studies performed in Western Countries concerning injuries among healthcare workers .
- Stratifying according to the work tasks and type of injuries could add meaningful information.
- A major limitation of the study may be the paucity of found results, especially those concerning certain kinds of injuries.
- Another limitation concerns time filter, which, on the other hand, enables a direct comparison of the findings with the epidemiological figures available at national and local "Istituto Nazionale per l'Assicurazione contro gli Infortuni sul Lavoro" (National Institute for Insurance Against Accidents at Work, INAIL) centers.



## BACKGROUND

The healthcare system represents the fastest growing sector in Western economy and employs millions of workers, over 18 million in the United States and more than 59 million worldwide.<sup>1</sup> Healthcare workers (HCWs) is an umbrella term, which refers to all people engaged in the promotion, protection or improvement of the health of the population. This term includes a variety of different figures, ranging from medical doctors (like specialists, pediatricians, and general practitioners), to midwives and nurses, other health allied professionals, central supply workers and technicians, as well as residents.<sup>2-4</sup>

Different variables may act as risk factors and impact on HCWs' health and safety, which could, in turn, lead to injuries or disorders. These include: the characteristics of the HCWs (age, gender, education, smoking status, and other lifestyle habits), as well as the features of the patient under care (namely, socio-demographic characteristics of the patient and type of disease) and of the hospital setting (for example, organization, workload, or night shifts).

As with other working settings, hospitals are not completely safe workplace environments for professionals. HCWs can be exposed to several occupational health hazards, resulting in a relevant clinical, economic and humanistic burden. Injury rates among HCWs constitute the highest injury rates, among all type of workers, in Western countries.<sup>5,6</sup> Occupational hazards include biological ones (such as infections, like HAV, HBV, HCV, influenza, HIV/AIDS, measles, mumps, rubella, varicella, tuberculosis, pertussis or meningitis, among others).<sup>7-15</sup> They represent an important occupational health problem, as most of them are blood-borne diseases, which can be acquired through needle-stick or sharp injuries. HCWs have contact with infected patients and their body fluids. An important factor is that HCWs are at risk for repeated performance of exposure prone procedures (EPPs) that may cause injuries to employees. These include surgeons, midwives, microbiologists, pathologists, blood bank and dialysis staff. According to a recent review by Cooke and Stephens, in 2015, a needle-stick injury generated a cost of 747 dollars (range 199-1,691 dollars).<sup>16</sup> Prüss-Ustün and collaborators, using mathematical modeling, estimated the global burden of infections due to percutaneous injuries among HCWs. More in detail, this was done on the probability of injury, the prevalence of infection, the susceptibility of the worker and the percutaneous transmission potential. In Western countries, 1,510 HCV, 360 HBV and 11 HIV cases occurred in the year 2000, ranging from 8-27%, 1-8% and 0,5-3,1% of infections, respectively.<sup>17</sup> Incidence rates of sharps injuries ranged from 1.4 to 9.5 per 100 HCWs, with a weighted mean of 3.7/100 HCWs *per* year and a related societal mean cost of €272.<sup>18</sup> According to Deuffic-Burban and colleagues, the risk of transmission of blood-borne pathogens infections is estimated to be 30% in susceptible HCWs without post-exposure prophylaxis (PEP) or adequate hepatitis B vaccination,

1  
2  
3 0-0.5%, and <0.3%, for HBV, HCV and HIV, respectively. Adopting preventive measures such as  
4 following standard precautions or undertaking training sessions targeted for both long-term HCWs,  
5 students and residents at risk can lead to a reduction in the incidence of occupational exposure, and,  
6 therefore, of percutaneous injuries (PIs). For instance, in France, the proportion of PIs preventable  
7 by taking standard precautions decreased from 52.5% in 2004 to 45.8% in 2008.<sup>19</sup>

8  
9  
10  
11 Other hazards are ergonomic/physical. The category of musculoskeletal injuries represents one of  
12 the highest categories of accidents among HCWs, due to patient handling and overexertion.  
13 Musculoskeletal injuries can involve body structures, such as muscles, nerves, tendons and  
14 ligaments, joints and cartilage, due to factors like repetition, force, awkward postures, contact stress  
15 or vibration. Healthcare personnel members dedicated to patient care, as well as to hospital  
16 housekeeping, laundry, and food service, maintenance, central supply and office, are susceptible to  
17 such injuries. Patient-handling injuries are caused by manually lifting patients, who are generally  
18 more overweight and obese than in the past. As such, a "Safe Patient Handling – No Manual Lift"  
19 policy should be adopted in order to prevent such accidents. This is especially of value, given the  
20 actual shortage of HCWs and, in particular, of nurses, and the importance of early mobilizing  
21 patients and assisting them with physical activities.<sup>20,21</sup> According to some epidemiological surveys,  
22 up to two thirds of nurses have suffered from musculoskeletal disorders at least once in their  
23 working life for at least 14 days.<sup>22</sup> Physical therapists are another type of HCWs with direct patient  
24 contact at high risk for developing musculoskeletal disorders. According to a recent comprehensive  
25 narrative review, their lifetime and yearly prevalence rates are 55-91% and 40-91.3%, respectively.  
26 Injuries generally affect lower back, neck, upper back and shoulders.<sup>23</sup>

27  
28  
29  
30  
31  
32  
33  
34  
35  
36  
37 Physical violence represents another occupational hazard, which severely impacts on HCWs' well-  
38 being and job motivation, affecting health-care provision and quality.<sup>24</sup> According to the World  
39 Health Organization (WHO) estimates, from 8% to 38% of HCWs have suffered from assaults  
40 perpetrated by patients or visitors at least once, at some point in their careers. Recently, the WHO,  
41 the "International Labor Organization" (ILO), the "International Council of Nurses" (ICN) and the  
42 "Public Services International" (PSI) have jointly developed a guideline entitled "Framework  
43 guidelines for addressing workplace violence in the health sector".<sup>25</sup> Physical violence represents a  
44 major source of injuries among HCWs, especially those working in psychiatric wards.<sup>26</sup> According  
45 to a recent review of the literature, in acute psychiatric units, lifetime rates of overall assaults,  
46 physical and verbal threats and sexual harassment are 24-80%, 46-78.6%, 43-78.6% and 9.5-37.2%,  
47 respectively. Complications of such episodes include fractures, eye injuries, and permanent  
48 disability, as well as psychological symptoms, such as anxiety, depression, post-traumatic stress  
49 disorder (PTSD), or avoidance behavior.<sup>27,28</sup> Another hospital ward in which violence/assault can be  
50  
51  
52  
53  
54  
55  
56  
57  
58  
59  
60

1  
2  
3 experienced is the emergency department (ED): according to a recent qualitative meta-synthesis,  
4 ED staff perceives aggression as unavoidable and feels isolated in its management.<sup>29</sup> Aggressors  
5 usually suffer from psychiatric disorders, have a history of drug and alcohol use, possess weapons,  
6 are victims of violence and are unable to rationally cope with situational crises.<sup>30</sup> In recent years, a  
7 rise in the number of assault episodes against HCWs has been observed: for example, in a  
8 University teaching hospital in the northern part of Italy, non-fatal violence events increased from  
9 20.65/10,000 in 2012 to 22.81/10,000 in 2014, resulting in 431 days of absence from work and  
10 generating a direct cost of € 64,170. Up to 75% of violent episodes occurred in emergency room,  
11 intermediate care, psychiatry and geriatrics wards.<sup>31</sup>

12  
13  
14  
15  
16  
17  
18 Less common sources of injuries among HCWs are represented by chemical exposure (inhalation of  
19 anesthetics, solvents, detergents or reagents)<sup>32</sup> or exposure to physical agents (such as ionizing and  
20 non ionizing radiations).<sup>33</sup>

21  
22  
23  
24 A particular type of injury is also known to occur among commuters. Some scholars conducted  
25 research among shift and non-shift workers and found a strict, statistically significant relationship  
26 between shift-work condition and the presence of excess daytime sleepiness.<sup>34-37</sup> Due to workforce  
27 shortage, high workloads, and night shifts, 32% of HCWs report not to get enough sleep.<sup>36</sup>

28  
29  
30  
31 Systematically identifying and, then, intervening to alter workplace conditions associated with  
32 exposure to health hazards may be an important tool for primary prevention.<sup>38</sup>

## 33 34 35 36 **METHODS**

### 37 **Review title**

38  
39 The current review protocol is titled "Protocol of a scoping review assessing injury rate and its  
40 determinants among healthcare workers in Western countries". The title was guided by the so-called  
41 'PCC' mnemonic (namely, Population, Concept and Context) used by the Joanna Briggs Institute  
42 (JBI). Structuring the title according to the PCC mnemonic enables to clearly reflect and  
43 incorporate the core information about the focus and scope of the review.

### 44 **Review questions**

45  
46  
47  
48 The main broad research question will be to evaluate the epidemiology of injuries among HCWs in  
49 Western countries by carrying out a scoping review. This is expected to provide the health decision-  
50 and policy-makers and all the involved stakeholders with an updated synthesis of relevant studies,  
51 in order to plan proper *ad hoc* preventive strategies and interventions.

52  
53  
54  
55 More in detail, all the sub-questions are: i) What is the incidence/prevalence rate of injuries among  
56 HCWs in Western countries? ii) What are the determinants of injuries among HCWs in Western  
57  
58  
59

1  
2  
3 countries? iii) What is the type of injury most commonly occurring among HCWs in Western  
4 countries? iv) Among the different professional figures within the umbrella term of HCWs, which  
5 one(s) is/are the most affected by injuries in Western countries? v) What is the burden imposed by  
6 injuries among HCWs in terms of related disabilities, residual working capability, absence from  
7 work and generated direct/indirect costs? vi) What are the state-of-art preventive measures that can  
8 be adopted in order to effectively reduce injuries among HCWs in Western countries?  
9  
10  
11

### 12 **Review objective**

13  
14 The study aim will be to map the existing literature concerning injury rate among HCWs in Western  
15 countries and its determinants. As such, the main “*end product ... [will be] ... a narrative*  
16 *presentation, with minimal or limited statistical information*”.<sup>39</sup> Secondary objective will be to  
17 verify the feasibility of performing systematic review(s) and meta-analysis.  
18  
19

### 20 **Study design**

21  
22 In order to properly address the research questions, a scoping review will be performed using the 6-  
23 stage methodological framework initially proposed by Arksey and O'Malley.<sup>40</sup> This framework  
24 comprises 6 steps: namely, i) identifying the research question; ii) identifying relevant studies; iii)  
25 study selection; iv) charting the data; v) collating, summarizing and reporting the results; and vi)  
26 consultation exercise.<sup>41</sup> The conceptual scheme has been made more detailed and explicit by Levac,  
27 Colquhoun and O'Brien,<sup>42</sup> further refined by Colquhoun and collaborators,<sup>43</sup> and subsequently  
28 modified by the JBI in the "JBI scoping review methods" manual.<sup>39,44</sup>  
29

30  
31 Scoping review is one of the fourteen kinds of literature synthesis, according to the “Search,  
32 Appraisal, Synthesis and Analysis” (SALSA) framework.<sup>45</sup> In detail, it is a review whose “*aim [is]*  
33 *to map rapidly the key concepts underpinning a research area and the main sources and types of*  
34 *evidence available, and can be undertaken as stand-alone projects in their own right, especially*  
35 *where an area is complex or has not been reviewed comprehensively before*”.<sup>46</sup> This specifies a  
36 literature search conducted with one or more broad research questions, and performed in an iterative  
37 way to familiarize with the entire literature, to gain a sense of it and to map it properly. Search  
38 restrictive/selective parameters can be set *a posteriori*. The results are obtained specifying inclusion  
39 and exclusion criteria and, thus, delimiting the outcome(s) of the literature search, similarly to  
40 systematic review, but also time constraints and space filters are allowed, for example, utilizing  
41 deadlines for searching and inclusion/exclusion criteria for study retention. Data are, then,  
42 abstracted and reported in a synthetic format (tables, charts, etc.).  
43  
44

45  
46 The specific methodology of the scoping review was chosen to take into account both the nature  
47 and the specific requests of a national project co-funded and performed in collaboration between the  
48 Department of Health Sciences (DISSAL), Occupational Medicine - University of Genoa, Italy, and  
49  
50  
51  
52

1  
2  
3 the "Istituto Nazionale per l'Assicurazione contro gli Infortuni sul Lavoro" (in Italian, "National  
4 Institute for Insurance Against Accidents at Work", INAIL). This required a quick assessment of a  
5 diverse amount of scholarly literature, aiming more for breadth rather than for depth. As such, other  
6 types of review identified by the SALSA framework were not deemed methodologically effective,  
7 such as systematic reviews, umbrella reviews or rapid reviews.  
8  
9

10 As maintained by Arksey and O'Malley,<sup>40</sup> scoping reviews may be utilized to assess the topology  
11 of a vast body of literature, and to critically appraise it, in terms of current gaps of knowledge and  
12 future prospects. These aims corresponded to the objectives (both primary and secondary) of our  
13 project.  
14  
15

### 16 **Drafting and registration of the study protocol**

17 This *a priori* protocol is reported in such a way that the objectives and methods of the scoping  
18 review are clearly stated and pre-defined, according to the Preferred Reporting Items for Systematic  
19 Reviews and Meta-Analysis – Protocols (PRISMA-P) guidelines.<sup>47</sup> However, despite the  
20 recommendation of these guidelines, it was not possible to register the scoping review protocol in  
21 the "International Prospective Register of Systematic Reviews" (PROSPERO),<sup>48</sup> in that it,  
22 currently, does not accept scoping review protocols.  
23  
24  
25  
26  
27  
28

29 The results of the study will be reported in line with the PRISMA guidelines (Figure 1).<sup>49</sup>  
30  
31

### 32 **Data sources and Search strategy**

33  
34 A systematic literature search will be performed in the MEDLINE (NLM), Scopus, SciVerse  
35 ScienceDirect, Science Citation Index Expanded and Social Sciences Citation Index from ISI/Web  
36 of Science, ProQuest Research Library, ABI/INFORM, CBCA, *via* the UNO per TUTTI Primo  
37 Central (Ex Libris) platform databases.  
38  
39  
40

41 This will include all studies reporting epidemiological figures of injuries among HCWs in Western  
42 countries in terms of prevalence/incidence rates. The search will be performed using a proper string  
43 of search terms (**Table 1**). The search strategy will be adapted for the other databases. Additionally,  
44 we will search reference lists of the chosen studies and prior reviews. When it will not be possible  
45 to make a decision on a study's inclusion or exclusion based on the abstract, the full text of the  
46 study will be examined.  
47  
48  
49  
50

51 We would like to emphasize that, as maintained by Arksey and O'Malley, scoping reviews, differ  
52 from systematic reviews and do not set *a priori* inclusion/exclusion criteria and data extraction  
53 strategies. These are better defined *post hoc*, that is to say after familiarizing with the existing  
54  
55  
56  
57  
58  
59  
60

1  
2  
3 literature.<sup>40</sup> We have carried out a preliminary literature search on the topic of interest in order to  
4 preliminarily clarify inclusion/exclusion criteria  
5

### 6 7 **Study screening and selection**

8  
9 The studies will be independently screened by two authors (NLB and GD), looking at study titles  
10 and abstracts for potential eligibility. Screening questions will be developed and pilot tested with a  
11 subset of records before implementation. The inter-rater agreement will be assessed using  $\kappa$   
12 statistics and will be resolved through discussion; a third reviewer (PD), acting as a final referee,  
13 will be involved if necessary. We will provide a table with characteristics of included studies and  
14 another table of excluded studies with reasons for their exclusion, in our published final scoping  
15 review.  
16  
17  
18  
19

20  
21 Studies meeting the following PECO criteria will be considered for inclusion:<sup>50</sup>  
22

- 23 • P (patient, problem or population): HCWs;
- 24 • E (exposure): injuries;
- 25 • C (comparison, control or comparator): different types of HCWs;
- 26 • O (outcome/outcomes of interest): prevalence/incidence and determinants of injuries.  
27  
28  
29

30  
31 Furthermore, the following criteria will be taken into consideration:  
32

- 33 • Study design/characteristics: original articles, prevalence/incidence studies, case series;
- 34 • Languages: no language filter/restraint (that is to say, all the full complement of Western  
35 languages available).  
36  
37  
38

### 39 **Appraisal of Study quality**

40  
41 In the drafting of the scoping review, we will not critically appraise the methodological quality or  
42 risk of bias of the included articles, as this will be done in the next steps, once verified the  
43 feasibility of performing systematic review(s) and meta-analysis.  
44  
45

46  
47 In case of feasibility, the “Effective Public Health Practice Project” (EPHPP) “Quality Assessment  
48 Tool for Quantitative Studies” checklist will be used in order to critically appraise the quality of  
49 included studies.<sup>51</sup> This tool has been specifically developed for dealing with topics related to the  
50 field of public health. This includes injuries and their prevention. It comprises seven domains:  
51 namely, i) question formulation, ii) literature search and retrieval, iii) determining relevance criteria,  
52 iv) assessment of literature for relevance and quality, v) data extraction and synthesis, vi) peer  
53 review of the report, and vii) dissemination.  
54  
55  
56  
57  
58  
59



Two reviewers are contents experts (GD and AT) and one reviewer (NLB) is an experienced biostatistician/epidemiologist. The contents experts will only assess potential publications with respect to the appropriateness of the research questions tested. The biostatistician will only evaluate the appropriateness of methods employed. Disagreements will be resolved by consensus or involving VM and PD (mentors and supervisors of the scientific research project), who will act as final referees. PD is an occupational physician, coming from academic setting, whereas VM is an occupational physician with expertise in the field of social security and insurance.

### **Statistical analysis**

For the planned systematic review(s) and meta-analysis, once feasibility has been verified, data will be extracted from the studies using a standardized documentation form. The parameters will be the number of employees examined and the proportion of employees who reported injuries. Prevalence/incidence ratios will be calculated as effect size estimates. The 95% confidence intervals (CIs) will be generated.

Additional analyses will be performed after stratification by type of study region, publication period, gender and professional group, as well as considering all the other variables listed in **Table 2**. Meta-analyses will be carried out using the commercial software Comprehensive Meta-Analysis version 3 (CMA v3). This analysis will include different HCWs' professional areas.

### **Heterogeneity and sensitivity analysis**

Once verified the feasibility of conducting systematic review(s) and meta-analysis, we will assess statistical heterogeneity in our meta-analysis, using the  $I^2$  statistics. In details, if the  $I^2$  is  $>50\%$ , we will regard this as substantial, statistically significant heterogeneity.<sup>52,53</sup>

To identify sources of variation, further stratification will be performed based on study quality. In addition, for the sensitivity analyses, the stability of the pooled estimate with respect to each study will be investigated by excluding individual studies from the analysis.

### **Publication bias**

Once verified the feasibility of conducting systematic review(s) and meta-analysis, possible publication bias will be visually inspected with a funnel plot, looking at asymmetry of the graph.<sup>54</sup> If asymmetry is present based on visual assessment, we will perform exploratory analyses to investigate it and adjust the pooled estimate using the trim and/or fill analysis.<sup>55</sup> In addition, the probability of publication bias will be tested using the Egger's linear regression.<sup>56</sup>

### **Confidence in cumulative evidence**

Once the feasibility of carrying out systematic review(s) and meta-analysis has been verified, the strength of the body of evidence will be assessed using the “Grading of Recommendations Assessment, Development and Evaluation” (GRADE) tool.<sup>57</sup>

### **Patient and public involvement**

There was no specific patient and public involvement in the development of this scoping review.

## **DISCUSSION**

### **Implications**

This scoping review with planned subsequent systematic review(s) with meta-analysis will provide the first rigorous analytical synthesis of primary research data concerning the epidemiology of injuries among HCWs in Western countries. This will be useful for decision- and policy-makers in order to develop, design and implement *ad hoc* adequate policies for primary prevention.

### **Ethics and dissemination**

No ethical clearance is required for the present scoping review protocol and for its subsequent implementation steps, in that it will undertake a knowledge synthesis and an analysis of data that have been already collected and published. The findings of the scoping review as well as of its potentially planned systematic review(s) and meta-analysis will be submitted to peer-reviewed journals for potential publication(s) and will be the object of *ad hoc* oral/poster communications in relevant national/international scientific congresses, conferences, and will be used to inform the development and implementation of courses for continuous medical learning.



## References

- 1) World Health Organization. Working Together for Health: World Health Report 2006. Geneva: Switzerland, 2006.
- 2) Joseph B, Joseph M. The health of the healthcare workers. *Indian J Occup Environ Med* 2016;20(2):71–72.
- 3) Adams BO, Dal Poz MR, Shengelia B, *et al.* Human, Physical, and Intellectual Resource Generation: Proposals for Monitoring. In Murray, C.J.L and Evans, D. (eds) Health Systems Performance Assessment: Debates, Methods and Empiricism. Geneva: World Health Organization: 273-287, 2003.
- 4) Diallo K, Zurn P, Gupta N, *et al.* Monitoring and evaluation of human resources for health: an international perspective. *Hum Resour Health* 2003;1(1):3.
- 5) Dressner MA. Hospital workers: an assessment of occupational injuries and illnesses. Monthly Labor Review, U.S. Bureau of Labor Statistics, June 2017.
- 6) Miller K. Risk factors and impacts of occupational injury in healthcare workers: A critical review. *OA Musculoskeletal Medicine* 2013 Mar 01;1(1):4.
- 7) Young TN, Arens FJ, Kennedy GE, *et al.* Antiretroviral post-exposure prophylaxis (PEP) for occupational HIV exposure. *Cochrane Database Syst Rev* 2007;(1):CD002835.
- 8) Rischitelli G, Harris J, McCauley L, *et al.* The risk of acquiring hepatitis B or C among public safety workers: a systematic review. *Am J Prev Med.* 2001 May;20(4):299-306.
- 9) Westermann C, Peters C, Lisiak B, *et al.* The prevalence of hepatitis C among healthcare workers: a systematic review and meta-analysis. *Occup Environ Med.* 2015 Dec;72(12):880-8.
- 10) Dini G, Toletone A, Sticchi L, *et al.* Influenza vaccination in healthcare workers: A comprehensive critical appraisal of the literature. *Hum Vaccin Immunother.* 2017 Aug 8:1-18.
- 11) Uden L, Barber E, Ford N, *et al.* Risk of Tuberculosis Infection and Disease for Health Care Workers: An Updated Meta-Analysis. *Open Forum Infect Dis.* 2017 Aug 29;4(3):ofx137.
- 12) Placidi D, Tonozzi B, Alessio L, Porru S. Tuberculin skin test (TST) survey among healthcare workers (HCWs) in hospital: a systematic review of the literature. *G Ital Med Lav Ergon.* 2007 Jul-Sep;29(3 Suppl):409-11.
- 13) Riccò M, Vezzosi L, Odone A, *et al.* Invasive Meningococcal Disease on the Workplaces: a systematic review. *Acta Biomed.* 2017 Oct 23;88(3):337-351.

- 14) van den Hoogen A, Duijn JM, Bode LGM, *et al.* Systematic review found that there was moderate evidence that vaccinating healthcare workers prevented pertussis in infants. *Acta Paediatr.* 2017, in press.
- 15) Leone Roberti Maggiore U, Scala C, *et al.* Susceptibility to vaccine-preventable diseases and vaccination adherence among healthcare workers in Italy: A cross-sectional survey at a regional acute-care university hospital and a systematic review. *Hum Vaccin Immunother.* 2017 Feb;13(2):470-476.
- 16) Cooke CE, Stephens JM. Clinical, economic, and humanistic burden of needlestick injuries in healthcare workers. *Med Devices (Auckl)* 2017;10:225-235.
- 17) Prüss-Ustün A, Rapiti E, Hutin Y. Estimation of the global burden of disease attributable to contaminated sharps injuries among health-care workers. *Am J Ind Med* 2005;48(6):482.
- 18) Elseviers MM, Arias-Guillén M, Gorke A, *et al.* Sharps injuries amongst healthcare workers: review of incidence, transmissions and costs. *J Ren Care* 2014 Sep;40(3):150-6.
- 19) Deuffic-Burban S, Delarocque-Astagneau E, Abiteboul D, *et al.* Blood-borne viruses in health care workers: prevention and management. *J Clin Virol* 2011;52(1):4-10.
- 20) Edlich RF, Hudson MA, Buschbacher RM, *et al.* Devastating injuries in healthcare workers: description of the crisis and legislative solution to the epidemic of back injury from patient lifting. *J Long Term Eff Med Implants* 2005;15(2):225-41.
- 21) Nelson AL, Collin J, Knibbe H, *et al.* Safer patient handling. *Nurs Manage* 2007;38(3):26-32.
- 22) Delloiacono N. Musculoskeletal safety for older adults in the workplace: review of current best practice evidence. *Workplace Health Saf* 2015;63(2):48-53.
- 23) Milhem M, Kalichman L, Ezra D, *et al.* Work-related musculoskeletal disorders among physical therapists: A comprehensive narrative review. *Int J Occup Med Environ Health.* 2016;29(5):735-47.
- 24) Dillon BL. Workplace violence: impact, causes, and prevention. *Work* 2012;42(1):15-20.
- 25) International Labour Office (ILO), International Council of Nurses (ICN), World Health Organization (WHO), Public Services International (PSI). Joint Programme on Workplace Violence in the Health Sector. Geneva, 2002.
- 26) Spaducci G, Stubbs B, McNeill A, Stewart D, Robson D. Violence in mental health settings: A systematic review. *Int J Ment Health Nurs.* 2018 Feb;27(1):33-45.
- 27) d'Ettorre G, Pellicani V. Workplace Violence Toward Mental Healthcare Workers Employed in Psychiatric Wards. *Saf Health Work* 2017;8(4):337-342.

- 1  
2  
3 28) Luftman K, Aydelotte J, Rix K, et al. PTSD in those who care for the injured. *Injury*. 2017  
4 Feb;48(2):293-296.  
5  
6 29) Ashton RA, Morris L, Smith I. A qualitative meta-synthesis of emergency department staff  
7 experiences of violence and aggression. *Int Emerg Nurs*. 2018, in press.  
8  
9 30) Gillespie GL, Gates DM, Miller M, et al. Workplace violence in healthcare settings: risk  
10 factors and protective strategies. *Rehabil Nurs* 2010;35(5):177-84.  
11  
12 31) Sossai D, Molina FS, Amore M, et al. Analysis of incidents of violence in a large Italian  
13 hospital. *Med Lav*. 2017 Oct 27;108(5):6005.  
14  
15 32) Molina Aragonés JM, Ayora Ayora A, Barbara Ribalta A, et al. Occupational exposure to  
16 volatile anaesthetics: a systematic review. *Occup Med (Lond)*. 2016 Apr;66(3):202-7.  
17  
18 33) Caciari T, Capozzella A, Tomei F, et al. Professional exposure to ionizing radiations in  
19 health workers and white blood cells. *Ann Ig*. 2012 Nov-Dec;24(6):465-74.  
20  
21 34) Garbarino S, Traversa F, Spigno F, et al. Sleepiness, sleep disorders and risk of occupational  
22 accidents. *G Ital Med Lav Ergon*. 2011 Jul-Sep;33(3 Suppl):207-11.  
23  
24 35) Garbarino S, Repice AM, Traversa F, et al. Commuting accidents: the influence of excessive  
25 daytime sleepiness. A review of an Italian Police officers population. *G Ital Med Lav Ergon*  
26 2007;29(3 Suppl):324-6.  
27  
28 36) Caruso CC. Negative impacts of shiftwork and long work hours. *Rehabil Nurs*. 2014 Jan-  
29 Feb;39(1):16-25.  
30  
31 37) Booker LA, Magee M, Rajaratnam SMW, et al. Individual vulnerability to insomnia,  
32 excessive sleepiness and shift work disorder amongst healthcare shift workers. A systematic  
33 review. *Sleep Med Rev*. 2018  
34  
35 38) Copello F, Garbarino S, Messineo A, et al. Occupational Medicine and Hygiene: applied  
36 research in Italy. *J Prev Med Hyg* 2015;56(2):E102-10.  
37  
38 39) Khalil H, Peters M, Godfrey CM, et al. An Evidence-Based Approach to Scoping Reviews.  
39 *Worldviews Evid Based Nurs* 2016;13(2):118-23.  
40  
41 40) Arksey H, O'Malley L. Scoping studies: Towards a Methodological Framework. *Int J Soc*  
42 *Res Methodol* 2005;8:19-32.  
43  
44 41) Levac D, Colquhoun H, O'Brien KK. Scoping studies: advancing the methodology.  
45 *Implement Sci* 2010;5:69.  
46  
47 42) Colquhoun HL, Levac D, O'Brien KK, et al. Scoping reviews: time for clarity in definition,  
48 methods, and reporting. *J Clin Epidemiol*. 2014 Dec;67(12):1291-4.  
49  
50 43) Tricco AC, Lillie E, Zarin W, et al. A scoping review on the conduct and reporting of  
51 scoping reviews. *BMC Med Res Methodol* 2016;16:15.  
52  
53  
54  
55  
56  
57  
58  
59

- 1  
2  
3 44) Peters MD, Godfrey CM, Khalil H, *et al.* Guidance for conducting systematic scoping  
4 reviews. *Int J Evid Based Healthc* 2015;13(3):141-146.  
5  
6 45) Grant MJ, Booth A. A typology of reviews: an analysis of 14 review types and associated  
7 methodologies. *Health Info Libr J* 2009;26(2):91-108.  
8  
9 46) Mays N, Roberts E, Popay J. Synthesising research evidence. In N. Fulop, P. Allen, A.  
10 Clarke, & N. Black (Eds.), *Studying the organisation and delivery of health services: Research methods* (pp. 188-219). London: Routledge, 2001.  
11  
12 47) Peterson J, Pearce PF, Ferguson LA, *et al.* Understanding scoping reviews: Definition,  
13 purpose, and process. *J Am Assoc Nurse Pract* 2017;29(1):12-16.  
14  
15 48) Shamseer L, Moher D, Clarke M, *et al.* Preferred reporting items for systematic review and  
16 meta-analysis protocols (PRISMA-P) 2015: elaboration and explanation. *BMJ*  
17 2015;349(jan02 1):g7647.  
18  
19 49) Chien PF, Khan KS, Siassakos D. Registration of systematic reviews: PROSPERO. *BJOG*  
20 2012;119(8):903-5.  
21  
22 50) Moher D, Liberati A, Tetzlaff J, *et al.* Preferred reporting items for systematic reviews and  
23 meta-analyses: the PRISMA Statement. *Open Med* 2009;3(3):e123-30.  
24  
25 51) Schaefer HR, Myers JL. Guidelines for performing systematic reviews in the development  
26 of toxicity factors. *Regulatory Toxicology and Pharmacology*. 2017;91:124-141.  
27  
28 52) Armijo-Olivo S, Stiles CR, Hagen NA, *et al.* Assessment of study quality for systematic  
29 reviews: a comparison of the Cochrane Collaboration Risk of Bias Tool and the Effective  
30 Public Health Practice Project Quality Assessment Tool: methodological research. *J Eval*  
31 *Clin Pract*. 2012 Feb;18(1):12-8.  
32  
33 53) Higgins JP, Thompson SG. Quantifying heterogeneity in a meta-analysis. *Stat Med*.  
34 2002;21(11):1539-58.  
35  
36 54) Huedo-Medina TB, Sánchez-Meca J, Marín-Martínez F, *et al.* Assessing heterogeneity in  
37 meta-analysis: Q statistic or I<sup>2</sup> index? *Psychol Methods*. 2006;11(2):193-206.  
38  
39 55) Sterne JA, Egger M. Funnel plots for detecting bias in meta-analysis: guidelines on choice  
40 of axis. *J Clin Epidemiol*. 2001 Oct;54(10):1046-55.  
41  
42 56) Duval S, Tweedie R. Trim and fill: a simple funnel-plot-based method of testing and  
43 adjusting for publication bias in meta-analysis. *Biometrics*. 2000;56:455-63.  
44  
45 57) Egger M, Davey Smith G, Schneider M, *et al.* Bias in meta-analysis detected by a simple,  
46 graphical test. *BMJ*. 1997;315(7109):629-34.  
47  
48  
49  
50  
51  
52  
53  
54  
55  
56  
57  
58  
59  
60

1  
2  
3 **Tables.**

4  
5 **Table 1. Planned search strategy.**

| SEARCH STRATEGY ITEM | SEARCH STRATEGY                                                                                                                                                                                                                                                                                                                                                                                                                                                                                                                                                                                                                                                                                                                                                                                                                                                                                                                                                                                                                                                                                                                                                                                                                                                                                                                                                                                                                                                                                                                                                                                                                                                                                                                                                                                                                                                            |
|----------------------|----------------------------------------------------------------------------------------------------------------------------------------------------------------------------------------------------------------------------------------------------------------------------------------------------------------------------------------------------------------------------------------------------------------------------------------------------------------------------------------------------------------------------------------------------------------------------------------------------------------------------------------------------------------------------------------------------------------------------------------------------------------------------------------------------------------------------------------------------------------------------------------------------------------------------------------------------------------------------------------------------------------------------------------------------------------------------------------------------------------------------------------------------------------------------------------------------------------------------------------------------------------------------------------------------------------------------------------------------------------------------------------------------------------------------------------------------------------------------------------------------------------------------------------------------------------------------------------------------------------------------------------------------------------------------------------------------------------------------------------------------------------------------------------------------------------------------------------------------------------------------|
| Databases            | PubMed/MEDLINE (NLM), Scopus, SciVerse ScienceDirect, Science Citation Index Expanded and Social Sciences Citation Index from ISI/Web of Science, ProQuest Research Library, ABI/INFORM, CBCA, <i>via</i> the UNO per TUTTI Primo Central (Ex Libris) platform                                                                                                                                                                                                                                                                                                                                                                                                                                                                                                                                                                                                                                                                                                                                                                                                                                                                                                                                                                                                                                                                                                                                                                                                                                                                                                                                                                                                                                                                                                                                                                                                             |
| Language filter      | None                                                                                                                                                                                                                                                                                                                                                                                                                                                                                                                                                                                                                                                                                                                                                                                                                                                                                                                                                                                                                                                                                                                                                                                                                                                                                                                                                                                                                                                                                                                                                                                                                                                                                                                                                                                                                                                                       |
| Time filter          | 2000-2018                                                                                                                                                                                                                                                                                                                                                                                                                                                                                                                                                                                                                                                                                                                                                                                                                                                                                                                                                                                                                                                                                                                                                                                                                                                                                                                                                                                                                                                                                                                                                                                                                                                                                                                                                                                                                                                                  |
| Spatial filter       | Western countries                                                                                                                                                                                                                                                                                                                                                                                                                                                                                                                                                                                                                                                                                                                                                                                                                                                                                                                                                                                                                                                                                                                                                                                                                                                                                                                                                                                                                                                                                                                                                                                                                                                                                                                                                                                                                                                          |
| Keywords             | <p>1. "healthcare worker" OR "healthcare workers" OR "healthcare personnel" OR "healthcare staff" OR "health worker" OR "health workers" OR "health personnel" OR "health staff" OR physicians OR physician OR doctors OR doctor OR nurses OR nurse OR practitioners OR practitioner OR "medical students" OR "medical residents" OR "attending residents" OR "hospital technician" OR "hospital technicians" OR "paramedical personnel" OR "paramedical staff" OR "hospital support personnel"</p> <p>2. injury OR injuries OR incident OR incidents OR "occupational injury" OR "occupational injuries" OR "occupational incident" OR "occupational incidents" OR "work related injury" OR "work related injuries" OR "work related incident" OR "work related incidents" OR "workplace-induced injury" OR "workplace-induced injuries" OR "workplace-induced incident" OR "workplace-induced incidents" OR "occupational health hazard" OR "occupational health hazards"</p> <p>3. "exposure incidents" OR "splash exposures" OR "splash exposure" OR needle-sticks OR "sharp objects" OR sharps OR "percutaneous injuries" OR "percutaneous injury"</p> <p>4. "manual handling injury" OR "manual handling injuries" OR "musculoskeletal injury" OR "musculoskeletal injuries"</p> <p>5. "chemical occupational exposure" OR "exposure to inhaled anesthetic" OR "reagent exposure" OR "exposure to reagent" OR "exposure to solvents" OR "solvent exposure" OR "exposure to detergents" OR "detergent exposure"</p> <p>6. "slips, trips and falls" OR "slipping, tripping and falling accidents" OR "accidental fall" OR "same-level fall" OR "same-surface fall" OR stump-and-fall OR step-and-fall OR "forced-rotation-type fall" OR "fall from elevation"</p> <p>7. "violent events" OR violence OR assault OR assaults</p> <p>8. "cuts and wounds" OR "burns"</p> |

|    |                                                                          |
|----|--------------------------------------------------------------------------|
| 1  |                                                                          |
| 2  |                                                                          |
| 3  | 9. "motor vehicle accidents" OR "motor vehicle accident" OR "motor       |
| 4  | vehicle collisions" OR "motor vehicle collision" OR "motor vehicle       |
| 5  | crash" OR "motor vehicle crashes" OR "motor vehicle near crash" OR       |
| 6  | "motor vehicle near crashes"                                             |
| 7  |                                                                          |
| 8  | 10. "exposure to ionizing radiation" OR "radiation exposure"             |
| 9  |                                                                          |
| 10 | 1. AND 2. OR 3. OR 4. OR 5. OR 6. OR 7. OR 8. OR 9. OR 10.               |
| 11 |                                                                          |
| 12 | Inclusion criteria                                                       |
| 13 | P: medical/paramedical students and residents, doctors and nurses,       |
| 14 | cleaners and porters                                                     |
| 15 | E: exposure to biological, chemical, physical/ergonomic risk and         |
| 16 | hazard                                                                   |
| 17 | C: medical versus nursing or dental students; students versus residents; |
| 18 | medical versus nursing or dental trainees/residents; before and after a  |
| 19 | preventive program                                                       |
| 20 | O: prevalence/incidence of injuries and their determinants among         |
| 21 | healthcare workers in Western countries, related disabilities and        |
| 22 | absence from work, and generated economic burden (direct/indirect        |
| 23 | costs)                                                                   |
| 24 | S: primary research                                                      |
| 25 | Exclusion criteria                                                       |
| 26 | Editorial, letter to the editor, commentary, review                      |
| 27 | Target journals                                                          |
| 28 | Occupational and public health journals                                  |
| 29 |                                                                          |
| 30 |                                                                          |
| 31 |                                                                          |
| 32 |                                                                          |
| 33 |                                                                          |
| 34 |                                                                          |
| 35 |                                                                          |
| 36 |                                                                          |
| 37 |                                                                          |
| 38 |                                                                          |
| 39 |                                                                          |
| 40 |                                                                          |
| 41 |                                                                          |
| 42 |                                                                          |
| 43 |                                                                          |
| 44 |                                                                          |
| 45 |                                                                          |
| 46 |                                                                          |
| 47 |                                                                          |
| 48 |                                                                          |
| 49 |                                                                          |
| 50 |                                                                          |
| 51 |                                                                          |
| 52 |                                                                          |
| 53 |                                                                          |
| 54 |                                                                          |
| 55 |                                                                          |
| 56 |                                                                          |
| 57 |                                                                          |
| 58 |                                                                          |
| 59 |                                                                          |
| 60 |                                                                          |

**Table 2. Data planned to be extracted and details/explanations.**

| EXTRACTED DATA                                     | DETAILS                                                                                                                                                                                                       |
|----------------------------------------------------|---------------------------------------------------------------------------------------------------------------------------------------------------------------------------------------------------------------|
| Study Reference                                    | Names and surnames of authors, year of publication                                                                                                                                                            |
| Study population                                   | Physicians, doctors, nurses, medical students, residents, cleaners, porters                                                                                                                                   |
| Country                                            | Country or countries in which the study or studies was or were carried out                                                                                                                                    |
| Study design                                       | Type of recruitment                                                                                                                                                                                           |
| M%                                                 | Percentage of male healthcare workers                                                                                                                                                                         |
| Age                                                | Mean age of healthcare workers sample                                                                                                                                                                         |
| Sample number, attrition rate                      | Number of healthcare workers who took part into the survey, number of non responders                                                                                                                          |
| Professional/experience years                      | Years spent in profession by healthcare workers included in the study                                                                                                                                         |
| Working setting                                    | Hospital ward where the injury occurred (for example, emergency room, obstetrics department, surgery department, operating room, outpatient clinic, department of Internal Medicine, patients' room, CCU/ICU) |
| Injury prevalence/incidence rate                   | Prevalence/incidence rates stratified according to the kind of injury                                                                                                                                         |
| Method                                             | Questionnaire (validated, not validated)                                                                                                                                                                      |
| Following standard procedures                      | Prevalence/incidence rates stratified according to the compliance to procedures and guidelines among the different types of healthcare workers                                                                |
| Knowledge, attitudes and practices about PEP       | Prevalence/incidence rates stratified according to the knowledge, attitudes and practices concerning PEP, among the different types of healthcare workers                                                     |
| Clerkship abroad                                   | Periods of training abroad; type of task(s) the healthcare worker was involved in during the training period abroad                                                                                           |
| Reporting/non-reporting to Occupational Department | Prevalence/incidence rates stratified according                                                                                                                                                               |



---

|    |                                                 |
|----|-------------------------------------------------|
| 1  |                                                 |
| 2  |                                                 |
| 3  | to the determinants of the reporting/non-       |
| 4  | reporting, among the different types of         |
| 5  | healthcare workers                              |
| 6  |                                                 |
| 7  | Injuries-related burden                         |
| 8  | Number of days of absence from work,            |
| 9  | disabilities and economic direct/indirect costs |
| 10 | due to injuries                                 |
| 11 |                                                 |
| 12 |                                                 |

---

For peer review only



1  
2  
3  
4  
5  
6  
7  
8  
9  
10  
11  
12  
13  
14  
15  
16  
17  
18  
19  
20  
21  
22  
23  
24  
25  
26  
27  
28  
29  
30  
31  
32  
33  
34  
35  
36  
37  
38  
39  
40  
41  
42  
43  
44  
45  
46  
47  
48  
49  
50  
51  
52  
53  
54  
55  
56  
57  
58  
59  
60

Figures.

Figure 1. Flowchart of selection of studies according to the “Preferred Reporting Items for Systematic Reviews and Meta-analyses” (PRISMA) guidelines.

For peer review only

### **Contributors**

NLB, GD, VP, CB, RL, VM, AT, FB, BDA, EM, AM, ND, and PD conceived the idea. NLB, GD, VM, AT, and PD developed the research questions. NLB, GD, and PD developed the study methods. VP, CB, RL, FB, BDA, EM, AM, and ND aided in developing the research question and study methods. All authors participated in drafting the article, editing or revising it critically for important intellectual content; all authors gave final approval of the version to be submitted and any revised version.

### **Funding**

This research was co-funded by the "Istituto Nazionale per l'Assicurazione contro gli Infortuni sul Lavoro (INAIL, National Institute for Insurance Against Accidents at Work)" and the Department of Health Sciences, Occupational Medicine - University of Genoa, Italy.

### **Competing interests**

None declared.

### **Patient consent**

Not required.

1  
2  
3  
4  
5  
6  
7  
8  
9  
10  
11  
12  
13  
14  
15  
16  
17  
18  
19  
20  
21  
22  
23  
24  
25  
26  
27  
28  
29  
30  
31  
32  
33  
34  
35  
36  
37  
38  
39  
40  
41  
42  
43  
44  
45  
46  
47  
48  
49  
50  
51  
52  
53  
54  
55  
56  
57  
58  
59  
60

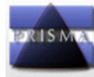

**PRISMA 2009 Flow Diagram**

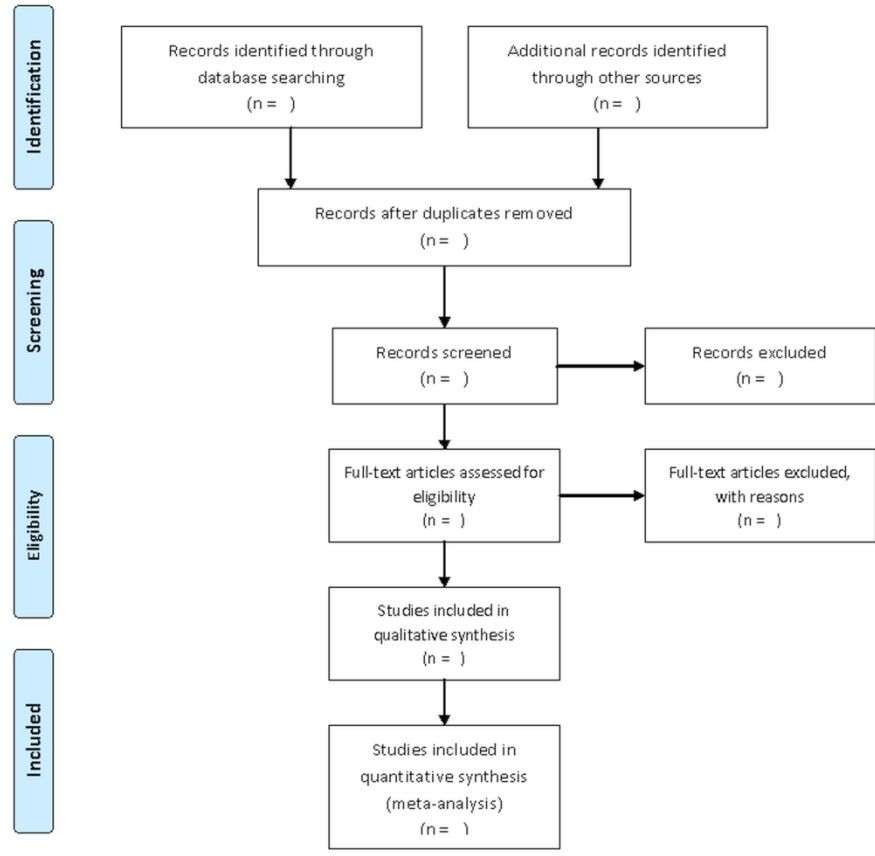

Flowchart of selection of studies according to the "Preferred Reporting Items for Systematic Reviews and Meta-analyses" (PRISMA) guidelines.

226x236mm (300 x 300 DPI)

**PRISMA-P (Preferred Reporting Items for Systematic review and Meta-Analysis Protocols) 2015 checklist: recommended items to address in a systematic review protocol\***

| Section and topic                 | Item No | Checklist item                                                                                                                                                                                  | Page of the documents and details                                                                                                                                                                                                                           |
|-----------------------------------|---------|-------------------------------------------------------------------------------------------------------------------------------------------------------------------------------------------------|-------------------------------------------------------------------------------------------------------------------------------------------------------------------------------------------------------------------------------------------------------------|
| <b>ADMINISTRATIVE INFORMATION</b> |         |                                                                                                                                                                                                 |                                                                                                                                                                                                                                                             |
| Title:                            |         |                                                                                                                                                                                                 |                                                                                                                                                                                                                                                             |
| Identification                    | 1a      | Identify the report as a protocol of a systematic review                                                                                                                                        | Protocol of a scoping review assessing injury rate and determinants among healthcare workers in Western countries (page 1)                                                                                                                                  |
| Update                            | 1b      | If the protocol is for an update of a previous systematic review, identify as such                                                                                                              |                                                                                                                                                                                                                                                             |
| Registration                      | 2       | If registered, provide the name of the registry (such as PROSPERO) and registration number                                                                                                      | In accordance with these guidelines, the scoping review protocol has been submitted to the International Prospective Register of Systematic Reviews (PROSPERO). However, currently, PROSPERO does not accept to register scoping review protocols (page 8). |
| Authors:                          |         |                                                                                                                                                                                                 |                                                                                                                                                                                                                                                             |
| Contact                           | 3a      | Provide name, institutional affiliation, e-mail address of all protocol authors; provide physical mailing address of corresponding author                                                       | Page 1 and page 21. Furthermore, role of each author is outlined in the protocol.                                                                                                                                                                           |
| Contributions                     | 3b      | Describe contributions of protocol authors and identify the guarantor of the review                                                                                                             |                                                                                                                                                                                                                                                             |
| Amendments                        | 4       | If the protocol represents an amendment of a previously completed or published protocol, identify as such and list changes; otherwise, state plan for documenting important protocol amendments | The present protocol is not an amendment.                                                                                                                                                                                                                   |
| Support:                          |         |                                                                                                                                                                                                 |                                                                                                                                                                                                                                                             |
| Sources                           | 5a      | Indicate sources of financial or other support for the review                                                                                                                                   | Sources and the role of the sponsor are indicated at page 7 and at page 21.                                                                                                                                                                                 |
| Sponsor                           | 5b      | Provide name for the review funder and/or sponsor                                                                                                                                               |                                                                                                                                                                                                                                                             |
| Role of sponsor or funder         | 5c      | Describe roles of funder(s), sponsor(s), and/or institution(s), if any, in developing the protocol                                                                                              |                                                                                                                                                                                                                                                             |
| <b>INTRODUCTION</b>               |         |                                                                                                                                                                                                 |                                                                                                                                                                                                                                                             |
| Rationale                         | 6       | Describe the rationale for the review in the context of what is already known                                                                                                                   | Rationale is provided in the background (pages 4-6).                                                                                                                                                                                                        |
| Objectives                        | 7       | Provide an explicit statement of the question(s) the review will                                                                                                                                | Page 7.                                                                                                                                                                                                                                                     |

1  
2  
3  
4  
5  
6  
7  
8  
9  
10  
11  
12  
13  
14  
15  
16  
17  
18  
19  
20  
21  
22  
23  
24  
25  
26  
27  
28  
29  
30  
31  
32  
33  
34  
35  
36  
37  
38  
39  
40  
41  
42  
43  
44  
45  
46  
47

address with reference to participants, interventions, comparators, and outcomes (PICO)

**METHODS**

|                                   |     |                                                                                                                                                                                                                               |                     |
|-----------------------------------|-----|-------------------------------------------------------------------------------------------------------------------------------------------------------------------------------------------------------------------------------|---------------------|
| Eligibility criteria              | 8   | Specify the study characteristics (such as PICO, study design, setting, time frame) and report characteristics (such as years considered, language, publication status) to be used as criteria for eligibility for the review | Page 8 and table 1. |
| Information sources               | 9   | Describe all intended information sources (such as electronic databases, contact with study authors, trial registers or other grey literature sources) with planned dates of coverage                                         | Page 8 and table 1. |
| Search strategy                   | 10  | Present draft of search strategy to be used for at least one electronic database, including planned limits, such that it could be repeated                                                                                    | Page 8 and table 1. |
| Study records:<br>Data management | 11a | Describe the mechanism(s) that will be used to manage records and data throughout the review                                                                                                                                  | Pages 8-9.          |

Peer review only

|                                    |     |                                                                                                                                                                                                                                                  |       |
|------------------------------------|-----|--------------------------------------------------------------------------------------------------------------------------------------------------------------------------------------------------------------------------------------------------|-------|
|                                    |     |                                                                                                                                                                                                                                                  | Pages |
| Selection process                  | 11b | State the process that will be used for selecting studies (such as two independent reviewers) through each phase of the review (that is, screening, eligibility and inclusion in meta-analysis)                                                  | 8-9   |
|                                    |     |                                                                                                                                                                                                                                                  | Pages |
| Data collection process            | 11c | Describe planned method of extracting data from reports (such as piloting forms, done independently, in duplicate), any processes for obtaining and confirming data from investigators                                                           | 8-9   |
|                                    |     |                                                                                                                                                                                                                                                  | Table |
| Data items                         | 12  | List and define all variables for which data will be sought (such as PICO items, funding sources), any pre-planned data assumptions and simplifications                                                                                          | 2.    |
|                                    |     |                                                                                                                                                                                                                                                  | Table |
| Outcomes and prioritization        | 13  | List and define all outcomes for which data will be sought, including prioritization of main and additional outcomes, with Rationale                                                                                                             | 2.    |
|                                    |     |                                                                                                                                                                                                                                                  | Pages |
| Risk of bias in individual studies | 14  | Describe anticipated methods for assessing risk of bias of individual studies, including whether this will be done at the outcome or study level, or both; state how this information will be used in data synthesis                             | 8-10  |
|                                    |     |                                                                                                                                                                                                                                                  | Pages |
| Data synthesis                     | 15a | Describe criteria under which study data will be quantitatively synthesised                                                                                                                                                                      | 8-10  |
|                                    | 15b | If data are appropriate for quantitative synthesis, describe planned summary measures, methods of handling data and methods of combining data from studies, including any planned exploration of consistency (such as $I^2$ , Kendall's $\tau$ ) |       |
|                                    | 15c | Describe any proposed additional analyses (such as sensitivity or subgroup analyses, meta-regression)                                                                                                                                            |       |
|                                    | 15d | If quantitative synthesis is not appropriate, describe the type of summary planned                                                                                                                                                               |       |
|                                    |     |                                                                                                                                                                                                                                                  | Pages |
| Meta-bias(es)                      | 16  | Specify any planned assessment of meta-bias(es) (such as publication bias across studies, selective reporting within studies)                                                                                                                    | 8-10  |
|                                    |     |                                                                                                                                                                                                                                                  | Page  |
| Confidence in cumulative evidence  | 17  | Describe how the strength of the body of evidence will be assessed (such as GRADE)                                                                                                                                                               | 10    |

**\* It is strongly recommended that this checklist be read in conjunction with the PRISMA-P Explanation and Elaboration (cite when available) for important clarification on the items. Amendments to a review protocol should be tracked and dated. The copyright for PRISMA-P (including checklist) is held by the PRISMA-P Group and is distributed under a Creative Commons Attribution Licence 4.0.**

*From: Shamseer L, Moher D, Clarke M, Ghersi D, Liberati A, Petticrew M, Shekelle P, Stewart L, PRISMA-P Group. Preferred reporting items for systematic review and meta-analysis protocols (PRISMA-P) 2015: elaboration and explanation. BMJ. 2015 Jan 2;349(jan02 1):g7647.*

# BMJ Open

## Protocol of a scoping review assessing injury rate and its determinants among healthcare workers in Western countries

|                                 |                                                                                                                                                                                                                                                                                                                                                                                                                                                                                                                                                                                                                                                                                                                                                                                                                                                                                                                                                                                                                                                                                                                                                                                                                                                                                                                                                                                                                                                                                                                                                                                                                                                                                                                                                                                                                                                                                                                                                                                                                                    |
|---------------------------------|------------------------------------------------------------------------------------------------------------------------------------------------------------------------------------------------------------------------------------------------------------------------------------------------------------------------------------------------------------------------------------------------------------------------------------------------------------------------------------------------------------------------------------------------------------------------------------------------------------------------------------------------------------------------------------------------------------------------------------------------------------------------------------------------------------------------------------------------------------------------------------------------------------------------------------------------------------------------------------------------------------------------------------------------------------------------------------------------------------------------------------------------------------------------------------------------------------------------------------------------------------------------------------------------------------------------------------------------------------------------------------------------------------------------------------------------------------------------------------------------------------------------------------------------------------------------------------------------------------------------------------------------------------------------------------------------------------------------------------------------------------------------------------------------------------------------------------------------------------------------------------------------------------------------------------------------------------------------------------------------------------------------------------|
| Journal:                        | <i>BMJ Open</i>                                                                                                                                                                                                                                                                                                                                                                                                                                                                                                                                                                                                                                                                                                                                                                                                                                                                                                                                                                                                                                                                                                                                                                                                                                                                                                                                                                                                                                                                                                                                                                                                                                                                                                                                                                                                                                                                                                                                                                                                                    |
| Manuscript ID                   | bmjopen-2018-023372.R2                                                                                                                                                                                                                                                                                                                                                                                                                                                                                                                                                                                                                                                                                                                                                                                                                                                                                                                                                                                                                                                                                                                                                                                                                                                                                                                                                                                                                                                                                                                                                                                                                                                                                                                                                                                                                                                                                                                                                                                                             |
| Article Type:                   | Protocol                                                                                                                                                                                                                                                                                                                                                                                                                                                                                                                                                                                                                                                                                                                                                                                                                                                                                                                                                                                                                                                                                                                                                                                                                                                                                                                                                                                                                                                                                                                                                                                                                                                                                                                                                                                                                                                                                                                                                                                                                           |
| Date Submitted by the Author:   | 11-Oct-2018                                                                                                                                                                                                                                                                                                                                                                                                                                                                                                                                                                                                                                                                                                                                                                                                                                                                                                                                                                                                                                                                                                                                                                                                                                                                                                                                                                                                                                                                                                                                                                                                                                                                                                                                                                                                                                                                                                                                                                                                                        |
| Complete List of Authors:       | <p>Bragazzi, Nicola; Department of Health Sciences (DISSAL), Postgraduate School of Occupational Medicine, University of Genoa<br/> Dini, Guglielmo; Department of Health Sciences (DISSAL), Postgraduate School of Occupational Medicine, University of Genoa; Occupational Medicine Unit, Policlinico San Martino Hospital<br/> Parodi, Valentina; Department of Health Sciences (DISSAL), Postgraduate School of Occupational Medicine, University of Genoa<br/> Blasi, Carlo; Liguria Regional Directorate, National Institution for Insurance Against Accidents at Work (INAIL)<br/> Linares, Roberta; Liguria Regional Directorate, National Institution for Insurance Against Accidents at Work (INAIL)<br/> Mortara, Virginia; Liguria Regional Directorate, National Institution for Insurance Against Accidents at Work (INAIL)<br/> Toletone, Alessandra; Department of Health Sciences (DISSAL), Postgraduate School of Occupational Medicine, University of Genoa; Occupational Medical Service, Local Health Unit 1, Liguria Regional Healthcare System<br/> Bersi, Francesca; Department of Health Sciences (DISSAL), Postgraduate School of Occupational Medicine, University of Genoa<br/> D'Amico, Beatrice; Department of Health Sciences (DISSAL), Postgraduate School of Occupational Medicine, University of Genoa; Occupational Medicine Unit, Policlinico San Martino Hospital<br/> Massa, Emanuela; Department of Health Sciences (DISSAL), Postgraduate School of Occupational Medicine, University of Genoa<br/> Montecucco, Alfredo; Department of Health Sciences (DISSAL), Postgraduate School of Occupational Medicine, University of Genoa; Occupational Medicine Unit, Policlinico San Martino Hospital<br/> Debarbieri, Nicoletta; Occupational Medicine Unit, Policlinico San Martino Hospital<br/> Durando, Paolo; Department of Health Sciences (DISSAL), Postgraduate School of Occupational Medicine, University of Genoa; Occupational Medicine Unit, Policlinico San Martino Hospital</p> |
| <b>Primary Subject Heading</b>: | Occupational and environmental medicine                                                                                                                                                                                                                                                                                                                                                                                                                                                                                                                                                                                                                                                                                                                                                                                                                                                                                                                                                                                                                                                                                                                                                                                                                                                                                                                                                                                                                                                                                                                                                                                                                                                                                                                                                                                                                                                                                                                                                                                            |
| Secondary Subject Heading:      | Epidemiology                                                                                                                                                                                                                                                                                                                                                                                                                                                                                                                                                                                                                                                                                                                                                                                                                                                                                                                                                                                                                                                                                                                                                                                                                                                                                                                                                                                                                                                                                                                                                                                                                                                                                                                                                                                                                                                                                                                                                                                                                       |
| Keywords:                       | healthcare workers, injuries, scoping review protocol                                                                                                                                                                                                                                                                                                                                                                                                                                                                                                                                                                                                                                                                                                                                                                                                                                                                                                                                                                                                                                                                                                                                                                                                                                                                                                                                                                                                                                                                                                                                                                                                                                                                                                                                                                                                                                                                                                                                                                              |

1  
2  
3  
4  
5  
6  
7  
8  
9  
10  
11  
12  
13  
14  
15  
16  
17  
18  
19  
20  
21  
22  
23  
24  
25  
26  
27  
28  
29  
30  
31  
32  
33  
34  
35  
36  
37  
38  
39  
40  
41  
42  
43  
44  
45  
46  
47  
48  
49  
50  
51  
52  
53  
54  
55  
56  
57  
58  
59  
60



SCHOLARONE™  
Manuscripts



Revised. To be submitted to BMJ Open

**Protocol of a scoping review assessing injury rate and its determinants among healthcare workers in Western countries**

Nicola Luigi Bragazzi<sup>1\*</sup>, Guglielmo Dini<sup>1,2\*</sup>, Valentina Parodi<sup>1</sup>, Carlo Blasi<sup>3</sup>, Roberta Linares<sup>3</sup>, Virginia Mortara<sup>3</sup>, Alessandra Toletone<sup>1,4</sup>, Francesca Bersi<sup>1</sup>, Beatrice D'amico<sup>1,2</sup>, Emanuela Massa<sup>1</sup>, Alfredo Montecucco<sup>1,2</sup>, Nicoletta Debarbieri<sup>2</sup>, Paolo Durando<sup>1,2</sup>

<sup>1</sup>Department of Health Sciences (DISSAL), Postgraduate School of Occupational Medicine, University of Genoa, Italy

<sup>2</sup>Occupational Medicine Unit, Policlinico San Martino Hospital, Genoa, Italy

<sup>3</sup>Liguria Regional Directorate, National Institute for Insurance Against Accidents at Work/ Istituto nazionale per l'assicurazione contro gli infortuni sul lavoro (INAIL)

<sup>4</sup>Occupational Medical Service, Local Health Unit 1, Liguria Regional Healthcare System, Imperia, Italy

\* These authors contributed equally to this work.

\*Corresponding Author:

Prof. Dr. Paolo Durando, MD, PhD,

Department of Health Sciences (DISSAL), Postgraduate School of Occupational Medicine, University of Genoa and Occupational Medicine Unit, Policlinic San Martino Hospital, Genoa, Italy

Largo R. Benzi 10 (Building 3), 16132 Genoa, Italy

Phone: 0039 0103538133

Fax: 0039 010505618

E-mail: durando@unige.it

## ABSTRACT

**Introduction:** Healthcare workers (HCWs) are subject to different risk factors and risky behaviors that can have a serious impact on their health and work capability. The aim of this protocol is to detail the steps for carrying out a scoping review assessing the prevalence/incidence of injuries among HCWs.

**Methods and analysis:** The study will be carried out following the “Preferred Reporting Items for Systematic reviews and Meta-Analysis” (PRISMA) guidelines. Studies will be selected according to the following PECO criteria: P (HCWs), E (exposure to injuries), C (different types of HCWs) and O (prevalence/incidence and determinants of injuries). Time filter has been set considering literature between 2000 and 2018 to enable a direct comparison of the findings with the epidemiological figures available at national and local "Istituto Nazionale per l'Assicurazione contro gli Infortuni sul Lavoro" (National Institute for Insurance Against Accidents at Work, INAIL) centers in Italy. No language restriction will be applied.

**Ethics and dissemination:** Formal ethical approval is not required as primary data will not be collected, being already published. The results will be disseminated through peer-reviewed publication(s), conference presentation(s) and the popular press.

**Key terms:** healthcare workers; injuries; scoping review protocol

### Strengths and limitations of this study

- In the existing scholarly literature, there is not a comprehensive and broad review of studies performed in Western Countries concerning injuries among healthcare workers .
- Stratifying according to the work tasks and type of injuries could add meaningful information.
- A further strength is the lack of any language filter..
- A major limitation concerns time filter, which, on the other hand, enables a direct comparison of the findings with the epidemiological figures available at national and local "Istituto Nazionale per l'Assicurazione contro gli Infortuni sul Lavoro" (National Institute for Insurance Against Accidents at Work, INAIL) centers.

## BACKGROUND

The healthcare system represents the fastest growing sector in Western economy and employs millions of workers, over 18 million in the United States and more than 59 million worldwide.<sup>1</sup> Healthcare workers (HCWs) is an umbrella term, which refers to all people engaged in the promotion, protection or improvement of the health of the population. This term includes a variety of different figures, ranging from medical doctors (like specialists, pediatricians, and general practitioners), to midwives and nurses, other health allied professionals, central supply workers and technicians, as well as residents.<sup>2-4</sup>

Different variables may act as risk factors and impact on HCWs' health and safety, which could, in turn, lead to injuries or disorders. These include: the characteristics of the HCWs (age, gender, education, smoking status, and other lifestyle habits), as well as the features of the patient under care (namely, socio-demographic characteristics of the patient and type of disease) and of the hospital setting (for example, organization, workload, or night shifts).

As with other working settings, hospitals are not completely safe workplace environments for professionals. HCWs can be exposed to several occupational health hazards, resulting in a relevant clinical, economic and humanistic burden. Injury rates among HCWs constitute the highest injury rates, among all type of workers, in Western countries.<sup>5,6</sup> Occupational hazards include biological ones (such as infections, like HAV, HBV, HCV, influenza, HIV/AIDS, measles, mumps, rubella, varicella, tuberculosis, pertussis or meningitis, among others).<sup>7-15</sup> They represent an important occupational health problem, as most of them are blood-borne diseases, which can be acquired through needle-stick or sharp injuries. HCWs have contact with infected patients and their body fluids. An important factor is that HCWs are at risk for repeated performance of exposure prone procedures (EPPs) that may cause injuries to employees. These include surgeons, midwives, microbiologists, pathologists, blood bank and dialysis staff. According to a recent review by Cooke and Stephens, in 2015, a needle-stick injury generated a cost of 747 dollars (range 199-1,691 dollars).<sup>16</sup> Prüss-Ustün and collaborators, using mathematical modeling, estimated the global burden of infections due to percutaneous injuries among HCWs. More in detail, this was done on the probability of injury, the prevalence of infection, the susceptibility of the worker and the percutaneous transmission potential. In Western countries, 1,510 HCV, 360 HBV and 11 HIV cases occurred in the year 2000, ranging from 8-27%, 1-8% and 0,5-3,1% of infections, respectively.<sup>17</sup> Incidence rates of sharps injuries ranged from 1.4 to 9.5 per 100 HCWs, with a weighted mean of 3.7/100 HCWs *per year* and a related societal mean cost of €272.<sup>18</sup> According to Deuffic-Burban and colleagues, the risk of transmission of blood-borne pathogens infections is

1  
2  
3 estimated to be 30% in susceptible HCWs without post-exposure prophylaxis (PEP) or adequate  
4 hepatitis B vaccination, 0-0.5%, and <0.3%, for HBV, HCV and HIV, respectively. Adopting  
5 preventive measures such as following standard precautions or undertaking training sessions targeted  
6 for both long-term HCWs, students and residents at risk can lead to a reduction in the incidence of  
7 occupational exposure, and, therefore, of percutaneous injuries (PIs). For instance, in France, the  
8 proportion of PIs preventable by taking standard precautions decreased from 52.5% in 2004 to 45.8%  
9 in 2008.<sup>19</sup>

15 Other hazards are ergonomic/physical. The category of musculoskeletal injuries represents one of the  
16 highest categories of accidents among HCWs, due to patient handling and overexertion.  
17 Musculoskeletal injuries can involve body structures, such as muscles, nerves, tendons and ligaments,  
18 joints and cartilage, due to factors like repetition, force, awkward postures, contact stress or vibration.  
19 Healthcare personnel members dedicated to patient care, as well as to hospital housekeeping, laundry,  
20 and food service, maintenance, central supply and office, are susceptible to such injuries. Patient-  
21 handling injuries are caused by manually lifting patients, who are generally more overweight and obese  
22 than in the past. As such, a "Safe Patient Handling – No Manual Lift" policy should be adopted in order  
23 to prevent such accidents. This is especially of value, given the actual shortage of HCWs and, in  
24 particular, of nurses, and the importance of early mobilizing patients and assisting them with physical  
25 activities.<sup>20,21</sup> According to some epidemiological surveys, up to two thirds of nurses have suffered  
26 from musculoskeletal disorders at least once in their working life for at least 14 days.<sup>22</sup> Physical  
27 therapists are another type of HCWs with direct patient contact at high risk for developing  
28 musculoskeletal disorders. According to a recent comprehensive narrative review, their lifetime and  
29 yearly prevalence rates are 55-91% and 40-91.3%, respectively. Injuries generally affect lower back,  
30 neck, upper back and shoulders.<sup>23</sup>

43 Physical violence represents another occupational hazard, which severely impacts on HCWs' well-  
44 being and job motivation, affecting health-care provision and quality.<sup>24</sup> According to the World Health  
45 Organization (WHO) estimates, from 8% to 38% of HCWs have suffered from assaults perpetrated by  
46 patients or visitors at least once, at some point in their careers. Recently, the WHO, the "International  
47 Labor Organization" (ILO), the "International Council of Nurses" (ICN) and the "Public Services  
48 International" (PSI) have jointly developed a guideline entitled "Framework guidelines for addressing  
49 workplace violence in the health sector".<sup>25</sup> Physical violence represents a major source of injuries  
50 among HCWs, especially those working in psychiatric wards.<sup>26</sup> According to a recent review of the  
51 literature, in acute psychiatric units, lifetime rates of overall assaults, physical and verbal threats and  
52  
53  
54  
55  
56  
57  
58  
59

1  
2  
3 sexual harassment are 24-80%, 46-78.6%, 43-78.6% and 9.5-37.2%, respectively. Complications of  
4 such episodes include fractures, eye injuries, and permanent disability, as well as psychological  
5 symptoms, such as anxiety, depression, post-traumatic stress disorder (PTSD), or avoidance  
6 behavior.<sup>27,28</sup> Another hospital ward in which violence/assault can be experienced is the emergency  
7 department (ED): according to a recent qualitative meta-synthesis, ED staff perceives aggression as  
8 unavoidable and feels isolated in its management.<sup>29</sup> Aggressors usually suffer from psychiatric  
9 disorders, have a history of drug and alcohol use, possess weapons, are victims of violence and are  
10 unable to rationally cope with situational crises.<sup>30</sup> In recent years, a rise in the number of assault  
11 episodes against HCWs has been observed: for example, in a University teaching hospital in the  
12 northern part of Italy, non-fatal violence events increased from 20.65/10,000 in 2012 to 22.81/10,000 in  
13 2014, resulting in 431 days of absence from work and generating a direct cost of € 64,170. Up to 75%  
14 of violent episodes occurred in emergency room, intermediate care, psychiatry and geriatrics wards.<sup>31</sup>

15  
16  
17  
18  
19  
20  
21  
22  
23  
24  
25 Less common sources of injuries among HCWs are represented by chemical exposure (inhalation of  
26 anesthetics, solvents, detergents or reagents)<sup>32</sup> or exposure to physical agents (such as ionizing and non  
27 ionizing radiations).<sup>33</sup>

28  
29  
30  
31  
32  
33  
34  
35  
36  
37  
38  
39  
40  
41  
42  
43  
44  
45  
46  
47  
48  
49  
50  
51  
52  
53  
54  
55  
56  
57  
58  
59  
60  
A particular type of injury is also known to occur among commuters. Some scholars conducted  
research among shift and non-shift workers and found a strict, statistically significant relationship  
between shift-work condition and the presence of excess daytime sleepiness.<sup>34-37</sup> Due to workforce  
shortage, high workloads, and night shifts, 32% of HCWs report not to get enough sleep.<sup>36</sup>

Systematically identifying and, then, intervening to alter workplace conditions associated with  
exposure to health hazards may be an important tool for primary prevention.<sup>38</sup>

## METHODS

### Review title

The current review protocol is titled "Protocol of a scoping review assessing injury rate and its  
determinants among healthcare workers in Western countries". The title was guided by the so-called  
'PCC' mnemonic (namely, Population, Concept and Context) used by the Joanna Briggs Institute (JBI).  
Structuring the title according to the PCC mnemonic enables to clearly reflect and incorporate the core  
information about the focus and scope of the review.

### Review questions

1  
2  
3 The review questions are: i) What is the incidence/prevalence rate of injuries among HCWs in Western  
4 countries? ii) What are the determinants of injuries among HCWs in Western countries? iii) What is the  
5 type of injury most commonly occurring among HCWs in Western countries? iv) Among the different  
6 professional figures within the umbrella term of HCWs, which one(s) is/are the most affected by  
7 injuries in Western countries? v) What is the burden imposed by injuries among HCWs in terms of  
8 related disabilities, residual working capability, absence from work and generated direct/indirect costs?  
9 vi) What are the state-of-art preventive measures that can be adopted in order to effectively reduce  
10 injuries among HCWs in Western countries?  
11  
12  
13  
14  
15  
16

### 17 **Review objective**

18 The study aim will be to map the existing literature concerning injury rate among HCWs in Western  
19 countries and its determinants. As such, the main “*end product ... [will be] ... a narrative presentation,*  
20 *with minimal or limited statistical information*”.<sup>39</sup>  
21  
22  
23

### 24 **Study design**

25 In order to properly address the research questions, a scoping review will be performed using the 6-  
26 stage methodological framework initially proposed by Arksey and O'Malley.<sup>40</sup> This framework  
27 comprises 6 steps: namely, i) identifying the research question(s); ii) identifying relevant studies; iii)  
28 study selection; iv) charting the data; v) collating, summarizing and reporting the results; and vi)  
29 consultation exercise.<sup>41</sup> The conceptual scheme has been made more detailed and explicit by Levac,  
30 Colquhoun and O'Brien,<sup>42</sup> further refined by Colquhoun and collaborators,<sup>43</sup> and subsequently  
31 modified by the JBI in the "JBI scoping review methods" manual.<sup>39,44</sup>  
32  
33  
34  
35  
36  
37

38 Scoping review is one of the fourteen kinds of literature synthesis, according to the “Search, Appraisal,  
39 Synthesis and Analysis” (SALSA) framework.<sup>45</sup> In detail, it is a review whose “*aim [is] to map rapidly*  
40 *the key concepts underpinning a research area and the main sources and types of evidence available,*  
41 *and can be undertaken as stand-alone projects in their own right, especially where an area is complex*  
42 *or has not been reviewed comprehensively before*”.<sup>46</sup> This specifies a literature search conducted with  
43 one or more broad research questions, and performed in an iterative way to familiarize with the entire  
44 literature, to gain a sense of it and to map it properly. Search restrictive/selective parameters can be  
45 preliminarily set. The results are obtained specifying inclusion and exclusion criteria and, thus,  
46 delimiting the outcome(s) of the literature search, similarly to systematic review, but also time  
47 constraints and space filters are allowed, for example, utilizing deadlines for searching and  
48 inclusion/exclusion criteria for study retention. Data are, then, abstracted and reported in a synthetic  
49 format (tables, charts, etc.).  
50  
51  
52  
53  
54  
55  
56  
57  
58  
59  
60



1  
2  
3 The specific methodology of the scoping review was chosen to take into account both the nature and  
4 the specific requests of a national project co-funded and performed in collaboration between the  
5 Department of Health Sciences (DISSAL), Occupational Medicine - University of Genoa, Italy, and the  
6 "Istituto Nazionale per l'Assicurazione contro gli Infortuni sul Lavoro" (in Italian, "National Institute  
7 for Insurance Against Accidents at Work", INAIL). This required a quick assessment of a diverse  
8 amount of scholarly literature, aiming more for breadth rather than for depth. As such, other types of  
9 review identified by the SALSA framework were not deemed methodologically effective, such as  
10 systematic reviews, umbrella reviews or rapid reviews.  
11

12 As maintained by Arksey and O'Malley,<sup>40</sup> scoping reviews may be utilized to assess the topology of a  
13 vast body of literature, in terms of current gaps of knowledge and future prospects. These aims  
14 corresponded to the objective of our project.  
15

### 16 **Drafting and registration of the study protocol**

17 This *a priori* protocol is reported in such a way that the objectives and methods of the scoping review  
18 are clearly stated and pre-defined, according to the Preferred Reporting Items for Systematic Reviews  
19 and Meta-Analysis – Protocols (PRISMA-P) guidelines.<sup>47</sup> However, despite the recommendation of  
20 these guidelines, it was not possible to register the scoping review protocol in the "International  
21 Prospective Register of Systematic Reviews" (PROSPERO),<sup>48</sup> in that it, currently, does not accept  
22 scoping review protocols.  
23

24 The results of the study will be reported in line with the PRISMA guidelines (Figure 1).<sup>49</sup>  
25

### 26 **Identifying the research question(s)**

27 The research questions and objective have been formulated and shaped as they are stated in the  
28 previous sections "Review questions" and "Review objective".  
29

### 30 **Identifying relevant studies**

31 A systematic literature search will be performed in the MEDLINE (NLM), Scopus, SciVerse  
32 ScienceDirect, Science Citation Index Expanded and Social Sciences Citation Index from ISI/Web of  
33 Science, ProQuest Research Library, ABI/INFORM, CBCA, *via* the UNO per TUTTI Primo Central  
34 (Ex Libris) platform databases.  
35

36 This will include all studies reporting epidemiological figures of injuries among HCWs in Western  
37 countries in terms of prevalence/incidence rates. The search will be performed using a proper string of  
38  
39  
40  
41  
42  
43  
44  
45  
46  
47  
48  
49  
50  
51  
52  
53  
54  
55  
56  
57  
58  
59  
60



1  
2  
3 search terms (**Table 1**). The search strategy will be adapted for the other databases. Additionally, we  
4 will search reference lists of the chosen studies and prior reviews. When it will not be possible to make  
5 a decision on a study's inclusion or exclusion based on the abstract, the full text of the study will be  
6 examined.  
7  
8  
9

10 We have carried out a preliminary literature search on the topic of interest in order to preliminarily  
11 clarify inclusion/exclusion criteria. After familiarizing with the literature, we could further  
12 implement/expand and/or modify/refine the targeted search strategy, with the help of an expert research  
13 librarian  
14  
15  
16  
17

### 18 **Study selection**

19  
20 The studies will be independently screened by two authors (NLB and GD), looking at study titles and  
21 abstracts for potential eligibility. Screening questions will be developed and pilot tested with a subset  
22 of records before implementation. The inter-rater agreement will be assessed using  $\kappa$  statistics and will  
23 be resolved through discussion; a third reviewer (PD), acting as a final referee, will be involved if  
24 necessary.  
25  
26  
27  
28  
29

30 Studies meeting the following PECO criteria will be considered for inclusion:<sup>50</sup>

- 31 • P (patient, problem or population): HCWs;
- 32 • E (exposure): injuries;
- 33 • C (comparison, control or comparator): different types of HCWs;
- 34 • O (outcome/outcomes of interest): prevalence/incidence and determinants of injuries.
- 35  
36  
37  
38  
39

40 Furthermore, the following criteria will be taken into consideration:

- 41 • Study design/characteristics: original articles, prevalence/incidence studies, case series;
- 42 • Languages: no language filter/restraint (that is to say, all the full complement of Western  
43 languages available). Included non-English articles will be acquired in full-text and translated  
44 by expert translators with expertise in the field of medicine and related health-allied disciplines.
- 45  
46  
47  
48  
49

### 50 **Charting the data**

51  
52 Data presented in Table 2 will be abstracted from included studies. The data abstraction process will be  
53 performed independently by two authors (NLB and GD) and will be pilot-tested on a small sample of  
54 studies, until consensus is reached.  
55  
56  
57  
58  
59

## Collating, summarizing and reporting the results

Besides the narrative review, we will provide a table with characteristics of included studies and another table of excluded studies with reasons for their exclusion, in our published final scoping review.

## Patient and public involvement

There will be no specific patient and public involvement in the development of this scoping review.

## DISCUSSION

### Implications

The proposed scoping review is expected to contribute to the existing scholarly literature with the potential to influence and inform health practice, education, policy, and future research in the field.

Currently, there is not a comprehensive and broad review of studies performed in Western Countries concerning injuries among HCWs. Stratifying according to the work tasks and type of injuries could add meaningful information.

Briefly, this scoping review will provide the first rigorous analytical, updated synthesis of primary research data concerning the epidemiology of injuries among HCWs in Western countries. This will be useful for health decision- and policy-makers in order to develop, design and implement *ad hoc* adequate policies for primary prevention.

However, we have to anticipate also some shortcomings. The major limitation concerns time filter, which, on the other hand, enables a direct comparison of the findings with the epidemiological figures available at national and local INAIL centers. Moreover, as the process of scoping reviews does not include a formal critical quality assessment and appraisal of included studies, reported findings may lack confidence and validity.

### Ethics

No ethical clearance is required for the present scoping review protocol and for its subsequent implementation steps, in that it will undertake a knowledge synthesis and an analysis of data that have been already collected and published.

## Dissemination

The findings of the scoping review will be submitted to peer-reviewed journals for potential publication(s) and will be the object of *ad hoc* oral/poster communications in relevant national/international scientific congresses, and conferences.

Often, knowledge synthesis studies develop and provide recommendations based on the results obtained. We will not be able to provide any recommendations, since the selected studies will not be critically and formally appraised for methodological quality. However, we will be able to develop recommendations for future research on injuries among HCWs, their burden and their prevention. The findings of this scoping review could be used to guide the education of HCWs (for example, to inform the development and implementation of courses for continuous medical learning). and the health policy- and decision-making process.

## References

- 1) World Health Organization. Working Together for Health: World Health Report 2006. Geneva: Switzerland, 2006.
- 2) Joseph B, Joseph M. The health of the healthcare workers. *Indian J Occup Environ Med* 2016;20(2):71–72.
- 3) Adams BO, Dal Poz MR, Shengelia B, *et al.* Human, Physical, and Intellectual Resource Generation: Proposals for Monitoring. In Murray, C.J.L and Evans, D. (eds) Health Systems Performance Assessment: Debates, Methods and Empiricism. Geneva: World Health Organization: 273-287, 2003.
- 4) Diallo K, Zurn P, Gupta N, *et al.* Monitoring and evaluation of human resources for health: an international perspective. *Hum Resour Health* 2003;1(1):3.
- 5) Dressner MA. Hospital workers: an assessment of occupational injuries and illnesses. Monthly Labor Review, U.S. Bureau of Labor Statistics, June 2017.
- 6) Miller K. Risk factors and impacts of occupational injury in healthcare workers: A critical review. *OA Musculoskeletal Medicine* 2013 Mar 01;1(1):4.
- 7) Young TN, Arens FJ, Kennedy GE, *et al.* Antiretroviral post-exposure prophylaxis (PEP) for occupational HIV exposure. *Cochrane Database Syst Rev* 2007;(1):CD002835.
- 8) Rischitelli G, Harris J, McCauley L, *et al.* The risk of acquiring hepatitis B or C among public safety workers: a systematic review. *Am J Prev Med.* 2001 May;20(4):299-306.
- 9) Westermann C, Peters C, Lisiak B, *et al.* The prevalence of hepatitis C among healthcare workers: a systematic review and meta-analysis. *Occup Environ Med.* 2015 Dec;72(12):880-8.
- 10) Dini G, Toletone A, Sticchi L, *et al.* Influenza vaccination in healthcare workers: A comprehensive critical appraisal of the literature. *Hum Vaccin Immunother.* 2017 Aug 8:1-18.
- 11) Uden L, Barber E, Ford N, *et al.* Risk of Tuberculosis Infection and Disease for Health Care Workers: An Updated Meta-Analysis. *Open Forum Infect Dis.* 2017 Aug 29;4(3):ofx137.
- 12) Placidi D, Tonozzi B, Alessio L, Porru S. Tuberculin skin test (TST) survey among healthcare workers (HCWs) in hospital: a systematic review of the literature. *G Ital Med Lav Ergon.* 2007 Jul-Sep;29(3 Suppl):409-11.
- 13) Riccò M, Vezzosi L, Odone A, *et al.* Invasive Meningococcal Disease on the Workplaces: a systematic review. *Acta Biomed.* 2017 Oct 23;88(3):337-351.

- 14) van den Hoogen A, Duijn JM, Bode LGM, *et al.* Systematic review found that there was moderate evidence that vaccinating healthcare workers prevented pertussis in infants. *Acta Paediatr.* 2017, in press.
- 15) Leone Roberti Maggiore U, Scala C, *et al.* Susceptibility to vaccine-preventable diseases and vaccination adherence among healthcare workers in Italy: A cross-sectional survey at a regional acute-care university hospital and a systematic review. *Hum Vaccin Immunother.* 2017 Feb;13(2):470-476.
- 16) Cooke CE, Stephens JM. Clinical, economic, and humanistic burden of needlestick injuries in healthcare workers. *Med Devices (Auckl)* 2017;10:225-235.
- 17) Prüss-Ustün A, Rapiti E, Hutin Y. Estimation of the global burden of disease attributable to contaminated sharps injuries among health-care workers. *Am J Ind Med* 2005;48(6):482.
- 18) Elseviers MM, Arias-Guillén M, Gorke A, *et al.* Sharps injuries amongst healthcare workers: review of incidence, transmissions and costs. *J Ren Care* 2014 Sep;40(3):150-6.
- 19) Deuffic-Burban S, Delarocque-Astagneau E, Abiteboul D, *et al.* Blood-borne viruses in health care workers: prevention and management. *J Clin Virol* 2011;52(1):4-10.
- 20) Edlich RF, Hudson MA, Buschbacher RM, *et al.* Devastating injuries in healthcare workers: description of the crisis and legislative solution to the epidemic of back injury from patient lifting. *J Long Term Eff Med Implants* 2005;15(2):225-41.
- 21) Nelson AL, Collin J, Knibbe H, *et al.* Safer patient handling. *Nurs Manage* 2007;38(3):26–32.
- 22) Delloiacono N. Musculoskeletal safety for older adults in the workplace: review of current best practice evidence. *Workplace Health Saf* 2015;63(2):48-53.
- 23) Milhem M, Kalichman L, Ezra D, *et al.* Work-related musculoskeletal disorders among physical therapists: A comprehensive narrative review. *Int J Occup Med Environ Health.* 2016;29(5):735-47.
- 24) Dillon BL. Workplace violence: impact, causes, and prevention. *Work* 2012;42(1):15-20.
- 25) International Labour Office (ILO), International Council of Nurses (ICN), World Health Organization (WHO), Public Services International (PSI). Joint Programme on Workplace Violence in the Health Sector. Geneva, 2002.
- 26) Spaducci G, Stubbs B, McNeill A, Stewart D, Robson D. Violence in mental health settings: A systematic review. *Int J Ment Health Nurs.* 2018 Feb;27(1):33-45.
- 27) d'Ettorre G, Pellicani V. Workplace Violence Toward Mental Healthcare Workers Employed in Psychiatric Wards. *Saf Health Work* 2017;8(4):337-342.

- 1  
2  
3 28) Luftman K, Aydelotte J, Rix K, et al. PTSD in those who care for the injured. *Injury*. 2017  
4 Feb;48(2):293-296.  
5  
6 29) Ashton RA, Morris L, Smith I. A qualitative meta-synthesis of emergency department staff  
7 experiences of violence and aggression. *Int Emerg Nurs*. 2018, in press.  
8  
9 30) Gillespie GL, Gates DM, Miller M, et al. Workplace violence in healthcare settings: risk factors  
10 and protective strategies. *Rehabil Nurs* 2010;35(5):177-84.  
11  
12 31) Sossai D, Molina FS, Amore M, et al. Analysis of incidents of violence in a large Italian  
13 hospital. *Med Lav*. 2017 Oct 27;108(5):6005.  
14  
15 32) Molina Aragonés JM, Ayora Ayora A, Barbara Ribalta A, et al. Occupational exposure to  
16 volatile anaesthetics: a systematic review. *Occup Med (Lond)*. 2016 Apr;66(3):202-7.  
17  
18 33) Caciari T, Capozzella A, Tomei F, et al. Professional exposure to ionizing radiations in health  
19 workers and white blood cells. *Ann Ig*. 2012 Nov-Dec;24(6):465-74.  
20  
21 34) Garbarino S, Traversa F, Spigno F, et al. Sleepiness, sleep disorders and risk of occupational  
22 accidents. *G Ital Med Lav Ergon*. 2011 Jul-Sep;33(3 Suppl):207-11.  
23  
24 35) Garbarino S, Repice AM, Traversa F, et al. Commuting accidents: the influence of excessive  
25 daytime sleepiness. A review of an Italian Police officers population. *G Ital Med Lav Ergon*  
26 2007;29(3 Suppl):324-6.  
27  
28 36) Caruso CC. Negative impacts of shiftwork and long work hours. *Rehabil Nurs*. 2014 Jan-  
29 Feb;39(1):16-25.  
30  
31 37) Booker LA, Magee M, Rajaratnam SMW, et al. Individual vulnerability to insomnia, excessive  
32 sleepiness and shift work disorder amongst healthcare shift workers. A systematic review. *Sleep*  
33 *Med Rev*. 2018  
34  
35 38) Copello F, Garbarino S, Messineo A, et al. Occupational Medicine and Hygiene: applied  
36 research in Italy. *J Prev Med Hyg* 2015;56(2):E102-10.  
37  
38 39) Khalil H, Peters M, Godfrey CM, et al. An Evidence-Based Approach to Scoping Reviews.  
39 *Worldviews Evid Based Nurs* 2016;13(2):118-23.  
40  
41 40) Arksey H, O'Malley L. Scoping studies: Towards a Methodological Framework. *Int J Soc Res*  
42 *Methodol* 2005;8:19-32.  
43  
44 41) Levac D, Colquhoun H, O'Brien KK. Scoping studies: advancing the methodology. *Implement*  
45 *Sci* 2010;5:69.  
46  
47 42) Colquhoun HL, Levac D, O'Brien KK, et al. Scoping reviews: time for clarity in definition,  
48 methods, and reporting. *J Clin Epidemiol*. 2014 Dec;67(12):1291-4.  
49  
50  
51  
52  
53  
54  
55  
56  
57  
58  
59

- 1  
2  
3 43) Tricco AC, Lillie E, Zarin W, *et al.* A scoping review on the conduct and reporting of scoping  
4 reviews. *BMC Med Res Methodol* 2016;16:15.  
5  
6 44) Peters MD, Godfrey CM, Khalil H, *et al.* Guidance for conducting systematic scoping reviews.  
7 *Int J Evid Based Healthc* 2015;13(3):141-146.  
8  
9 45) Grant MJ, Booth A. A typology of reviews: an analysis of 14 review types and associated  
10 methodologies. *Health Info Libr J* 2009;26(2):91-108.  
11  
12 46) Mays N, Roberts E, Popay J. Synthesising research evidence. In N. Fulop, P. Allen, A. Clarke,  
13 & N. Black (Eds.), *Studying the organisation and delivery of health services: Research methods*  
14 (pp. 188-219). London: Routledge, 2001.  
15  
16 47) Peterson J, Pearce PF, Ferguson LA, *et al.* Understanding scoping reviews: Definition, purpose,  
17 and process. *J Am Assoc Nurse Pract* 2017;29(1):12-16.  
18  
19 48) Shamseer L, Moher D, Clarke M, *et al.* Preferred reporting items for systematic review and  
20 meta-analysis protocols (PRISMA-P) 2015: elaboration and explanation. *BMJ* 2015;349(jan02  
21 1):g7647.  
22  
23 49) Chien PF, Khan KS, Siassakos D. Registration of systematic reviews: PROSPERO. *BJOG*  
24 2012;119(8):903-5.  
25  
26 50) Moher D, Liberati A, Tetzlaff J, *et al.* Preferred reporting items for systematic reviews and  
27 meta-analyses: the PRISMA Statement. *Open Med* 2009;3(3):e123-30.  
28  
29  
30  
31  
32  
33  
34  
35  
36  
37  
38  
39  
40  
41  
42  
43  
44  
45  
46  
47  
48  
49  
50  
51  
52  
53  
54  
55  
56  
57  
58  
59  
60



1  
2  
3 **Tables.**  
4

5 **Table 1. Planned search strategy.**  
6

| SEARCH STRATEGY ITEM | SEARCH STRATEGY                                                                                                                                                                                                                                                                                                                                                                                                                                                                                                                                                                                                                                                                                                                                                                                                                                                                                                                                                                                                                                                                                                                                                                                                                                                                                                                                                                                                                                                                                                                                                                                                                                                                                                                                                                                                                     |
|----------------------|-------------------------------------------------------------------------------------------------------------------------------------------------------------------------------------------------------------------------------------------------------------------------------------------------------------------------------------------------------------------------------------------------------------------------------------------------------------------------------------------------------------------------------------------------------------------------------------------------------------------------------------------------------------------------------------------------------------------------------------------------------------------------------------------------------------------------------------------------------------------------------------------------------------------------------------------------------------------------------------------------------------------------------------------------------------------------------------------------------------------------------------------------------------------------------------------------------------------------------------------------------------------------------------------------------------------------------------------------------------------------------------------------------------------------------------------------------------------------------------------------------------------------------------------------------------------------------------------------------------------------------------------------------------------------------------------------------------------------------------------------------------------------------------------------------------------------------------|
| Databases            | PubMed/MEDLINE (NLM), Scopus, SciVerse ScienceDirect, Science Citation Index Expanded and Social Sciences Citation Index from ISI/Web of Science, ProQuest Research Library, ABI/INFORM, CBCA, <i>via</i> the UNO per TUTTI Primo Central (Ex Libris) platform                                                                                                                                                                                                                                                                                                                                                                                                                                                                                                                                                                                                                                                                                                                                                                                                                                                                                                                                                                                                                                                                                                                                                                                                                                                                                                                                                                                                                                                                                                                                                                      |
| Language filter      | None                                                                                                                                                                                                                                                                                                                                                                                                                                                                                                                                                                                                                                                                                                                                                                                                                                                                                                                                                                                                                                                                                                                                                                                                                                                                                                                                                                                                                                                                                                                                                                                                                                                                                                                                                                                                                                |
| Time filter          | 2000-2018                                                                                                                                                                                                                                                                                                                                                                                                                                                                                                                                                                                                                                                                                                                                                                                                                                                                                                                                                                                                                                                                                                                                                                                                                                                                                                                                                                                                                                                                                                                                                                                                                                                                                                                                                                                                                           |
| Spatial filter       | Western countries                                                                                                                                                                                                                                                                                                                                                                                                                                                                                                                                                                                                                                                                                                                                                                                                                                                                                                                                                                                                                                                                                                                                                                                                                                                                                                                                                                                                                                                                                                                                                                                                                                                                                                                                                                                                                   |
| Keywords             | <p>1. "healthcare worker" OR "healthcare workers" OR "healthcare personnel" OR "healthcare staff" OR "health worker" OR "health workers" OR "health personnel" OR "health staff" OR physicians OR physician OR doctors OR doctor OR nurses OR nurse OR practitioners OR practitioner OR "medical students" OR "medical residents" OR "attending residents" OR "hospital technician" OR "hospital technicians" OR "paramedical personnel" OR "paramedical staff" OR "hospital support personnel"</p> <p>2. injury OR injuries OR incident OR incidents OR "occupational injury" OR "occupational injuries" OR "occupational incident" OR "occupational incidents" OR "work related injury" OR "work related injuries" OR "work related incident" OR "work related incidents" OR "workplace-induced injury" OR "workplace-induced injuries" OR "workplace-induced incident" OR "workplace-induced incidents" OR "occupational health hazard" OR "occupational health hazards"</p> <p>3. "exposure incidents" OR "splash exposures" OR "splash exposure" OR needle-sticks OR "sharp objects" OR sharps OR "percutaneous injuries" OR "percutaneous injury"</p> <p>4. "manual handling injury" OR "manual handling injuries" OR "musculoskeletal injury" OR "musculoskeletal injuries"</p> <p>5. "chemical occupational exposure" OR "exposure to inhaled anesthetic" OR "reagent exposure" OR "exposure to reagent" OR "exposure to solvents" OR "solvent exposure" OR "exposure to detergents" OR "detergent exposure"</p> <p>6. "slips, trips and falls" OR "slipping, tripping and falling accidents" OR "accidental fall" OR "same-level fall" OR "same-surface fall" OR stump-and-fall OR step-and-fall OR "forced-rotation-type fall" OR "fall from elevation"</p> <p>7. "violent events" OR violence OR assault OR assaults</p> |



---

|    |                                                                          |
|----|--------------------------------------------------------------------------|
| 1  |                                                                          |
| 2  |                                                                          |
| 3  |                                                                          |
| 4  | 8. "cuts and wounds" OR "burns"                                          |
| 5  |                                                                          |
| 6  |                                                                          |
| 7  | 9. "motor vehicle accidents" OR "motor vehicle accident" OR "motor       |
| 8  | vehicle collisions" OR "motor vehicle collision" OR "motor vehicle       |
| 9  | crash" OR "motor vehicle crashes" OR "motor vehicle near crash" OR       |
| 10 | "motor vehicle near crashes"                                             |
| 11 |                                                                          |
| 12 | 10. "exposure to ionizing radiation" OR "radiation exposure"             |
| 13 |                                                                          |
| 14 |                                                                          |
| 15 | 1. AND 2. OR 3. OR 4. OR 5. OR 6. OR 7. OR 8. OR 9. OR 10.               |
| 16 |                                                                          |
| 17 | Inclusion criteria                                                       |
| 18 | P: medical/paramedical students and residents, doctors and nurses,       |
| 19 | cleaners and porters                                                     |
| 20 | E: exposure to biological, chemical, physical/ergonomic risk and         |
| 21 | hazard                                                                   |
| 22 | C: medical versus nursing or dental students; students versus residents; |
| 23 | medical versus nursing or dental trainees/residents; before and after a  |
| 24 | preventive program                                                       |
| 25 | O: prevalence/incidence of injuries and their determinants among         |
| 26 | healthcare workers in Western countries, related disabilities and        |
| 27 | absence from work, and generated economic burden (direct/indirect        |
| 28 | costs)                                                                   |
| 29 | S: primary research                                                      |
| 30 | Exclusion criteria                                                       |
| 31 | Editorial, letter to the editor, commentary, review                      |
| 32 | Target journals                                                          |
| 33 | Occupational and public health journals                                  |

---

**Table 2. Data planned to be extracted and details/explanations.**

| EXTRACTED DATA                               | DETAILS                                                                                                                                                                                                       |
|----------------------------------------------|---------------------------------------------------------------------------------------------------------------------------------------------------------------------------------------------------------------|
| Study Reference                              | Names and surnames of authors, year of publication                                                                                                                                                            |
| Study population                             | Physicians, doctors, nurses, medical students, residents, cleaners, porters                                                                                                                                   |
| Country                                      | Country or countries in which the study or studies was or were carried out                                                                                                                                    |
| Study design                                 | Type of recruitment                                                                                                                                                                                           |
| M%                                           | Percentage of male healthcare workers                                                                                                                                                                         |
| Age                                          | Mean age of healthcare workers sample                                                                                                                                                                         |
| Sample number, attrition rate                | Number of healthcare workers who took part into the survey, number of non responders                                                                                                                          |
| Professional/experience years                | Years spent in profession by healthcare workers included in the study                                                                                                                                         |
| Working setting                              | Hospital ward where the injury occurred (for example, emergency room, obstetrics department, surgery department, operating room, outpatient clinic, department of Internal Medicine, patients' room, CCU/ICU) |
| Injury prevalence/incidence rate             | Prevalence/incidence rates stratified according to the kind of injury                                                                                                                                         |
| Method                                       | Questionnaire (validated, not validated)                                                                                                                                                                      |
| Following standard procedures                | Prevalence/incidence rates stratified according to the compliance to procedures and guidelines among the different types of healthcare workers                                                                |
| Knowledge, attitudes and practices about PEP | Prevalence/incidence rates stratified according to the knowledge, attitudes and practices concerning PEP, among the different types of healthcare workers                                                     |
| Clerkship abroad                             | Periods of training abroad; type of task(s) the healthcare worker was involved in during the                                                                                                                  |

---

|                                                        |                                                                                                                                                               |
|--------------------------------------------------------|---------------------------------------------------------------------------------------------------------------------------------------------------------------|
|                                                        | training period abroad                                                                                                                                        |
| Reporting/non-reporting to Occupational<br>Departement | Prevalence/incidence rates stratified according<br>to the determinants of the reporting/non-<br>reporting, among the different types of<br>healthcare workers |
| Injuries-related burden                                | Number of days of absence from work,<br>disabilities and economic direct/indirect costs<br>due to injuries                                                    |

---

1  
2  
3  
4  
5  
6  
7  
8  
9  
10  
11  
12  
13  
14  
15  
16  
17  
18  
19  
20  
21  
22  
23  
24  
25  
26  
27  
28  
29  
30  
31  
32  
33  
34  
35  
36  
37  
38  
39  
40  
41  
42  
43  
44  
45  
46  
47  
48  
49  
50  
51  
52  
53  
54  
55  
56  
57  
58  
59  
60

Figures.

Figure 1. Flowchart of selection of studies according to the “Preferred Reporting Items for Systematic Reviews and Meta-analyses” (PRISMA) guidelines.

For peer review only

### Contributors

NLB, GD, VP, CB, RL, VM, AT, FB, BDA, EM, AM, ND, and PD conceived the idea. NLB, GD, VM, AT, and PD developed the research questions. NLB, GD, and PD developed the study methods. VP, CB, RL, FB, BDA, EM, AM, and ND aided in developing the research question and study methods. All authors participated in drafting the article, editing or revising it critically for important intellectual content; all authors gave final approval of the version to be submitted and any revised version.

### Funding

This research was co-funded by the "Istituto Nazionale per l'Assicurazione contro gli Infortuni sul Lavoro (INAIL, National Institute for Insurance Against Accidents at Work)" and the Department of Health Sciences, Occupational Medicine - University of Genoa, Italy.

### Competing interests

None declared.

### Patient consent

Not required.

1  
2  
3  
4  
5  
6  
7  
8  
9  
10  
11  
12  
13  
14  
15  
16  
17  
18  
19  
20  
21  
22  
23  
24  
25  
26  
27  
28  
29  
30  
31  
32  
33  
34  
35  
36  
37  
38  
39  
40  
41  
42  
43  
44  
45  
46  
47  
48  
49  
50  
51  
52  
53  
54  
55  
56  
57  
58  
59  
60



**PRISMA 2009 Flow Diagram**



Flowchart of selection of studies according to the "Preferred Reporting Items for Systematic Reviews and Meta-analyses" (PRISMA) guidelines.

226x236mm (300 x 300 DPI)

**PRISMA-P (Preferred Reporting Items for Systematic review and Meta-Analysis Protocols) 2015 checklist: recommended items to address in a systematic review protocol\***

| Section and topic                 | Item No | Checklist item                                                                                                                                                                                  | Page of the documents and details                                                                                                                                                                                                                           |
|-----------------------------------|---------|-------------------------------------------------------------------------------------------------------------------------------------------------------------------------------------------------|-------------------------------------------------------------------------------------------------------------------------------------------------------------------------------------------------------------------------------------------------------------|
| <b>ADMINISTRATIVE INFORMATION</b> |         |                                                                                                                                                                                                 |                                                                                                                                                                                                                                                             |
| Title:                            |         |                                                                                                                                                                                                 |                                                                                                                                                                                                                                                             |
| Identification                    | 1a      | Identify the report as a protocol of a systematic review                                                                                                                                        | Protocol of a scoping review assessing injury rate and determinants among healthcare workers in Western countries (page 1)                                                                                                                                  |
| Update                            | 1b      | If the protocol is for an update of a previous systematic review, identify as such                                                                                                              |                                                                                                                                                                                                                                                             |
| Registration                      | 2       | If registered, provide the name of the registry (such as PROSPERO) and registration number                                                                                                      | In accordance with these guidelines, the scoping review protocol has been submitted to the International Prospective Register of Systematic Reviews (PROSPERO). However, currently, PROSPERO does not accept to register scoping review protocols (page 8). |
| Authors:                          |         |                                                                                                                                                                                                 |                                                                                                                                                                                                                                                             |
| Contact                           | 3a      | Provide name, institutional affiliation, e-mail address of all protocol authors; provide physical mailing address of corresponding author                                                       | Page 1 and page 21. Furthermore, role of each author is outlined in the protocol.                                                                                                                                                                           |
| Contributions                     | 3b      | Describe contributions of protocol authors and identify the guarantor of the review                                                                                                             |                                                                                                                                                                                                                                                             |
| Amendments                        | 4       | If the protocol represents an amendment of a previously completed or published protocol, identify as such and list changes; otherwise, state plan for documenting important protocol amendments | The present protocol is not an amendment.                                                                                                                                                                                                                   |
| Support:                          |         |                                                                                                                                                                                                 |                                                                                                                                                                                                                                                             |
| Sources                           | 5a      | Indicate sources of financial or other support for the review                                                                                                                                   | Sources and the role of the sponsor are indicated at page 7 and at page 21.                                                                                                                                                                                 |
| Sponsor                           | 5b      | Provide name for the review funder and/or sponsor                                                                                                                                               |                                                                                                                                                                                                                                                             |
| Role of sponsor or funder         | 5c      | Describe roles of funder(s), sponsor(s), and/or institution(s), if any, in developing the protocol                                                                                              |                                                                                                                                                                                                                                                             |
| <b>INTRODUCTION</b>               |         |                                                                                                                                                                                                 |                                                                                                                                                                                                                                                             |
| Rationale                         | 6       | Describe the rationale for the review in the context of what is already known                                                                                                                   | Rationale is provided in the background (pages 4-6).                                                                                                                                                                                                        |
| Objectives                        | 7       | Provide an explicit statement of the question(s) the review will                                                                                                                                | Page 7.                                                                                                                                                                                                                                                     |

address with reference to participants, interventions, comparators, and outcomes (PICO)

**METHODS**

|                                   |     |                                                                                                                                                                                                                               |                     |
|-----------------------------------|-----|-------------------------------------------------------------------------------------------------------------------------------------------------------------------------------------------------------------------------------|---------------------|
| Eligibility criteria              | 8   | Specify the study characteristics (such as PICO, study design, setting, time frame) and report characteristics (such as years considered, language, publication status) to be used as criteria for eligibility for the review | Page 8 and table 1. |
| Information sources               | 9   | Describe all intended information sources (such as electronic databases, contact with study authors, trial registers or other grey literature sources) with planned dates of coverage                                         | Page 8 and table 1. |
| Search strategy                   | 10  | Present draft of search strategy to be used for at least one electronic database, including planned limits, such that it could be repeated                                                                                    | Page 8 and table 1. |
| Study records:<br>Data management | 11a | Describe the mechanism(s) that will be used to manage records and data throughout the review                                                                                                                                  | Pages 8-9.          |

Peer review only



|                                    |     |                                                                                                                                                                                                                                                  |       |
|------------------------------------|-----|--------------------------------------------------------------------------------------------------------------------------------------------------------------------------------------------------------------------------------------------------|-------|
|                                    |     |                                                                                                                                                                                                                                                  | Pages |
| Selection process                  | 11b | State the process that will be used for selecting studies (such as two independent reviewers) through each phase of the review (that is, screening, eligibility and inclusion in meta-analysis)                                                  | 8-9   |
|                                    |     |                                                                                                                                                                                                                                                  | Pages |
| Data collection process            | 11c | Describe planned method of extracting data from reports (such as piloting forms, done independently, in duplicate), any processes for obtaining and confirming data from investigators                                                           | 8-9   |
|                                    |     |                                                                                                                                                                                                                                                  | Table |
| Data items                         | 12  | List and define all variables for which data will be sought (such as PICO items, funding sources), any pre-planned data assumptions and simplifications                                                                                          | 2.    |
|                                    |     |                                                                                                                                                                                                                                                  | Table |
| Outcomes and prioritization        | 13  | List and define all outcomes for which data will be sought, including prioritization of main and additional outcomes, with Rationale                                                                                                             | 2.    |
|                                    |     |                                                                                                                                                                                                                                                  | Pages |
| Risk of bias in individual studies | 14  | Describe anticipated methods for assessing risk of bias of individual studies, including whether this will be done at the outcome or study level, or both; state how this information will be used in data synthesis                             | 8-10  |
|                                    |     |                                                                                                                                                                                                                                                  | Pages |
| Data synthesis                     | 15a | Describe criteria under which study data will be quantitatively synthesised                                                                                                                                                                      | 8-10  |
|                                    | 15b | If data are appropriate for quantitative synthesis, describe planned summary measures, methods of handling data and methods of combining data from studies, including any planned exploration of consistency (such as $I^2$ , Kendall's $\tau$ ) |       |
|                                    | 15c | Describe any proposed additional analyses (such as sensitivity or subgroup analyses, meta-regression)                                                                                                                                            |       |
|                                    | 15d | If quantitative synthesis is not appropriate, describe the type of summary planned                                                                                                                                                               |       |
|                                    |     |                                                                                                                                                                                                                                                  | Pages |
| Meta-bias(es)                      | 16  | Specify any planned assessment of meta-bias(es) (such as publication bias across studies, selective reporting within studies)                                                                                                                    | 8-10  |
|                                    |     |                                                                                                                                                                                                                                                  | Page  |
| Confidence in cumulative evidence  | 17  | Describe how the strength of the body of evidence will be assessed (such as GRADE)                                                                                                                                                               | 10    |

**\* It is strongly recommended that this checklist be read in conjunction with the PRISMA-P Explanation and Elaboration (cite when available) for important clarification on the items. Amendments to a review protocol should be tracked and dated. The copyright for PRISMA-P (including checklist) is held by the PRISMA-P Group and is distributed under a Creative Commons Attribution Licence 4.0.**

*From: Shamseer L, Moher D, Clarke M, Ghersi D, Liberati A, Petticrew M, Shekelle P, Stewart L, PRISMA-P Group. Preferred reporting items for systematic review and meta-analysis protocols (PRISMA-P) 2015: elaboration and explanation. BMJ. 2015 Jan 2;349(jan02 1):g7647.*

# BMJ Open

## Protocol of a scoping review assessing injury rate and its determinants among healthcare workers in Western countries

|                                 |                                                                                                                                                                                                                                                                                                                                                                                                                                                                                                                                                                                                                                                                                                                                                                                                                                                                                                                                                                                                                                                                                                                                                                                                                                                                                                                                                                                                                                                                                                                                                                                                                                                                                                                                                                                                                                                                                                                                                                                                                                    |
|---------------------------------|------------------------------------------------------------------------------------------------------------------------------------------------------------------------------------------------------------------------------------------------------------------------------------------------------------------------------------------------------------------------------------------------------------------------------------------------------------------------------------------------------------------------------------------------------------------------------------------------------------------------------------------------------------------------------------------------------------------------------------------------------------------------------------------------------------------------------------------------------------------------------------------------------------------------------------------------------------------------------------------------------------------------------------------------------------------------------------------------------------------------------------------------------------------------------------------------------------------------------------------------------------------------------------------------------------------------------------------------------------------------------------------------------------------------------------------------------------------------------------------------------------------------------------------------------------------------------------------------------------------------------------------------------------------------------------------------------------------------------------------------------------------------------------------------------------------------------------------------------------------------------------------------------------------------------------------------------------------------------------------------------------------------------------|
| Journal:                        | <i>BMJ Open</i>                                                                                                                                                                                                                                                                                                                                                                                                                                                                                                                                                                                                                                                                                                                                                                                                                                                                                                                                                                                                                                                                                                                                                                                                                                                                                                                                                                                                                                                                                                                                                                                                                                                                                                                                                                                                                                                                                                                                                                                                                    |
| Manuscript ID                   | bmjopen-2018-023372.R3                                                                                                                                                                                                                                                                                                                                                                                                                                                                                                                                                                                                                                                                                                                                                                                                                                                                                                                                                                                                                                                                                                                                                                                                                                                                                                                                                                                                                                                                                                                                                                                                                                                                                                                                                                                                                                                                                                                                                                                                             |
| Article Type:                   | Protocol                                                                                                                                                                                                                                                                                                                                                                                                                                                                                                                                                                                                                                                                                                                                                                                                                                                                                                                                                                                                                                                                                                                                                                                                                                                                                                                                                                                                                                                                                                                                                                                                                                                                                                                                                                                                                                                                                                                                                                                                                           |
| Date Submitted by the Author:   | 08-Nov-2018                                                                                                                                                                                                                                                                                                                                                                                                                                                                                                                                                                                                                                                                                                                                                                                                                                                                                                                                                                                                                                                                                                                                                                                                                                                                                                                                                                                                                                                                                                                                                                                                                                                                                                                                                                                                                                                                                                                                                                                                                        |
| Complete List of Authors:       | <p>Bragazzi, Nicola; Department of Health Sciences (DISSAL), Postgraduate School of Occupational Medicine, University of Genoa<br/> Dini, Guglielmo; Department of Health Sciences (DISSAL), Postgraduate School of Occupational Medicine, University of Genoa; Occupational Medicine Unit, Policlinico San Martino Hospital<br/> Parodi, Valentina; Department of Health Sciences (DISSAL), Postgraduate School of Occupational Medicine, University of Genoa<br/> Blasi, Carlo; Liguria Regional Directorate, National Institution for Insurance Against Accidents at Work (INAIL)<br/> Linares, Roberta; Liguria Regional Directorate, National Institution for Insurance Against Accidents at Work (INAIL)<br/> Mortara, Virginia; Liguria Regional Directorate, National Institution for Insurance Against Accidents at Work (INAIL)<br/> Toletone, Alessandra; Department of Health Sciences (DISSAL), Postgraduate School of Occupational Medicine, University of Genoa; Occupational Medical Service, Local Health Unit 1, Liguria Regional Healthcare System<br/> Bersi, Francesca; Department of Health Sciences (DISSAL), Postgraduate School of Occupational Medicine, University of Genoa<br/> D'Amico, Beatrice; Department of Health Sciences (DISSAL), Postgraduate School of Occupational Medicine, University of Genoa; Occupational Medicine Unit, Policlinico San Martino Hospital<br/> Massa, Emanuela; Department of Health Sciences (DISSAL), Postgraduate School of Occupational Medicine, University of Genoa<br/> Montecucco, Alfredo; Department of Health Sciences (DISSAL), Postgraduate School of Occupational Medicine, University of Genoa; Occupational Medicine Unit, Policlinico San Martino Hospital<br/> Debarbieri, Nicoletta; Occupational Medicine Unit, Policlinico San Martino Hospital<br/> Durando, Paolo; Department of Health Sciences (DISSAL), Postgraduate School of Occupational Medicine, University of Genoa; Occupational Medicine Unit, Policlinico San Martino Hospital</p> |
| <b>Primary Subject Heading</b>: | Occupational and environmental medicine                                                                                                                                                                                                                                                                                                                                                                                                                                                                                                                                                                                                                                                                                                                                                                                                                                                                                                                                                                                                                                                                                                                                                                                                                                                                                                                                                                                                                                                                                                                                                                                                                                                                                                                                                                                                                                                                                                                                                                                            |
| Secondary Subject Heading:      | Epidemiology                                                                                                                                                                                                                                                                                                                                                                                                                                                                                                                                                                                                                                                                                                                                                                                                                                                                                                                                                                                                                                                                                                                                                                                                                                                                                                                                                                                                                                                                                                                                                                                                                                                                                                                                                                                                                                                                                                                                                                                                                       |
| Keywords:                       | healthcare workers, injuries, scoping review protocol                                                                                                                                                                                                                                                                                                                                                                                                                                                                                                                                                                                                                                                                                                                                                                                                                                                                                                                                                                                                                                                                                                                                                                                                                                                                                                                                                                                                                                                                                                                                                                                                                                                                                                                                                                                                                                                                                                                                                                              |

1  
2  
3  
4  
5  
6  
7  
8  
9  
10  
11  
12  
13  
14  
15  
16  
17  
18  
19  
20  
21  
22  
23  
24  
25  
26  
27  
28  
29  
30  
31  
32  
33  
34  
35  
36  
37  
38  
39  
40  
41  
42  
43  
44  
45  
46  
47  
48  
49  
50  
51  
52  
53  
54  
55  
56  
57  
58  
59  
60



SCHOLARONE™  
Manuscripts

Revised. To be submitted to *BMJ Open*

**Protocol of a scoping review assessing injury rate and its determinants among healthcare workers in Western countries**

Nicola Luigi Bragazzi<sup>1\*</sup>, Guglielmo Dini<sup>1,2\*</sup>, Valentina Parodi<sup>1</sup>, Carlo Blasi<sup>3</sup>, Roberta Linares<sup>3</sup>, Virginia Mortara<sup>3</sup>, Alessandra Toletone<sup>1,4</sup>, Francesca Bersi<sup>1</sup>, Beatrice D'Amico<sup>1,2</sup>, Emanuela Massa<sup>1</sup>, Alfredo Montecucco<sup>1,2</sup>, Nicoletta Debarbieri<sup>2</sup>, Paolo Durando<sup>1,2</sup>

<sup>1</sup>Department of Health Sciences (DISSAL), Postgraduate School of Occupational Medicine, University of Genoa, Italy

<sup>2</sup>Occupational Medicine Unit, Policlinico San Martino Hospital, Genoa, Italy

<sup>3</sup>Liguria Regional Directorate, National Institute for Insurance Against Accidents at Work/ Istituto nazionale per l'assicurazione contro gli infortuni sul lavoro (INAIL)

<sup>4</sup>Occupational Medical Service, Local Health Unit 1, Liguria Regional Healthcare System, Imperia, Italy

\* These authors contributed equally to this work.

\*Corresponding Author:

Prof. Dr. Paolo Durando, MD, PhD,

Department of Health Sciences (DISSAL), Postgraduate School of Occupational Medicine, University of Genoa and Occupational Medicine Unit, Policlinic San Martino Hospital, Genoa, Italy

Largo R. Benzi 10 (Building 3), 16132 Genoa, Italy

Phone: 0039 0103538133

Fax: 0039 010505618

E-mail: durando@unige.it

## ABSTRACT

**Introduction:** Healthcare workers (HCWs) are subject to different risk factors and risky behaviors that can have a serious impact on their health and work capability. The aim of this protocol is to detail the steps for carrying out a scoping review assessing the prevalence/incidence of injuries among HCWs.

**Methods and analysis:** The study will be carried out following the “Preferred Reporting Items for Systematic reviews and Meta-Analysis – Protocols” (PRISMA-P) guidelines. Studies will be selected according to the following Population/Exposure/Comparator/Outcomes (PICO) criteria: P (HCWs), I (exposure to injuries), C (different types of exposure and different categories of HCWs) and O (prevalence/incidence and determinants of injuries). Time filter has been set considering literature between 2000 and 2018 to enable an updated, direct comparison of the findings with the epidemiological figures available at national and local "Istituto Nazionale per l'Assicurazione contro gli Infortuni sul Lavoro" (National Institute for Insurance Against Accidents at Work, INAIL) Centers in Italy. No language restriction will be applied.

**Ethics and dissemination:** Formal ethical approval is not required as primary data will not be collected, being already published. The results will be disseminated through peer-reviewed publication(s), conference presentation(s) and the popular press.

**Key terms:** healthcare workers; injuries; scoping review protocol

### Strengths and limitations of this study

- In the existing scholarly literature, there is not a review of studies performed in Western Countries concerning injuries among healthcare workers .
- Stratifying according to the work tasks and type of injuries could add meaningful information.
- A major limitation concerns time filter (studies published between 2000 and 2018), which, on the other hand, enables an updated, direct comparison of the findings with the epidemiological figures available at national and local "Istituto Nazionale per l'Assicurazione contro gli Infortuni sul Lavoro" (National Institute for Insurance Against Accidents at Work, INAIL) Centers.

## BACKGROUND

The healthcare system represents the fastest growing sector in Western economy and employs millions of workers, over 18 million in the United States and more than 59 million worldwide.<sup>1</sup>

Healthcare workers (HCWs) is an umbrella term, which refers to all people engaged in the promotion, protection, care or improvement of the health of the population. This term includes a variety of different figures, ranging from medical doctors (like specialists, pediatricians, and general practitioners) to midwives and nurses, other health allied professionals, central supply workers and technicians, as well as residents.<sup>2-4</sup>

Different variables may act as risk factors and impact on HCWs' health and safety, which could, in turn, lead to occupational injuries and disorders. These include: the individual characteristics of the HCWs (age, gender, education, smoking status, and other lifestyle habits), as well as the features of the patient under care (namely, socio-demographic characteristics of the patient and type of disease) and of the healthcare settings (for example, organization, workload, or night shifts) and procedures (such as invasive treatment).

As with other working settings, hospitals and other healthcare facilities are not completely safe workplace environments for professionals. HCWs can be exposed to several occupational health hazards, resulting in a relevant clinical, economic and humanistic burden. Injury rates among HCWs constitute the highest injury rates, among all type of workers, in Western countries.<sup>5,6</sup> Some classical occupational hazards seem to re-emerge due to societal changes, including biological ones (such as infections, like HBV, HCV, HIV, measles, influenza, varicella, tuberculosis, among others).<sup>7-15</sup> They represent an important occupational health problem, as most of them are blood-borne diseases, which can be acquired through needle-stick or sharp injuries (NSSI). HCWs have contact with infected patients and their body fluids. An important factor is that HCWs are at risk for repeated performance of exposure prone procedures (EPPs) that may cause injuries to employees. These include surgeons, midwives, microbiologists, pathologists, blood bank and dialysis staff. According to a recent review by Cooke and Stephens, in 2015, a needle-stick injury generated a cost of 747 dollars (range 199-1,691 dollars).<sup>16</sup> Prüss-Ustün and collaborators, using mathematical modeling, estimated the global burden of infections due to percutaneous injuries (PIs) among HCWs. More in detail, this was done on the probability of injury, the prevalence of infection, the susceptibility of the worker and the percutaneous transmission potential. In Western countries, 1,510 HCV, 360 HBV and 11 HIV cases occurred in the year 2000, ranging from 8-27%, 1-8% and 0,5-3,1% of infections, respectively.<sup>17</sup> A recently published systematic review and meta-analysis of the literature performed by Auta and coworkers<sup>18</sup> has computed a global one-year prevalence of PIs of 36.4% [95% confidence interval or CI 32.9–40.0], ranging from 9.5% [95%CI 6.7–12.4] in

1  
2  
3 Australasia to 15.7% [95%CI 12.1–19.3] in North America and to 31.8% [95%CI 25.0–38.5] in  
4 Europe. Incidence rates of sharps injuries ranged from 1.4 to 9.5 per 100 HCWs, with a weighted  
5 mean of 3.7/100 HCWs *per* year and a related societal mean cost of €272.<sup>19</sup> According to Deuffic-  
6 Burban and colleagues,<sup>20</sup> the risk of transmission of blood-borne pathogens infections is estimated  
7 to be 30% in susceptible HCWs without post-exposure prophylaxis (PEP) or adequate hepatitis B  
8 vaccination, 0–0.5%, and <0.3%, for HBV, HCV and HIV, respectively. Recently, in the last years,  
9 large measles outbreaks with nosocomial transmission among HCWs have been documented, in  
10 countries like Italy and the UK.<sup>21,22</sup>

11 Adopting preventive measures such as following standard precautions or undertaking training  
12 sessions targeted for both long-term HCWs, students and residents at risk can lead to a reduction in  
13 the incidence of occupational exposure, and, therefore, of PIs. For instance, in France, the  
14 proportion of PIs preventable by taking standard precautions decreased from 52.5% in 2004 to  
15 45.8% in 2008.<sup>20</sup>

16 Other hazards are ergonomic/physical. The category of musculoskeletal injuries represents one of  
17 the highest categories of accidents among HCWs, due to patient handling and overexertion.  
18 Musculoskeletal injuries can involve body structures, such as muscles, nerves, tendons and  
19 ligaments, joints and cartilage, due to factors like repetition, force, awkward postures, contact stress  
20 or vibration. Healthcare personnel members dedicated to patient care, as well as to hospital  
21 housekeeping, laundry, and food service, maintenance, central supply and office, are susceptible to  
22 such injuries. Patient-handling injuries are caused by manually lifting patients, who are generally  
23 more overweight and obese than in the past. As such, a "Safe Patient Handling – No Manual Lift"  
24 policy should be adopted in order to prevent such accidents. This is especially of value, given the  
25 actual shortage of HCWs and, in particular, of nurses, and the importance of early mobilizing  
26 patients and assisting them with physical activities.<sup>23,24</sup> According to some epidemiological surveys,  
27 up to two thirds of nurses have suffered from musculoskeletal disorders at least once in their  
28 working life for at least 14 days.<sup>25</sup> Physical therapists are another type of HCWs with direct patient  
29 contact at high risk for developing musculoskeletal disorders: according to a recent comprehensive  
30 narrative review, their lifetime and yearly prevalence rates are 55–91% and 40–91.3%, respectively.  
31 Injuries generally affect lower back, neck, upper back and shoulders.<sup>26</sup>

32 Physical violence represents another occupational hazard, which severely impacts on HCWs' well-  
33 being and job motivation, affecting health-care provision and quality.<sup>27</sup> According to the World  
34 Health Organization (WHO) estimates, from 8% to 38% of HCWs have suffered from assaults  
35 perpetrated by patients or visitors at least once, at some point in their careers. Recently, the WHO,  
36 the "International Labor Organization" (ILO), the "International Council of Nurses" (ICN) and the  
37  
38  
39  
40  
41  
42  
43  
44  
45  
46  
47  
48  
49  
50  
51  
52  
53  
54  
55  
56  
57  
58  
59  
60



1  
2  
3 “Public Services International” (PSI) have jointly developed a guideline entitled "Framework  
4 guidelines for addressing workplace violence in the health sector".<sup>28</sup> Physical violence represents a  
5 major source of injuries among HCWs, especially those working in psychiatric wards.<sup>29</sup> According  
6 to a recent review of the literature, in acute psychiatric units, lifetime rates of overall assaults,  
7 physical and verbal threats and sexual harassment are 24-80%, 46-78.6%, 43-78.6% and 9.5-37.2%,  
8 respectively. Complications of such episodes include fractures, eye injuries, and permanent  
9 disability, as well as psychological symptoms, such as anxiety, depression, post-traumatic stress  
10 disorder (PTSD), or avoidance behavior.<sup>30,31</sup> Another hospital ward in which violence/assault can be  
11 experienced is the emergency department (ED): according to a recent qualitative meta-synthesis,  
12 ED staff perceives aggression as unavoidable and feels isolated in its management.<sup>32</sup> Aggressors  
13 usually suffer from psychiatric disorders, have a history of drug and alcohol use, possess weapons,  
14 are victims of violence and are unable to rationally cope with situational crises.<sup>33</sup> In recent years, a  
15 rise in the number of assault episodes against HCWs has been observed: for example, in a  
16 University teaching hospital in the northern part of Italy, non-fatal violence events increased from  
17 20.65/10,000 in 2012 to 22.81/10,000 in 2014, resulting in 431 days of absence from work and  
18 generating a direct cost of € 64,170. Up to 75% of violent episodes occurred in emergency room,  
19 intermediate care, psychiatry and geriatrics wards.<sup>34</sup>

20  
21  
22 Less common sources of injuries among HCWs are represented by chemical exposure (inhalation of  
23 anesthetics, solvents, detergents or reagents)<sup>35</sup> or exposure to physical agents (such as ionizing and  
24 non ionizing radiations).<sup>36</sup>

25  
26  
27 A particular type of injury is also known to occur among commuters. Some scholars conducted  
28 research among shift and non-shift workers and found a strict, statistically significant relationship  
29 between shift-work condition and the presence of excess daytime sleepiness.<sup>37-40</sup> Due to workforce  
30 shortage, high workloads, and night shifts, 32% of HCWs report not to get enough sleep.<sup>40</sup>

31  
32  
33 Systematically identifying and, then, intervening to alter workplace conditions associated with  
34 exposure to health hazards may be an important tool for primary prevention.<sup>41</sup>

## 35 36 37 **PURPOSES AND OBJECTIVES**

### 38 39 **Review aims**

40  
41  
42 The study aims will be to i) identify and map the existing literature concerning injury rate among  
43 HCWs in Western countries in terms of incidence/prevalence and its determinants, the occupational  
44 and economic burden generated by injuries and the preventive measures and strategies that can be  
45 adopted to curb injury rate, and to ii) establish the breadth of the relevant scholarly literature.

## Review objectives

Review objectives will be to i) provide a comprehensive overview of any study focusing on injuries among HCWs in Western countries; ii) identify the most frequent kind of injuries among HCWs, iii) identify the type(s) of HWCs more prone to injuries, iv) identify which variable(s) impact(s) on injuries occurrence among HCWs, v) quantify the burden of injuries among HCWs in terms of related disabilities, residual working capability, absence from work and generated direct/indirect costs, vi) identify the preventive measures that can effectively curb the occurrence of injuries among HCWs, and vii) disseminate review findings on the published literature about injuries among HCWs.

## METHODS

### Review questions

The review questions are: i) What is the incidence/prevalence rate of injuries among HCWs in Western countries? ii) What are the determinants of injuries among HCWs in Western countries? iii) What is the type of injury most commonly occurring among HCWs in Western countries? iv) Among the different professional figures within the umbrella term of HCWs, which one(s) is/are the most affected by injuries in Western countries? v) What is the burden imposed by injuries among HCWs in terms of related disabilities, residual working capability, absence from work and generated direct/indirect costs? vi) What are the state-of-art preventive measures that can be adopted in order to effectively reduce injuries among HCWs in Western countries?

### Study design

In order to properly address the research questions, a scoping review will be performed using the 6-stage methodological framework initially proposed by Arksey and O'Malley.<sup>42</sup> This framework comprises 6 steps: namely, i) identifying the research question(s); ii) identifying relevant studies; iii) study selection; iv) charting the data; v) collating, summarizing and reporting the results; and vi) consultation exercise.<sup>43</sup> The conceptual scheme has been made more detailed and explicit by Levac, Colquhoun and O'Brien,<sup>44</sup> further refined by Colquhoun and collaborators,<sup>45</sup> and subsequently modified by the JBI in the "JBI scoping review methods" manual.<sup>46</sup>

The specific methodology of the scoping review<sup>46,47</sup> was chosen to take into account both the nature and the specific requests of a national project co-funded and performed in collaboration between the Department of Health Sciences (DISSAL), Occupational Medicine - University of Genoa, Italy, and the "Istituto Nazionale per l'Assicurazione contro gli Infortuni sul Lavoro" (in Italian, "National Institute for Insurance Against Accidents at Work", INAIL). This required a quick assessment of a diverse amount of scholarly literature, aiming more for breadth rather than for depth. As such, other

1  
2  
3 types of review, such as systematic reviews, umbrella reviews or rapid reviews,<sup>48</sup> were not deemed  
4 methodologically effective,.

5  
6 As maintained by Arksey and O'Malley,<sup>42</sup> scoping reviews may be utilized to assess the topology of  
7 a vast body of literature, in terms of current gaps of knowledge and future prospects.<sup>42,49,50</sup> These  
8 aims corresponded to the objectives of our project.  
9

### 10 11 **Drafting and registration of the study protocol**

12 This protocol is reported according to the “Preferred Reporting Items for Systematic Reviews and  
13 Meta-Analysis – Protocols” (PRISMA – P) guidelines.<sup>51</sup> However, despite the recommendation of  
14 these guidelines, it was not possible to register the scoping review protocol in the “International  
15 Prospective Register of Systematic Reviews” (PROSPERO),<sup>52</sup> in that it, currently, does not accept  
16 scoping review protocols.  
17  
18  
19  
20  
21  
22

### 23 **Stage I: Identifying the research question(s)**

24  
25 Five authors (NLB, GD, VM, AT, and PD) developed the research questions, whereas the other  
26 authors (VP, CB, RL, FB, BDA, EM, AM, and ND) aided in developing the research questions. The  
27 research objectives and questions have been formulated and shaped as they are stated in the  
28 previous sections “Purposes and objectives” and “Review questions”.  
29  
30  
31  
32

### 33 **Stage II: Identifying relevant studies**

34  
35 The identification of relevant studies will follow the three-step process recommended by the JBI:  
36 namely, i) first step or preliminary search conducted at least on two databases, ii) preparation of a  
37 list of search terms and words to guide the subsequent process and run of the search on a larger  
38 number of databases using previously identified keywords, and iii) eventual additional searches  
39 (cross-checking/cross-referencing of reference lists of potentially eligible studies, hand-searching in  
40 target journals relevant to the topic, etc.).  
41  
42  
43  
44  
45  
46

#### 47 *Preliminary literature search*

48  
49 We have carried out a preliminary literature search on the topic of interest in order to preliminarily  
50 clarify inclusion/exclusion criteria. After familiarizing with the literature, we could further  
51 implement/expand and/or modify/refine the targeted search strategy, with the help of an expert and  
52 qualified research librarian.  
53  
54  
55  
56

57 The preliminary literature search was undertaken for two widely used scholarly databases  
58 (PubMed/MEDLINE and Scopus), using “healthcare injuries” as keywords and adopting the time  
59 filter, resulting in 27,844 and 139,073 studies, respectively. In the second step, the research team  
60

1  
2  
3 has inspected titles and abstracts of potentially relevant articles and has prepared a list of pertinent  
4 words and index terms to inform the subsequent search strategy process.  
5  
6

### 7 *Structured search strategy*

8  
9

10 Based on the previously prepared list of key terms, a systematic literature search will be performed  
11 in several scholarly database, including PubMed/MEDLINE (NLM), Scopus, SciVerse  
12 ScienceDirect, Science Citation Index Expanded (SCIE) and Social Sciences Citation Index (SSCI)  
13 from the ISI/Web of Science (WoS), ProQuest Research Library, ABI/INFORM, CBCA, *via* the  
14 UNO per TUTTI Primo Central (Ex Libris) platform databases.  
15  
16  
17

18  
19 This will include all studies reporting epidemiological figures of injuries among HCWs in Western  
20 countries in terms of prevalence/incidence rates. The search will be performed using a proper string  
21 of relevant search terms based on controlled vocabulary and Boolean connectors (**Table 1**). For  
22 PubMed/MEDLINE, for instance, Medical Subject Headings (MeSH) key terms and wild card  
23 option (truncated key terms) will be utilized. This structured search strategy will be adapted for the  
24 other databases, in order to obtain database-specific search strategies. When it will not be possible  
25 to make a decision on a study's inclusion or exclusion based on the abstract, the full text of the  
26 study will be examined. During this process, we will utilize the "Peer Review of Electronic Search  
27 Strategies (PRESS) 2015 Guideline statement" as a guide.<sup>53</sup>  
28  
29  
30  
31  
32  
33  
34  
35

36 In the third step of the search strategy, we will scan reference lists of the chosen studies and prior  
37 reviews. Additionally, we will hand-search in target journals relevant to the topic under study.  
38  
39

40 Five authors (NLB, GD, VM, AT, and PD) will contribute to the identification of relevant studies,  
41 helped by the other authors (VP, CB, RL, FB, BDA, EM, AM, and ND).  
42  
43

### 44 **Stage III: Study selection**

45

46 Once the search strategy is successfully completed, search results will be collated and exported to  
47 EndNote V.X7 (Clarivate Analytics). Duplicates will be automatically removed before the file  
48 containing a set of unique records is provided to reviewers for further processing (i.e., study  
49 screening and selection).  
50  
51  
52

53  
54 The studies will be independently screened by two authors (NLB and GD), looking at study titles  
55 and abstracts for potential eligibility. Screening questions will be developed and pilot-tested with a  
56 subset of records randomly chosen before implementation. The inter-rater agreement will be  
57 assessed using the  $\kappa$  statistics and will be resolved through discussion; a third reviewer (PD), acting  
58 as a final referee, will be involved if necessary.  
59  
60

### *Inclusion criteria*

Studies meeting the following PICO criteria will be considered for inclusion:<sup>54</sup>

- P (patient, problem or population): HCWs (of any type, medical, nursing or dental practitioners, trainees/residents, other health allied professionals, central supply workers and technicians) working in Western countries;
- I (exposure or phenomenon of interest): injuries (of any type, due to exposure to biological, chemical, physical/ergonomic risks and hazards);
- C (comparison, control or comparator): different types of HCWs (medical *versus* nursing or dental practitioners, trainees or residents); exposed HCWs *versus* non exposed; before and after a preventive program;
- O (outcome/outcomes of interest): prevalence/incidence and determinants of injuries, occupational burden (in terms of related disabilities and absence from work), and generated economic burden (in terms of direct and indirect costs).

Furthermore, the following criteria will be taken into consideration:

- Study design/characteristics: original articles, prevalence/incidence studies;
- Time: a time filter/restraint will be applied. Only papers written between 2000 and 2008 will be considered;
- Languages: no language filter/restraint will be applied. Included non-English articles will be acquired in full-text and translated by expert translators of the University of Genoa, Italy.

### *Exclusion criteria*

Investigations not meeting with the above-stated PICO criteria or with insufficient information and studies designed as editorials, letters to editor, commentaries, expert opinions, case reports, case series, and reviews will be excluded.

### *Selected study reporting*

Details of the literature search and screening results will be both summarized narratively and pictorially presented using the “Preferred Reporting Items for Systematic reviews and Meta-Analyses” (PRISMA) flow diagram (Figure 1).<sup>55</sup> Besides this, we will provide a table of excluded studies with reasons for their exclusion, in our published final scoping review.

### **Stage IV: Charting the data**

1  
2  
3 An *ad hoc* data extraction template will be developed that reflects the research questions, the  
4 purposes/objectives and the aims of the review. It will be used both for confirming study relevance  
5 and for data abstraction. More in detail, it will include gathering information regarding the key  
6 characteristics of the studies, such as study authors, year of publication, study population – type(s)  
7 of HCWs recruited – and study country, study design, percentage of male HCWs, mean age, sample  
8 size, attrition rate, professional experience years, working setting, injury prevalence/incidence rate,  
9 knowledge, attitudes and practices concerning the adoption of standard procedures, and injuries-  
10 related burden (Table 2) These *a priori* data items have been individuated and developed through a  
11 preliminary exercise by all the research team.  
12  
13  
14  
15  
16  
17  
18

19 The data abstraction process will be performed independently by two authors (NLB and GD) and  
20 will be pilot-tested on a small sample of studies randomly selected, until consensus is reached.  
21 Based on this pilot test, if deemed necessary by the research team, the data extraction form will be  
22 reviewed and revised, in order to capture any relevant information of the included studies. Any  
23 change to the data collection form will be documented and explained. To assist this process of the  
24 scoping review, the “Covidence” software (Cochrane) for systematic review management will be  
25 used.  
26  
27  
28  
29  
30  
31

### 32 **Stage V: Collating, summarizing and reporting the results**

33

34 While the stage V aims at providing a summary and synthesis of the findings, Levac et al.<sup>44</sup> have  
35 suggested breaking this review step into the following three smaller and distinct phases: namely, a)  
36 data collation and analysis; b) report of the results and outcome(s) delivery in such a way to guide  
37 and inform the overall study purposes/objectives, aims and research questions; and c) taking into  
38 account the meaning of the findings in relation to the study aims, purposes/objectives and research  
39 questions and discussion of the potential, practical implications that findings may have on future  
40 research, practice and policy.  
41  
42  
43  
44  
45  
46  
47

48 The data collected during the stage IV will be stored in an Excel electronic database. Besides the  
49 narrative review describing how the results relate to the review aims, purposes/objectives and  
50 questions, we will provide a table with the main characteristics of the studies included in the  
51 scoping review. We will also assess the frequency of the number of studies investigating i) the  
52 type(s) of HCWs recruited, ii) the types of injuries, as well as iii) the outcome studied (injury rate  
53 and determinants; burden generated by the injuries; and preventive measures that can be adopted to  
54 curb the injury rate).  
55  
56  
57  
58  
59  
60



1  
2  
3 Findings will be reported according to the PRISMA Extension for Scoping Reviews (PRISMA –  
4 ScR) checklist.<sup>56</sup>  
5  
6

### 7 **Stage VI: Consultation exercise and stakeholder involvement**

8  
9

10 Both Arksey and O'Malley<sup>42</sup> and Levac et al.<sup>44</sup> have suggested that the consultation exercise stage  
11 could provide opportunities for the involvement of key stakeholders, providing insights beyond  
12 what can be found in the scholarly literature. In the development of our planned scoping review,  
13 there will be an ongoing involvement of the relevant scientific societies, such as the Italian Society  
14 of Occupational Medicine (“Società Italiana di Medicina del Lavoro”, SIML) and of the national  
15 and international networks of occupational physicians. Prior to publication and dissemination of the  
16 findings, we will once again consult with these stakeholders in order to receive their feedback and  
17 to ensure that the data have been clearly and accurately presented.  
18  
19  
20  
21  
22  
23

### 24 **Patient and public involvement**

25  
26

27 In the development of the planned scoping review, there will be no specific patient and public  
28 involvement.  
29  
30  
31

## 32 **DISCUSSION**

33  
34

### 35 **Implications**

36  
37

38 HCWs are subject to different risk factors and risky behaviors that may have a serious impact on  
39 their health and safety, consequently imposing an economic burden for all non-fatal and fatal work-  
40 related injuries and illnesses.<sup>57,58</sup> From this viewpoint, a major challenge for Western Countries is to  
41 promote health and wellbeing of individuals both at the occupational and community level in order  
42 to enable workforce to stay at work longer and healthier.<sup>59,60</sup> Mapping the existing literature on the  
43 relevant topic related to injuries in the healthcare setting enables to understand both the traditional  
44 and the emerging health problems at work (such as the impact of ageing, musculoskeletal and  
45 psychosocial problems, shift working, gender perspectives, re-emergent infectious diseases),  
46 providing useful insights to better interpret them and their determinants, within the actual transition  
47 phase to the service sector. This approach underpins the planning and implementation of high-  
48 quality occupational health interventions in the currently changing world of work.<sup>61</sup>  
49  
50  
51  
52  
53  
54  
55

56  
57 The proposed scoping review is expected to contribute to the existing scholarly literature with the  
58 potential to influence and inform health practice, education, policy, and future research in the field.  
59  
60

1  
2  
3 Currently, there is not a review of studies performed in Western Countries concerning injuries  
4 among HCWs. As such, this scoping review will provide the first rigorous analytical, updated  
5 synthesis of primary research data concerning the epidemiology and the economic and occupational  
6 burden of injuries among HCWs in Western countries. Stratifying according to the work tasks and  
7 type of injuries could add meaningful information and increase the understanding of the  
8 determinants of injuries among HCWs.  
9

10  
11  
12  
13  
14 Due to the changing conditions of our society and of healthcare settings, together with classical  
15 occupational risk factors, new hazardous factors are emerging and ensuring health protection in the  
16 workplace is mandatory. Acquiring good evidence concerning the epidemiology of injuries and  
17 associated determinants among HCWs in Western countries is the scientific basis for implementing  
18 programs and properly orienting the activities of occupational health services and policies. This  
19 would bring considerable benefits not only to workers but to the entire organizations and societies,  
20 matching the objective of occupational and public health programs.  
21  
22

23  
24  
25  
26  
27 Furthermore, this scoping review will allow to assess the scholarly literature for knowledge gaps  
28 that researchers could be able to address, focusing their future research activities on. Being  
29 conducted in partnership with the INAIL and the national and international networks of  
30 occupational physicians, the planned scoping review will be useful as well for health decision- and  
31 policy-makers in order to develop, design, implement and foster *ad hoc* adequate, cost-effective  
32 policies and practices for primary prevention and educational programs.  
33  
34  
35  
36

### 37 38 *Strengths and limitations* 39

40  
41 The major strength is given by the rigor, transparency, and reproducibility of our review approach.  
42 The scoping review will be, indeed, based on the present scoping review protocol, which has been  
43 submitted separately for review and publication, in order to ensure high methodological standards.  
44 Any amendments to the present scoping review protocol will be precisely documented, listed and  
45 explained in the final review publication(s).  
46  
47  
48

49  
50 Another strength is given by our multi-disciplinary team, which comprises an experienced  
51 epidemiologist and research methodologist (NLB), a biologist with a background in the field of  
52 public health (VP), occupational physicians, coming from academic setting (GD, AT, FB, BDA,  
53 EM, AM, ND, and PD), and occupational physicians with expertise in the field of social security  
54 and insurance (CB, RL, and VM).  
55  
56  
57  
58  
59  
60



1  
2  
3 However, we have to anticipate also some shortcomings. The major limitation concerns time filter  
4 (studies published between 2000 and 2018 will be included in the scoping review), which, on the  
5 other hand, enables an updated, direct comparison of the findings with the epidemiological figures  
6 available at national and local INAIL Centers. Moreover, as the process of scoping reviews does not  
7 include a formal critical quality assessment and appraisal of included studies, reported findings may  
8 lack confidence and validity.  
9

### 14 **Ethics**

16 No ethical clearance is required for the present scoping review protocol and for its subsequent  
17 implementation steps, in that it will undertake a knowledge synthesis and an analysis of data that  
18 have been already collected and published.  
19  
20  
21

### 23 **Dissemination**

25 Following the successful completion of the scoping review, its findings will be submitted to peer-  
26 reviewed journals for potential publication(s) and will be the object of *ad hoc* oral/poster  
27 communication(s) in relevant national and international scientific congresses, and conferences. All  
28 members of the research team have established relationships with national and international  
29 occupational medicine networks, which will also be used to further disseminate the review findings.  
30  
31  
32  
33

35 We will not be able to provide any recommendations, since the selected studies will not be critically  
36 and formally appraised for methodological quality. The findings of this scoping review could be  
37 used to guide the education of HCWs (for example, to inform the development and implementation  
38 of courses for continuous medical learning) and the health policy- and decision-making process.  
39  
40  
41  
42  
43  
44  
45  
46  
47  
48  
49  
50  
51  
52  
53  
54  
55  
56  
57  
58  
59  
60

## References

- 1) World Health Organization. Working Together for Health: World Health Report 2006. Geneva: Switzerland, 2006.
- 2) Joseph B, Joseph M. The health of the healthcare workers. *Indian J Occup Environ Med* 2016;20(2):71–72.
- 3) Adams BO, Dal Poz MR, Shengelia B, *et al.* Human, Physical, and Intellectual Resource Generation: Proposals for Monitoring. In Murray, C.J.L and Evans, D. (eds) Health Systems Performance Assessment: Debates, Methods and Empiricism. Geneva: World Health Organization: 273-287, 2003.
- 4) Diallo K, Zurn P, Gupta N, *et al.* Monitoring and evaluation of human resources for health: an international perspective. *Hum Resour Health* 2003;1(1):3.
- 5) Dressner MA. Hospital workers: an assessment of occupational injuries and illnesses. *Monthly Labor Review*, U.S. Bureau of Labor Statistics, June 2017.
- 6) Miller K. Risk factors and impacts of occupational injury in healthcare workers: A critical review. *OA Musculoskeletal Medicine* 2013 Mar 01;1(1):4.
- 7) Young TN, Arens FJ, Kennedy GE, *et al.* Antiretroviral post-exposure prophylaxis (PEP) for occupational HIV exposure. *Cochrane Database Syst Rev* 2007;(1):CD002835.
- 8) Rischitelli G, Harris J, McCauley L, *et al.* The risk of acquiring hepatitis B or C among public safety workers: a systematic review. *Am J Prev Med.* 2001 May;20(4):299-306.
- 9) Westermann C, Peters C, Lisiak B, *et al.* The prevalence of hepatitis C among healthcare workers: a systematic review and meta-analysis. *Occup Environ Med.* 2015 Dec;72(12):880-8.
- 10) Dini G, Toletone A, Sticchi L, *et al.* Influenza vaccination in healthcare workers: A comprehensive critical appraisal of the literature. *Hum Vaccin Immunother.* 2017 Aug 8:1-18.
- 11) Uden L, Barber E, Ford N, *et al.* Risk of Tuberculosis Infection and Disease for Health Care Workers: An Updated Meta-Analysis. *Open Forum Infect Dis.* 2017 Aug 29;4(3):ofx137.
- 12) Placidi D, Tonozzi B, Alessio L, Porru S. Tuberculin skin test (TST) survey among healthcare workers (HCWs) in hospital: a systematic review of the literature. *G Ital Med Lav Ergon.* 2007 Jul-Sep;29(3 Suppl):409-11.
- 13) Riccò M, Vezzosi L, Odone A, *et al.* Invasive Meningococcal Disease on the Workplaces: a systematic review. *Acta Biomed.* 2017 Oct 23;88(3):337-351.

- 14) van den Hoogen A, Duijn JM, Bode LGM, *et al.* Systematic review found that there was moderate evidence that vaccinating healthcare workers prevented pertussis in infants. *Acta Paediatr.* 2017, in press.
- 15) Leone Roberti Maggiore U, Scala C, *et al.* Susceptibility to vaccine-preventable diseases and vaccination adherence among healthcare workers in Italy: A cross-sectional survey at a regional acute-care university hospital and a systematic review. *Hum Vaccin Immunother.* 2017 Feb;13(2):470-476.
- 16) Cooke CE, Stephens JM. Clinical, economic, and humanistic burden of needlestick injuries in healthcare workers. *Med Devices (Auckl)* 2017;10:225-235.
- 17) Prüss-Ustün A, Rapiti E, Hutin Y. Estimation of the global burden of disease attributable to contaminated sharps injuries among health-care workers. *Am J Ind Med* 2005;48(6):482.
- 18) Auta A, Adewuyi EO, Tor-Anyiin A, *et al.* Global prevalence of percutaneous injuries among healthcare workers: a systematic review and meta-analysis. *Int J Epidemiol* 2018, in press..
- 19) Elseviers MM, Arias-Guillén M, Gorke A, *et al.* Sharps injuries amongst healthcare workers: review of incidence, transmissions and costs. *J Ren Care* 2014 Sep;40(3):150-6.
- 20) Deuffic-Burban S, Delarocque-Astagneau E, Abiteboul D, *et al.* Blood-borne viruses in health care workers: prevention and management. *J Clin Virol* 2011;52(1):4-10.
- 21) Baxi R, Mytton OT, Abid M, *et al.* Outbreak report: nosocomial transmission of measles through an unvaccinated healthcare worker-implications for public health. *J Public Health (Oxf)* 2014 Sep;36(3):375-81.
- 22) Amendola A, Bianchi S, Frati ER, *et al.* Ongoing large measles outbreak with nosocomial transmission in Milan, northern Italy, March-August 2017. *Euro Surveill* 2017 Aug 17;22(33).
- 23) Edlich RF, Hudson MA, Buschbacher RM, *et al.* Devastating injuries in healthcare workers: description of the crisis and legislative solution to the epidemic of back injury from patient lifting. *J Long Term Eff Med Implants* 2005;15(2):225-41.
- 24) Nelson AL, Collin J, Knibbe H, *et al.* Safer patient handling. *Nurs Manage* 2007;38(3):26-32.
- 25) Delloiacono N. Musculoskeletal safety for older adults in the workplace: review of current best practice evidence. *Workplace Health Saf* 2015;63(2):48-53.
- 26) Milhem M, Kalichman L, Ezra D, *et al.* Work-related musculoskeletal disorders among physical therapists: A comprehensive narrative review. *Int J Occup Med Environ Health.* 2016;29(5):735-47.

- 1
- 2
- 3 27) Dillon BL. Workplace violence: impact, causes, and prevention. *Work* 2012;42(1):15-20.
- 4
- 5 28) International Labour Office (ILO), International Council of Nurses (ICN), World Health
- 6 Organization (WHO), Public Services International (PSI). Joint Programme on Workplace
- 7 Violence in the Health Sector. Geneva, 2002.
- 8
- 9
- 10 29) Spaducci G, Stubbs B, McNeill A, Stewart D, Robson D. Violence in mental health settings:
- 11 A systematic review. *Int J Ment Health Nurs*. 2018 Feb;27(1):33-45.
- 12
- 13 30) d'Ettorre G, Pellicani V. Workplace Violence Toward Mental Healthcare Workers
- 14 Employed in Psychiatric Wards. *Saf Health Work* 2017;8(4):337-342.
- 15
- 16 31) Luftman K, Aydelotte J, Rix K, et al. PTSD in those who care for the injured. *Injury*. 2017
- 17 Feb;48(2):293-296.
- 18
- 19 32) Ashton RA, Morris L, Smith I. A qualitative meta-synthesis of emergency department staff
- 20 experiences of violence and aggression. *Int Emerg Nurs*. 2018, in press.
- 21
- 22 33) Gillespie GL, Gates DM, Miller M, et al. Workplace violence in healthcare settings: risk
- 23 factors and protective strategies. *Rehabil Nurs* 2010;35(5):177-84.
- 24
- 25 34) Sossai D, Molina FS, Amore M, et al. Analysis of incidents of violence in a large Italian
- 26 hospital. *Med Lav*. 2017 Oct 27;108(5):6005.
- 27
- 28 35) Molina Aragonés JM, Ayora Ayora A, Barbara Ribalta A, et al. Occupational exposure to
- 29 volatile anaesthetics: a systematic review. *Occup Med (Lond)*. 2016 Apr;66(3):202-7.
- 30
- 31 36) Caciari T, Capozzella A, Tomei F, et al. Professional exposure to ionizing radiations in
- 32 health workers and white blood cells. *Ann Ig*. 2012 Nov-Dec;24(6):465-74.
- 33
- 34 37) Garbarino S, Traversa F, Spigno F, et al. Sleepiness, sleep disorders and risk of occupational
- 35 accidents. *G Ital Med Lav Ergon*. 2011 Jul-Sep;33(3 Suppl):207-11.
- 36
- 37 38) Garbarino S, Repice AM, Traversa F, et al. Commuting accidents: the influence of excessive
- 38 daytime sleepiness. A review of an Italian Police officers population. *G Ital Med Lav Ergon*
- 39 2007;29(3 Suppl):324-6.
- 40
- 41 39) Caruso CC. Negative impacts of shiftwork and long work hours. *Rehabil Nurs*. 2014 Jan-
- 42 Feb;39(1):16-25.
- 43
- 44 40) Booker LA, Magee M, Rajaratnam SMW, et al. Individual vulnerability to insomnia,
- 45 excessive sleepiness and shift work disorder amongst healthcare shift workers. A systematic
- 46 review. *Sleep Med Rev*. 2018
- 47
- 48 41) Copello F, Garbarino S, Messineo A, et al. Occupational Medicine and Hygiene: applied
- 49 research in Italy. *J Prev Med Hyg* 2015;56(2):E102-10.
- 50
- 51 42) Arksey H, O'Malley L. Scoping studies: Towards a Methodological Framework. *Int J Soc*
- 52 *Res Methodol* 2005;8:19–32.
- 53
- 54
- 55
- 56
- 57
- 58
- 59
- 60

- 1  
2  
3 43) Khalil H, Peters M, Godfrey CM, et al. An Evidence-Based Approach to Scoping Reviews.  
4 *Worldviews Evid Based Nurs* 2016;13(2):118-23. Levac D, Colquhoun H, O'Brien KK.  
5 Scoping studies: advancing the methodology. *Implement Sci* 2010;5:69.  
6  
7  
8 44) Colquhoun HL, Levac D, O'Brien KK, et al. Scoping reviews: time for clarity in definition,  
9 methods, and reporting. *J Clin Epidemiol*. 2014 Dec;67(12):1291-4.  
10  
11 45) Tricco AC, Lillie E, Zarin W, et al. A scoping review on the conduct and reporting of  
12 scoping reviews. *BMC Med Res Methodol* 2016;16:15.  
13  
14 46) Peters MD, Godfrey CM, Khalil H, et al. Guidance for conducting systematic scoping  
15 reviews. *Int J Evid Based Healthc* 2015;13(3):141-146.  
16  
17 47) Grant MJ, Booth A. A typology of reviews: an analysis of 14 review types and associated  
18 methodologies. *Health Info Libr J* 2009;26(2):91-108.  
19  
20 48) Mays N, Roberts E, Popay J. Synthesising research evidence. In N. Fulop, P. Allen, A.  
21 Clarke, & N. Black (Eds.), *Studying the organisation and delivery of health services:  
22 Research methods* (pp. 188-219). London: Routledge, 2001.  
23  
24 49) Peterson J, Pearce PF, Ferguson LA, et al. Understanding scoping reviews: Definition,  
25 purpose, and process. *J Am Assoc Nurse Pract* 2017;29(1):12-16.  
26  
27 50) Shamseer L, Moher D, Clarke M, et al. Preferred reporting items for systematic review and  
28 meta-analysis protocols (PRISMA-P) 2015: elaboration and explanation. *BMJ*  
29 2015;349(jan02 1):g7647.  
30  
31 51) Chien PF, Khan KS, Siassakos D. Registration of systematic reviews: PROSPERO. *BJOG*  
32 2012;119(8):903-5.  
33  
34 52) McGowan J, Sampson M, Salzwedel DM, et al. PRESS Peer Review of Electronic Search  
35 Strategies: 2015 Guideline Statement. *J Clin Epidemiol*. 2016 Jul;75:40-6.  
36  
37 53) Thabane L, Thomas T, Ye C, Paul J. Posing the research question: Not so simple. *Can J*  
38 *Anaesth*. 2009;56:71-9.  
39  
40 54) Moher D, Liberati A, Tetzlaff J, et al. Preferred reporting items for systematic reviews and  
41 meta-analyses: the PRISMA Statement. *Open Med* 2009;3(3):e123-30.  
42  
43 55) Tricco AC, Lillie E, Zarin W, et al. PRISMA Extension for Scoping Reviews (PRISMA-  
44 ScR): Checklist and Explanation. *Ann Intern Med* 2018 Oct 2;169(7):467-473.  
45  
46 56) European Agency for Safety and Health at Work (EU-OSHA). The economics of  
47 occupational safety and health - the value of OSH to society. 2017. Available from:  
48 <https://visualisation.osha.europa.eu/osh-costs#!/>  
49  
50  
51  
52  
53  
54  
55  
56  
57  
58  
59  
60

- 1  
2  
3 57) Heuvel S, Zwaan L, Dam LV, *et al.* Estimating the costs of work-related accidents and ill-  
4 health: An analysis of European data sources. Luxembourg: European Agency for Safety  
5 and Health at Work (EU-OSHA), 2017.  
6  
7  
8 58) Burton J. WHO Healthy workplace framework and model: Background and supporting  
9 literature and practices. World Health Organization, 2010.  
10  
11 59) Westerholm P, Walters D. Supporting Health at Work: International Perspectives on  
12 Occupational Health Services. IOSH Services, 2007.  
13  
14  
15 60) Leijon O, Lindahl E, Torén K, *et al.* First-time decisions regarding work injury annuity due  
16 to occupational disease: a gender perspective. *Occup Environ Med* 2014 Feb;71(2):147-53.)  
17  
18 61) Steel J, Luyten J, Godderis L. Occupational Health: The Global Evidence and Value.  
19 Society of Occupational Medicine, International SOS Foundation, KU Leuven University,  
20 2018.  
21  
22  
23  
24  
25  
26  
27  
28  
29  
30  
31  
32  
33  
34  
35  
36  
37  
38  
39  
40  
41  
42  
43  
44  
45  
46  
47  
48  
49  
50  
51  
52  
53  
54  
55  
56  
57  
58  
59  
60

1  
2  
3 **Tables.**  
4

5 **Table 1. Planned search strategy.**  
6

| SEARCH STRATEGY<br>ITEM | SEARCH STRATEGY                                                                                                                                                                                                                                                                                                                                                                                                                                                                                                                                                                                                                                                                                                                                                                                                                                                                                                                                                                                                                                                                                                                                                                                                                                                                                                                                                                                                                                                                                                                                                                                                                                                                                                                                                                                                                                                            |
|-------------------------|----------------------------------------------------------------------------------------------------------------------------------------------------------------------------------------------------------------------------------------------------------------------------------------------------------------------------------------------------------------------------------------------------------------------------------------------------------------------------------------------------------------------------------------------------------------------------------------------------------------------------------------------------------------------------------------------------------------------------------------------------------------------------------------------------------------------------------------------------------------------------------------------------------------------------------------------------------------------------------------------------------------------------------------------------------------------------------------------------------------------------------------------------------------------------------------------------------------------------------------------------------------------------------------------------------------------------------------------------------------------------------------------------------------------------------------------------------------------------------------------------------------------------------------------------------------------------------------------------------------------------------------------------------------------------------------------------------------------------------------------------------------------------------------------------------------------------------------------------------------------------|
| Databases               | PubMed/MEDLINE (NLM), Scopus, SciVerse ScienceDirect, Science Citation Index Expanded and Social Sciences Citation Index from ISI/Web of Science, ProQuest Research Library, ABI/INFORM, CBCA, <i>via</i> the UNO per TUTTI Primo Central (Ex Libris) platform                                                                                                                                                                                                                                                                                                                                                                                                                                                                                                                                                                                                                                                                                                                                                                                                                                                                                                                                                                                                                                                                                                                                                                                                                                                                                                                                                                                                                                                                                                                                                                                                             |
| Language filter         | None                                                                                                                                                                                                                                                                                                                                                                                                                                                                                                                                                                                                                                                                                                                                                                                                                                                                                                                                                                                                                                                                                                                                                                                                                                                                                                                                                                                                                                                                                                                                                                                                                                                                                                                                                                                                                                                                       |
| Time filter             | 2000-2018                                                                                                                                                                                                                                                                                                                                                                                                                                                                                                                                                                                                                                                                                                                                                                                                                                                                                                                                                                                                                                                                                                                                                                                                                                                                                                                                                                                                                                                                                                                                                                                                                                                                                                                                                                                                                                                                  |
| Spatial filter          | Western countries                                                                                                                                                                                                                                                                                                                                                                                                                                                                                                                                                                                                                                                                                                                                                                                                                                                                                                                                                                                                                                                                                                                                                                                                                                                                                                                                                                                                                                                                                                                                                                                                                                                                                                                                                                                                                                                          |
| Keywords                | <p>1. "healthcare worker" OR "healthcare workers" OR "healthcare personnel" OR "healthcare staff" OR "health worker" OR "health workers" OR "health personnel" OR "health staff" OR physicians OR physician OR doctors OR doctor OR nurses OR nurse OR practitioners OR practitioner OR "medical students" OR "medical residents" OR "attending residents" OR "hospital technician" OR "hospital technicians" OR "paramedical personnel" OR "paramedical staff" OR "hospital support personnel"</p> <p>2. injury OR injuries OR incident OR incidents OR "occupational injury" OR "occupational injuries" OR "occupational incident" OR "occupational incidents" OR "work related injury" OR "work related injuries" OR "work related incident" OR "work related incidents" OR "workplace-induced injury" OR "workplace-induced injuries" OR "workplace-induced incident" OR "workplace-induced incidents" OR "occupational health hazard" OR "occupational health hazards"</p> <p>3. "exposure incidents" OR "splash exposures" OR "splash exposure" OR needle-sticks OR "sharp objects" OR sharps OR "percutaneous injuries" OR "percutaneous injury"</p> <p>4. "manual handling injury" OR "manual handling injuries" OR "musculoskeletal injury" OR "musculoskeletal injuries"</p> <p>5. "chemical occupational exposure" OR "exposure to inhaled anesthetic" OR "reagent exposure" OR "exposure to reagent" OR "exposure to solvents" OR "solvent exposure" OR "exposure to detergents" OR "detergent exposure"</p> <p>6. "slips, trips and falls" OR "slipping, tripping and falling accidents" OR "accidental fall" OR "same-level fall" OR "same-surface fall" OR stump-and-fall OR step-and-fall OR "forced-rotation-type fall" OR "fall from elevation"</p> <p>7. "violent events" OR violence OR assault OR assaults</p> <p>8. "cuts and wounds" OR "burns"</p> |



1  
2  
3  
4  
5  
6  
7  
8  
9  
10  
11  
12  
13  
14  
15  
16  
17  
18  
19  
20  
21  
22  
23  
24  
25  
26  
27  
28  
29  
30  
31  
32  
33  
34  
35  
36  
37  
38  
39  
40  
41  
42  
43  
44  
45  
46  
47  
48  
49  
50  
51  
52  
53  
54  
55  
56  
57  
58  
59  
60

---

|                    |                                                                                                                                                                                                                                                                                                                                                                                                                                                                                                                                                                                                                                                    |
|--------------------|----------------------------------------------------------------------------------------------------------------------------------------------------------------------------------------------------------------------------------------------------------------------------------------------------------------------------------------------------------------------------------------------------------------------------------------------------------------------------------------------------------------------------------------------------------------------------------------------------------------------------------------------------|
|                    | 9. "motor vehicle accidents" OR "motor vehicle accident" OR "motor vehicle collisions" OR "motor vehicle collision" OR "motor vehicle crash" OR "motor vehicle crashes" OR "motor vehicle near crash" OR "motor vehicle near crashes"                                                                                                                                                                                                                                                                                                                                                                                                              |
|                    | 10. "exposure to ionizing radiation" OR "radiation exposure"                                                                                                                                                                                                                                                                                                                                                                                                                                                                                                                                                                                       |
|                    | 1. AND 2. OR 3. OR 4. OR 5. OR 6. OR 7. OR 8. OR 9. OR 10.                                                                                                                                                                                                                                                                                                                                                                                                                                                                                                                                                                                         |
| Inclusion criteria | <p>P: medical/paramedical students and residents, doctors and nurses, cleaners and porters</p> <p>I: exposure to biological, chemical, physical/ergonomic risk and hazard</p> <p>C: medical versus nursing or dental students; students versus residents; medical versus nursing or dental trainees/residents; exposed HCWs versus non exposed; before and after a preventive program</p> <p>O: prevalence/incidence of injuries and their determinants among healthcare workers in Western countries, related disabilities and absence from work, and generated economic burden (direct/indirect costs)</p> <p>Study design: primary research</p> |
| Exclusion criteria | <p>Studies not meeting with the above-stated PICO criteria</p> <p>Study design: editorial, letter to the editor, commentary, case report, case series, review</p>                                                                                                                                                                                                                                                                                                                                                                                                                                                                                  |
| Target journals    | Occupational and public health journals                                                                                                                                                                                                                                                                                                                                                                                                                                                                                                                                                                                                            |

---



**Table 2. Data planned to be extracted and details/explanations.**

| EXTRACTED DATA                                      | DETAILS                                                                                                                                                                                                       |
|-----------------------------------------------------|---------------------------------------------------------------------------------------------------------------------------------------------------------------------------------------------------------------|
| Study Reference                                     | Names and surnames of authors, year of publication                                                                                                                                                            |
| Study population                                    | Physicians, doctors, nurses, medical students, residents, cleaners, porters                                                                                                                                   |
| Country                                             | Country or countries in which the study or studies was or were carried out                                                                                                                                    |
| Study design                                        | Type of recruitment                                                                                                                                                                                           |
| M%                                                  | Percentage of male healthcare workers                                                                                                                                                                         |
| Age                                                 | Mean age of healthcare workers sample                                                                                                                                                                         |
| Sample number, attrition rate                       | Number of healthcare workers who took part into the survey, number of non responders                                                                                                                          |
| Professional/experience years                       | Years spent in profession by healthcare workers included in the study                                                                                                                                         |
| Working setting                                     | Hospital ward where the injury occurred (for example, emergency room, obstetrics department, surgery department, operating room, outpatient clinic, department of Internal Medicine, patients' room, CCU/ICU) |
| Injury prevalence/incidence rate                    | Prevalence/incidence rates stratified according to the kind of injury                                                                                                                                         |
| Method                                              | Questionnaire (validated, not validated)                                                                                                                                                                      |
| Following standard procedures                       | Prevalence/incidence rates stratified according to the compliance to procedures and guidelines among the different types of healthcare workers                                                                |
| Knowledge, attitudes and practices about PEP        | Prevalence/incidence rates stratified according to the knowledge, attitudes and practices concerning PEP, among the different types of healthcare workers                                                     |
| Clerkship abroad                                    | Periods of training abroad; type of task(s) the healthcare worker was involved in during the training period abroad                                                                                           |
| Reporting/non-reporting to Occupational Departement | Prevalence/incidence rates stratified according                                                                                                                                                               |

---

|    |                                                 |
|----|-------------------------------------------------|
| 1  |                                                 |
| 2  |                                                 |
| 3  |                                                 |
| 4  | to the determinants of the reporting/non-       |
| 5  | reporting, among the different types of         |
| 6  | healthcare workers                              |
| 7  |                                                 |
| 8  | Injuries-related burden                         |
| 9  | Number of days of absence from work,            |
| 10 | disabilities and economic direct/indirect costs |
| 11 | due to injuries                                 |
| 12 |                                                 |
| 13 |                                                 |

---

For peer review only

1  
2  
3  
4  
5  
6  
7  
8  
9  
10  
11  
12  
13  
14  
15  
16  
17  
18  
19  
20  
21  
22  
23  
24  
25  
26  
27  
28  
29  
30  
31  
32  
33  
34  
35  
36  
37  
38  
39  
40  
41  
42  
43  
44  
45  
46  
47  
48  
49  
50  
51  
52  
53  
54  
55  
56  
57  
58  
59  
60

Figures.

Figure 1. Flowchart of selection of studies according to the “Preferred Reporting Items for Systematic Reviews and Meta-analyses” (PRISMA) guidelines.

For peer review only

## Contributors

NLB, GD, VP, CB, RL, VM, AT, FB, BDA, EM, AM, ND, and PD conceived the idea. NLB, GD, VM, AT, and PD developed the research questions. NLB, GD, and PD developed the study methods. VP, CB, RL, FB, BDA, EM, AM, and ND aided in developing the research question and study methods. All authors participated in drafting the article, editing or revising it critically for important intellectual content; all authors gave final approval of the version to be submitted and any revised version.

## Funding

This research was co-funded by the "Istituto Nazionale per l'Assicurazione contro gli Infortuni sul Lavoro (INAIL, National Institute for Insurance Against Accidents at Work)" and the Department of Health Sciences, Occupational Medicine - University of Genoa, Italy.

## Competing interests

None declared.

## Patient consent

Not required.

1  
2  
3  
4  
5  
6  
7  
8  
9  
10  
11  
12  
13  
14  
15  
16  
17  
18  
19  
20  
21  
22  
23  
24  
25  
26  
27  
28  
29  
30  
31  
32  
33  
34  
35  
36  
37  
38  
39  
40  
41  
42  
43  
44  
45  
46  
47  
48  
49  
50  
51  
52  
53  
54  
55  
56  
57  
58  
59  
60

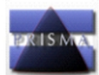

**PRISMA 2009 Flow Diagram**

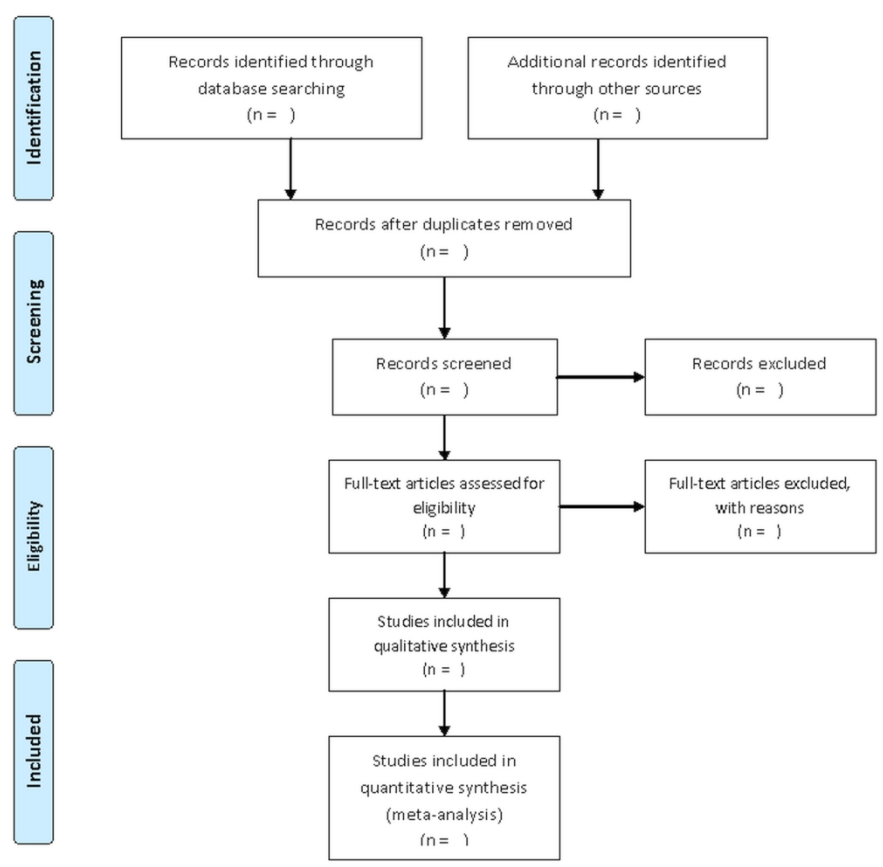

Flowchart of selection of studies according to the "Preferred Reporting Items for Systematic Reviews and Meta-analyses" (PRISMA) guidelines.

226x236mm (300 x 300 DPI)

**PRISMA-P (Preferred Reporting Items for Systematic review and Meta-Analysis Protocols) 2015 checklist: recommended items to address in a systematic review protocol\***

| Section and topic                 | Item No | Checklist item                                                                                                                                                                                  | Page of the documents and details                                                                                                                                                                                                                           |
|-----------------------------------|---------|-------------------------------------------------------------------------------------------------------------------------------------------------------------------------------------------------|-------------------------------------------------------------------------------------------------------------------------------------------------------------------------------------------------------------------------------------------------------------|
| <b>ADMINISTRATIVE INFORMATION</b> |         |                                                                                                                                                                                                 |                                                                                                                                                                                                                                                             |
| Title:                            |         |                                                                                                                                                                                                 |                                                                                                                                                                                                                                                             |
| Identification                    | 1a      | Identify the report as a protocol of a systematic review                                                                                                                                        | Protocol of a scoping review assessing injury rate and determinants among healthcare workers in Western countries (page 1)                                                                                                                                  |
| Update                            | 1b      | If the protocol is for an update of a previous systematic review, identify as such                                                                                                              |                                                                                                                                                                                                                                                             |
| Registration                      | 2       | If registered, provide the name of the registry (such as PROSPERO) and registration number                                                                                                      | In accordance with these guidelines, the scoping review protocol has been submitted to the International Prospective Register of Systematic Reviews (PROSPERO). However, currently, PROSPERO does not accept to register scoping review protocols (page 8). |
| Authors:                          |         |                                                                                                                                                                                                 |                                                                                                                                                                                                                                                             |
| Contact                           | 3a      | Provide name, institutional affiliation, e-mail address of all protocol authors; provide physical mailing address of corresponding author                                                       | Page 1 and page 21. Furthermore, role of each author is outlined in the protocol.                                                                                                                                                                           |
| Contributions                     | 3b      | Describe contributions of protocol authors and identify the guarantor of the review                                                                                                             |                                                                                                                                                                                                                                                             |
| Amendments                        | 4       | If the protocol represents an amendment of a previously completed or published protocol, identify as such and list changes; otherwise, state plan for documenting important protocol amendments | The present protocol is not an amendment.                                                                                                                                                                                                                   |
| Support:                          |         |                                                                                                                                                                                                 |                                                                                                                                                                                                                                                             |
| Sources                           | 5a      | Indicate sources of financial or other support for the review                                                                                                                                   | Sources and the role of the sponsor are indicated at page 7 and at page 21.                                                                                                                                                                                 |
| Sponsor                           | 5b      | Provide name for the review funder and/or sponsor                                                                                                                                               |                                                                                                                                                                                                                                                             |
| Role of sponsor or funder         | 5c      | Describe roles of funder(s), sponsor(s), and/or institution(s), if any, in developing the protocol                                                                                              |                                                                                                                                                                                                                                                             |
| <b>INTRODUCTION</b>               |         |                                                                                                                                                                                                 |                                                                                                                                                                                                                                                             |
| Rationale                         | 6       | Describe the rationale for the review in the context of what is already known                                                                                                                   | Rationale is provided in the background (pages 4-6).                                                                                                                                                                                                        |
| Objectives                        | 7       | Provide an explicit statement of the question(s) the review will                                                                                                                                | Page 7.                                                                                                                                                                                                                                                     |

address with reference to participants, interventions, comparators, and outcomes (PICO)

**METHODS**

|                                   |     |                                                                                                                                                                                                                               |                     |
|-----------------------------------|-----|-------------------------------------------------------------------------------------------------------------------------------------------------------------------------------------------------------------------------------|---------------------|
| Eligibility criteria              | 8   | Specify the study characteristics (such as PICO, study design, setting, time frame) and report characteristics (such as years considered, language, publication status) to be used as criteria for eligibility for the review | Page 8 and table 1. |
| Information sources               | 9   | Describe all intended information sources (such as electronic databases, contact with study authors, trial registers or other grey literature sources) with planned dates of coverage                                         | Page 8 and table 1. |
| Search strategy                   | 10  | Present draft of search strategy to be used for at least one electronic database, including planned limits, such that it could be repeated                                                                                    | Page 8 and table 1. |
| Study records:<br>Data management | 11a | Describe the mechanism(s) that will be used to manage records and data throughout the review                                                                                                                                  | Pages 8-9.          |

Peer review only

|                                    |     |                                                                                                                                                                                                                                                  |       |
|------------------------------------|-----|--------------------------------------------------------------------------------------------------------------------------------------------------------------------------------------------------------------------------------------------------|-------|
|                                    |     |                                                                                                                                                                                                                                                  | Pages |
| Selection process                  | 11b | State the process that will be used for selecting studies (such as two independent reviewers) through each phase of the review (that is, screening, eligibility and inclusion in meta-analysis)                                                  | 8-9   |
|                                    |     |                                                                                                                                                                                                                                                  | Pages |
| Data collection process            | 11c | Describe planned method of extracting data from reports (such as piloting forms, done independently, in duplicate), any processes for obtaining and confirming data from investigators                                                           | 8-9   |
|                                    |     |                                                                                                                                                                                                                                                  | Table |
| Data items                         | 12  | List and define all variables for which data will be sought (such as PICO items, funding sources), any pre-planned data assumptions and simplifications                                                                                          | 2.    |
|                                    |     |                                                                                                                                                                                                                                                  | Table |
| Outcomes and prioritization        | 13  | List and define all outcomes for which data will be sought, including prioritization of main and additional outcomes, with Rationale                                                                                                             | 2.    |
|                                    |     |                                                                                                                                                                                                                                                  | Pages |
| Risk of bias in individual studies | 14  | Describe anticipated methods for assessing risk of bias of individual studies, including whether this will be done at the outcome or study level, or both; state how this information will be used in data synthesis                             | 8-10  |
|                                    |     |                                                                                                                                                                                                                                                  | Pages |
| Data synthesis                     | 15a | Describe criteria under which study data will be quantitatively synthesised                                                                                                                                                                      | 8-10  |
|                                    | 15b | If data are appropriate for quantitative synthesis, describe planned summary measures, methods of handling data and methods of combining data from studies, including any planned exploration of consistency (such as $I^2$ , Kendall's $\tau$ ) |       |
|                                    | 15c | Describe any proposed additional analyses (such as sensitivity or subgroup analyses, meta-regression)                                                                                                                                            |       |
|                                    | 15d | If quantitative synthesis is not appropriate, describe the type of summary planned                                                                                                                                                               |       |
|                                    |     |                                                                                                                                                                                                                                                  | Pages |
| Meta-bias(es)                      | 16  | Specify any planned assessment of meta-bias(es) (such as publication bias across studies, selective reporting within studies)                                                                                                                    | 8-10  |
|                                    |     |                                                                                                                                                                                                                                                  | Page  |
| Confidence in cumulative evidence  | 17  | Describe how the strength of the body of evidence will be assessed (such as GRADE)                                                                                                                                                               | 10    |

**\* It is strongly recommended that this checklist be read in conjunction with the PRISMA-P Explanation and Elaboration (cite when available) for important clarification on the items. Amendments to a review protocol should be tracked and dated. The copyright for PRISMA-P (including checklist) is held by the PRISMA-P Group and is distributed under a Creative Commons Attribution Licence 4.0.**

*From: Shamseer L, Moher D, Clarke M, Ghersi D, Liberati A, Petticrew M, Shekelle P, Stewart L, PRISMA-P Group. Preferred reporting items for systematic review and meta-analysis protocols (PRISMA-P) 2015: elaboration and explanation. BMJ. 2015 Jan 2;349(jan02 1):g7647.*



# BMJ Open

## Protocol of a scoping review assessing injury rates and their determinants among healthcare workers in Western countries

|                                 |                                                                                                                                                                                                                                                                                                                                                                                                                                                                                                                                                                                                                                                                                                                                                                                                                                                                                                                                                                                                                                                                                                                                                                                                                                                                                                                                                                                                                                                                                                                                                                                                                                                                                                                                                                                                                                                                                                                                                                                                                                    |
|---------------------------------|------------------------------------------------------------------------------------------------------------------------------------------------------------------------------------------------------------------------------------------------------------------------------------------------------------------------------------------------------------------------------------------------------------------------------------------------------------------------------------------------------------------------------------------------------------------------------------------------------------------------------------------------------------------------------------------------------------------------------------------------------------------------------------------------------------------------------------------------------------------------------------------------------------------------------------------------------------------------------------------------------------------------------------------------------------------------------------------------------------------------------------------------------------------------------------------------------------------------------------------------------------------------------------------------------------------------------------------------------------------------------------------------------------------------------------------------------------------------------------------------------------------------------------------------------------------------------------------------------------------------------------------------------------------------------------------------------------------------------------------------------------------------------------------------------------------------------------------------------------------------------------------------------------------------------------------------------------------------------------------------------------------------------------|
| Journal:                        | <i>BMJ Open</i>                                                                                                                                                                                                                                                                                                                                                                                                                                                                                                                                                                                                                                                                                                                                                                                                                                                                                                                                                                                                                                                                                                                                                                                                                                                                                                                                                                                                                                                                                                                                                                                                                                                                                                                                                                                                                                                                                                                                                                                                                    |
| Manuscript ID                   | bmjopen-2018-023372.R4                                                                                                                                                                                                                                                                                                                                                                                                                                                                                                                                                                                                                                                                                                                                                                                                                                                                                                                                                                                                                                                                                                                                                                                                                                                                                                                                                                                                                                                                                                                                                                                                                                                                                                                                                                                                                                                                                                                                                                                                             |
| Article Type:                   | Protocol                                                                                                                                                                                                                                                                                                                                                                                                                                                                                                                                                                                                                                                                                                                                                                                                                                                                                                                                                                                                                                                                                                                                                                                                                                                                                                                                                                                                                                                                                                                                                                                                                                                                                                                                                                                                                                                                                                                                                                                                                           |
| Date Submitted by the Author:   | 30-Nov-2018                                                                                                                                                                                                                                                                                                                                                                                                                                                                                                                                                                                                                                                                                                                                                                                                                                                                                                                                                                                                                                                                                                                                                                                                                                                                                                                                                                                                                                                                                                                                                                                                                                                                                                                                                                                                                                                                                                                                                                                                                        |
| Complete List of Authors:       | <p>Bragazzi, Nicola; Department of Health Sciences (DISSAL), Postgraduate School of Occupational Medicine, University of Genoa<br/> Dini, Guglielmo; Department of Health Sciences (DISSAL), Postgraduate School of Occupational Medicine, University of Genoa; Occupational Medicine Unit, Policlinico San Martino Hospital<br/> Parodi, Valentina; Department of Health Sciences (DISSAL), Postgraduate School of Occupational Medicine, University of Genoa<br/> Blasi, Carlo; Liguria Regional Directorate, National Institution for Insurance Against Accidents at Work (INAIL)<br/> Linares, Roberta; Liguria Regional Directorate, National Institution for Insurance Against Accidents at Work (INAIL)<br/> Mortara, Virginia; Liguria Regional Directorate, National Institution for Insurance Against Accidents at Work (INAIL)<br/> Toletone, Alessandra; Department of Health Sciences (DISSAL), Postgraduate School of Occupational Medicine, University of Genoa; Occupational Medical Service, Local Health Unit 1, Liguria Regional Healthcare System<br/> Bersi, Francesca; Department of Health Sciences (DISSAL), Postgraduate School of Occupational Medicine, University of Genoa<br/> D'Amico, Beatrice; Department of Health Sciences (DISSAL), Postgraduate School of Occupational Medicine, University of Genoa; Occupational Medicine Unit, Policlinico San Martino Hospital<br/> Massa, Emanuela; Department of Health Sciences (DISSAL), Postgraduate School of Occupational Medicine, University of Genoa<br/> Montecucco, Alfredo; Department of Health Sciences (DISSAL), Postgraduate School of Occupational Medicine, University of Genoa; Occupational Medicine Unit, Policlinico San Martino Hospital<br/> Debarbieri, Nicoletta; Occupational Medicine Unit, Policlinico San Martino Hospital<br/> Durando, Paolo; Department of Health Sciences (DISSAL), Postgraduate School of Occupational Medicine, University of Genoa; Occupational Medicine Unit, Policlinico San Martino Hospital</p> |
| <b>Primary Subject Heading</b>: | Occupational and environmental medicine                                                                                                                                                                                                                                                                                                                                                                                                                                                                                                                                                                                                                                                                                                                                                                                                                                                                                                                                                                                                                                                                                                                                                                                                                                                                                                                                                                                                                                                                                                                                                                                                                                                                                                                                                                                                                                                                                                                                                                                            |
| Secondary Subject Heading:      | Epidemiology                                                                                                                                                                                                                                                                                                                                                                                                                                                                                                                                                                                                                                                                                                                                                                                                                                                                                                                                                                                                                                                                                                                                                                                                                                                                                                                                                                                                                                                                                                                                                                                                                                                                                                                                                                                                                                                                                                                                                                                                                       |
| Keywords:                       | healthcare workers, injuries, scoping review protocol                                                                                                                                                                                                                                                                                                                                                                                                                                                                                                                                                                                                                                                                                                                                                                                                                                                                                                                                                                                                                                                                                                                                                                                                                                                                                                                                                                                                                                                                                                                                                                                                                                                                                                                                                                                                                                                                                                                                                                              |

1  
2  
3  
4  
5  
6  
7  
8  
9  
10  
11  
12  
13  
14  
15  
16  
17  
18  
19  
20  
21  
22  
23  
24  
25  
26  
27  
28  
29  
30  
31  
32  
33  
34  
35  
36  
37  
38  
39  
40  
41  
42  
43  
44  
45  
46  
47  
48  
49  
50  
51  
52  
53  
54  
55  
56  
57  
58  
59  
60



SCHOLARONE™  
Manuscripts

Revised. To be submitted to *BMJ Open*

**Protocol of a scoping review assessing injury rates and their determinants among healthcare workers in Western countries**

Nicola Luigi Bragazzi<sup>1\*</sup>, Guglielmo Dini<sup>1,2\*</sup>, Valentina Parodi<sup>1</sup>, Carlo Blasi<sup>3</sup>, Roberta Linares<sup>3</sup>, Virginia Mortara<sup>3</sup>, Alessandra Toletone<sup>1,4</sup>, Francesca Bersi<sup>1</sup>, Beatrice D'Amico<sup>1,2</sup>, Emanuela Massa<sup>1</sup>, Alfredo Montecucco<sup>1,2</sup>, Nicoletta Debarbieri<sup>2</sup>, Paolo Durando<sup>1,2</sup>

<sup>1</sup>Department of Health Sciences (DISSAL), Postgraduate School of Occupational Medicine, University of Genoa, Italy

<sup>2</sup>Occupational Medicine Unit, Policlinico San Martino Hospital, Genoa, Italy

<sup>3</sup>Liguria Regional Directorate, National Institute for Insurance Against Accidents at Work/ Istituto nazionale per l'assicurazione contro gli infortuni sul lavoro (INAIL)

<sup>4</sup>Occupational Medical Service, Local Health Unit 1, Liguria Regional Healthcare System, Imperia, Italy

\* These authors contributed equally to this work.

\*Corresponding Author:

Prof. Dr. Paolo Durando, MD, PhD,

Department of Health Sciences (DISSAL), Postgraduate School of Occupational Medicine, University of Genoa and Occupational Medicine Unit, Policlinic San Martino Hospital, Genoa, Italy

Largo R. Benzi 10 (Building 3), 16132 Genoa, Italy

Phone: 0039 0103538133

Fax: 0039 010505618

E-mail: [durando@unige.it](mailto:durando@unige.it)

## ABSTRACT

**Introduction:** Healthcare workers (HCWs) are exposed to various risk factors and risky behaviors that may seriously affect their health and ability to work. The aim of this protocol is to detail the steps to follow in order to carry out a scoping review to assess the prevalence/incidence of injuries among HCWs.

**Methods and analysis:** The study will be carried out in accordance with the “Preferred Reporting Items for Systematic reviews and Meta-Analysis – Protocols” (PRISMA-P) guidelines. Studies will be selected according to the following criteria: P (HCWs), E (exposure to injuries), C (different types of exposure and different categories of HCWs) and O (prevalence/incidence and determinants of injuries). A time filter has been set (literature between 2000 and 2018) to enable updated, direct comparison between the findings and the epidemiological data available at national and local “Istituto Nazionale per l'Assicurazione contro gli Infortuni sul Lavoro” (National Institute for Insurance Against Accidents at Work, INAIL) Centers in Italy. No language restriction will be applied.

**Ethics and dissemination:** Formal ethical approval is not required; primary data will not be collected, as they have already been published. The results will be disseminated through peer-reviewed publication(s), conference presentation(s) and the press.

**Key terms:** healthcare workers; injuries; scoping review protocol

### Strengths and limitations of this study

- Current literature reports no reviews of studies performed in Western countries concerning injuries among healthcare workers.
- Stratifying injuries according to type and the work tasks involved could add meaningful information.
- A major limitation concerns the time filter (studies published between 2000 and 2018). However, this enables updated, direct comparison between the findings and the epidemiological data available at national and local "Istituto Nazionale per l'Assicurazione contro gli Infortuni sul Lavoro" (National Institute for Insurance Against Accidents at Work, INAIL) Centers.

## BACKGROUND

The healthcare system is the fastest-growing sector in Western countries and employs millions of workers: over 18 million in the United States and more than 59 million worldwide.<sup>1</sup> “Healthcare workers” (HCWs) is an umbrella term, which refers to all people engaged in the promotion, protection, care or improvement of the health of the population. This term includes a variety of different figures, ranging from medical doctors (such as specialists, pediatricians and general practitioners) to midwives and nurses, other allied health professionals, central supply workers and technicians, and residents.<sup>2-4</sup>

Several variables may constitute risk factors and impact on HCWs' health and safety, potentially leading to occupational injuries and diseases. These include: the individual characteristics of the HCWs (age, gender, education, smoking status, and other lifestyle habits) and the features of the patient under care (socio-demographic characteristics and type of disease) and of the healthcare setting (e.g. organization, workload, or night shifts) and procedures (such as invasive treatment).

Like other working environments, hospitals and other healthcare facilities are not completely safe workplaces for professionals. HCWs may be exposed to several occupational health hazards, which may impose a considerable clinical, economic and human burden. In Western countries, injury rates are higher among HCWs than among workers in any other field.<sup>5,6</sup> Some classic occupational hazards seem to re-emerge owing to societal changes, including biological hazards (such as HBV, HCV, HIV, measles, influenza, varicella and tuberculosis infections, among others).<sup>7-15</sup> These constitute a major occupational health problem, as most of them are blood-borne diseases, which can be acquired through needle-stick or sharps injuries (NSSI). HCWs have contact with infected patients and their body fluids. Moreover, they frequently perform exposure-prone procedures (EPPs) that may cause injury. This risk involves surgeons, midwives, microbiologists, pathologists, and blood bank and dialysis staff, among others. According to a recent review by Cooke and Stephens, in 2015 a needle-stick injury generated a cost of \$747 (range \$199-1,691).<sup>16</sup> Prüss-Ustün and collaborators used mathematical modeling to estimate the global burden of infections due to percutaneous injuries (PIs) among HCWs. Their model was based on the probability of injury, the prevalence of infection, the susceptibility of the worker and the potential of percutaneous transmission. In Western countries, 1,510 cases of HCV, 360 cases of HBV and 11 cases of HIV occurred in the year 2000, accounting for 8-27%, 1-8% and 0.5-3.1% of infections, respectively.<sup>17</sup> A recently published systematic review and meta-analysis of the literature performed by Auta and coworkers<sup>18</sup> computed a global one-year prevalence of PIs of 36.4% [95% confidence interval (CI) 32.9–40.0], ranging from 9.5% [95%CI 6.7–12.4] in Australasia to 15.7% [95%CI 12.1–19.3] in North America and to 31.8% [95%CI 25.0–38.5] in Europe. Incidence rates of sharps injuries

1  
2  
3 ranged from 1.4 to 9.5 per 100 HCWs, with a weighted mean of 3.7/100 HCWs *per* year and a  
4 related mean societal cost of €272.<sup>19</sup> According to Deuffic-Burban and colleagues,<sup>20</sup> the risk of  
5 transmission of blood-borne pathogen infections in susceptible HCWs – i.e. without post-exposure  
6 prophylaxis (PEP) or adequate hepatitis B vaccination - is estimated to be 30%, 0-0.5%, and <0.3%  
7 for HBV, HCV and HIV, respectively. In recent years, large measles outbreaks, with nosocomial  
8 transmission among HCWs, have been documented in Italy and the UK.<sup>21,22</sup>

9  
10  
11 The incidence of occupational exposure, and, therefore, of PIs can be reduced by adopting  
12 preventive measures, such as taking standard precautions or implementing training sessions  
13 targeting both long-term HCWs and students and residents at risk. For instance, in France, the  
14 proportion of PIs preventable by means of standard precautions decreased from 52.5% in 2004 to  
15 45.8% in 2008.<sup>20</sup>

16  
17 Other hazards are ergonomic/physical. Musculoskeletal injuries caused by patient handling and  
18 overexertion are among the most frequent traumas sustained by HCWs. Musculoskeletal injuries,  
19 which may involve muscles, nerves, tendons and ligaments, joints and cartilage, are due to such  
20 factors as repetitive movements, force, awkward postures, contact stress or vibration. Personnel  
21 assigned to hospital housekeeping, laundry and food services, maintenance, central supply and  
22 office tasks, as well as those involved in patient care, are susceptible to such injuries. Patient-  
23 handling injuries may be caused by manually lifting patients, who are generally more overweight or  
24 obese than in the past. Consequently, a "Safe Patient Handling – No Manual Lifting" policy should  
25 be adopted. This is especially important today, given the current shortage of HCWs, particularly of  
26 nurses, and the need to mobilize patients early and to assist them with physical activities.<sup>23,24</sup>  
27 According to some epidemiological surveys, up to two thirds of nurses have suffered from  
28 musculoskeletal disorders for at least 14 days at least once in their working lives.<sup>25</sup> Physiotherapists  
29 are also at high risk of developing musculoskeletal disorders: according to a recent comprehensive  
30 narrative review, their lifetime and yearly prevalence rates are 55-91% and 40-91.3%, respectively.  
31 Injuries generally affect the lower back, neck, upper back and shoulders.<sup>26</sup>

32  
33 Physical violence is another occupational hazard, and severely impacts on HCWs' well-being and  
34 job motivation, affecting health-care provision and quality.<sup>27</sup> According to World Health  
35 Organization (WHO) estimates, from 8% to 38% of HCWs have been assaulted by patients or  
36 visitors at least once in their careers. Recently, the WHO, the "International Labor Organization"  
37 (ILO), the "International Council of Nurses" (ICN) and the "Public Services International" (PSI)  
38 jointly drafted a document entitled "Framework guidelines for addressing workplace violence in the  
39 health sector".<sup>28</sup> The risk of physical violence is particularly high among HCWs working in  
40 psychiatric wards.<sup>29</sup> Indeed, according to a recent review of the literature, lifetime rates of overall  
41  
42  
43  
44  
45  
46  
47  
48  
49  
50  
51  
52  
53  
54  
55  
56  
57  
58  
59  
60

1  
2  
3 assaults, physical and verbal threats and sexual harassment in acute psychiatric units are 24-80%,  
4 46-78.6%, 43-78.6% and 9.5-37.2%, respectively. The complications of such episodes include  
5 fractures, eye injuries and permanent disability, as well as psychological symptoms such as anxiety,  
6 depression, post-traumatic stress disorder (PTSD) or avoidance behavior.<sup>30,31</sup> Another environment  
7 in which the risk of violence/assault is high is the emergency department (ED): according to a  
8 recent qualitative meta-synthesis, ED staff members perceive aggression as unavoidable and feel  
9 that they are too often left to handle it alone.<sup>32</sup> Aggressors typically suffer from psychiatric  
10 disorders, have a history of drug or alcohol use, carry weapons, are themselves victims of violence,  
11 and are unable to cope rationally with situational crises.<sup>33</sup> In recent years, the number of assaults  
12 against HCWs has risen. For example, in one university teaching hospital in northern Italy, non-  
13 fatal violent events increased from 20.65/10,000 in 2012 to 22.81/10,000 in 2014, resulting in 431  
14 days of absence from work and generating a direct cost of € 64,170. Up to 75% of violent episodes  
15 occurred in the ED, intermediate care, psychiatry and geriatrics wards.<sup>34</sup>

16  
17 A less common source of injury among HCWs is exposure to chemicals (inhalation of anesthetics,  
18 solvents, detergents or reagents)<sup>35</sup> or physical agents (such as ionizing and non-ionizing  
19 radiations).<sup>36</sup>

20  
21 A particular type of disorder is also known to affect shift workers. Research among shift and non-  
22 shift workers has revealed a strict, statistically significant relationship between shift work and  
23 excess daytime sleepiness.<sup>37-40</sup> Owing to workforce shortages, high workloads and the need to work  
24 at night, 32% of HCWs report not getting enough sleep.<sup>40</sup>

25  
26 Systematically identifying working conditions associated with exposure to health hazards and  
27 subsequently taking remedial action can play a major role in primary prevention.<sup>41</sup>

### 28 **Review objectives**

29  
30 The objectives of our planned study will be to: i) provide a comprehensive overview of all studies  
31 dealing with injuries among HCWs in Western countries; ii) identify the most frequent kinds of  
32 injuries among HCWs; iii) identify the type(s) of HWCs most prone to injuries; iv) identify which  
33 variable(s) impact(s) on the occurrence of injuries among HCWs; v) quantify the burden of injuries  
34 among HCWs in terms of related disabilities, residual working capability, absence from work and  
35 direct/indirect costs generated; vi) identify preventive measures that can effectively curb the  
36 occurrence of injuries among HCWs; and vii) disseminate review findings in the published  
37 literature on injuries among HCWs.

### 38 **Review questions**



1  
2  
3 The review questions of our planned study are: i) What is the incidence/prevalence rate of injuries  
4 among HCWs in Western countries? ii) What are the determinants of injuries among HCWs in  
5 Western countries? iii) What type of injury most commonly occurs among HCWs in Western  
6 countries? iv) Among the different professional figures within the umbrella term of HCWs, which  
7 one(s) is/are the most affected by injuries in Western countries? v) What is the burden imposed by  
8 injuries among HCWs in terms of related disabilities, residual working capability, absence from  
9 work and direct/indirect costs generated? vi) What are the state-of-art preventive measures that can  
10 be adopted in order to effectively reduce injuries among HCWs in Western countries?  
11  
12  
13  
14  
15  
16  
17

## 18 **METHODS**

### 19 **Study design**

20  
21  
22 In order to properly address the research questions, a scoping review will be performed by means of  
23 the 6-stage methodological framework initially proposed by Arksey and O'Malley.<sup>42</sup> This  
24 framework comprises 6 steps: namely, i) identifying the research question(s); ii) identifying relevant  
25 studies; iii) study selection; iv) charting the data; v) collating, summarizing and reporting the  
26 results; and vi) consultation exercise.<sup>43</sup> This conceptual scheme has been made more detailed and  
27 explicit by Levac, Colquhoun and O'Brien,<sup>44</sup> further refined by Colquhoun and collaborators,<sup>45</sup> and  
28 subsequently modified by the Joanna Briggs Institute (JBI) in the "JBI scoping review methods"  
29 manual.<sup>46</sup>  
30  
31  
32  
33  
34  
35

36 The specific methodology of the scoping review<sup>46,47</sup> was chosen in order to take into account both  
37 the nature and the specific requests of a national project co-funded and performed in collaboration  
38 between the Department of Health Sciences (DISSAL), Occupational Medicine - University of  
39 Genoa, Italy, and the National Institute for Insurance Against Accidents at Work (in Italian,  
40 "*Istituto Nazionale per l'Assicurazione contro gli Infortuni sul Lavoro*", INAIL). This objective  
41 requires the rapid assessment of a large amount of diverse scholarly literature, the aim being to  
42 achieve breadth rather than depth. For this reason, other types of review, such as systematic  
43 reviews, umbrella reviews or rapid reviews,<sup>48</sup> were not deemed methodologically effective.  
44  
45  
46  
47  
48

49 As maintained by Arksey and O'Malley,<sup>42</sup> scoping reviews may be utilized to assess the topology of  
50 a vast body of literature, in order to identify current gaps of knowledge and future prospects.<sup>42,49,50</sup>  
51 These aims corresponded to the objectives of our project.  
52  
53

### 54 **Drafting and registration of the study protocol**

55 This protocol is reported in accordance with the "Preferred Reporting Items for Systematic Reviews  
56 and Meta-Analysis – Protocols" (PRISMA – P) guidelines.<sup>51</sup> However, despite the recommendation  
57 of these guidelines, it was not possible to register the scoping review protocol in the "International  
58  
59  
60

Prospective Register of Systematic Reviews” (PROSPERO),<sup>52</sup> in that this register does not currently accept scoping review protocols.

### **Stage I: Identifying the research question(s)**

Five authors (NLB, GD, VM, AT, and PD) drafted the research questions; the other authors (VP, CB, RL, FB, BDA, EM, AM, and ND) helped to develop these questions. The research objectives and questions have been formulated as they are stated in the previous sections “Review objectives” and “Review questions”.

### **Stage II: Identifying relevant studies**

The identification of relevant studies will follow the three-step process recommended by the JBI: namely, i) preliminary search conducted on at least two databases; ii) preparation of a list of search terms and words to be used in the subsequent running of the search on a larger number of databases; and iii) possible additional searches (cross-checking/cross-referencing of reference lists of potentially eligible studies, hand-searching in target journals relevant to the topic, etc.).

#### *Preliminary literature search*

We carried out a preliminary literature search on the topic of interest in order to clarify inclusion/exclusion criteria. After familiarizing ourselves with the literature, we were able to further expand and/or modify/refine the search strategy with the help of an expert, qualified research librarian.

The preliminary literature search was carried out on two widely used scholarly databases (PubMed/MEDLINE and Scopus), using “healthcare injuries” as keywords and adopting a time filter; this yielded 27,844 and 139,073 studies, respectively. In the second stage, the research team inspected titles and abstracts of potentially relevant articles and prepared a list of pertinent words and index terms to inform the subsequent search process.

#### *Structured search strategy*

Based on the previously prepared list of key terms, a systematic literature search will be carried out on several scholarly databases, namely PubMed/MEDLINE (NLM), Scopus, SciVerse ScienceDirect, Science Citation Index Expanded (SCIE) and Social Sciences Citation Index (SSCI) from the ISI/Web of Science (WoS), ProQuest Research Library, ABI/INFORM, CBCA, *via* the UNO per TUTTI Primo Central (Ex Libris) platform databases.

1  
2  
3 We will include all studies reporting epidemiological figures of injuries among HCWs in Western  
4 countries in terms of prevalence/incidence rates. The search will be performed by using an  
5 appropriate string of relevant search terms based on controlled vocabulary and Boolean connectors  
6 (Table 1). For PubMed/MEDLINE, for instance, Medical Subject Headings (MeSH) key terms and  
7 wild card option (truncated key terms) will be utilized. This structured search strategy will be  
8 adapted to the other databases, in order to obtain database-specific search strategies. If a decision on  
9 the inclusion or exclusion of a study cannot be made on the basis of the abstract, the full text of the  
10 article will be examined. During this process, we will utilize the “Peer Review of Electronic Search  
11 Strategies (PRESS) 2015 Guideline statement” as a guide.<sup>53</sup>

12  
13  
14  
15  
16  
17  
18  
19 In the third phase of the search strategy, we will scan reference lists of the studies chosen and prior  
20 reviews. Additionally, we will hand-search target journals relevant to the topic under study.

21  
22  
23  
24 Five authors (NLB, GD, VM, AT and PD) will identify relevant studies, with the aid of the other  
25 authors (VP, CB, RL, FB, BDA, EM, AM, and ND).

### 26 27 28 **Stage III: Study selection**

29  
30  
31  
32  
33  
34  
35  
36  
37  
38  
39  
40  
41  
42  
43  
44  
45  
46  
47  
48  
49  
50  
51  
52  
53  
54  
55  
56  
57  
58  
59  
60  
Once the search strategy has been successfully completed, search results will be collated and  
exported to EndNote V.X7 (Clarivate Analytics). Duplicates will be automatically removed before  
the file containing a set of unique records is made available to reviewers for further processing (i.e.,  
study screening and selection).

The studies will be independently screened by two authors (NLB and GD), who will read study  
titles and abstracts for potential eligibility. Screening questions will be drafted and pilot-tested on a  
subset of records randomly chosen before implementation. Inter-rater agreement will be assessed by  
means of the  $\kappa$  statistic and any disagreement will be resolved through discussion; a third reviewer  
(PD), acting as a final referee, will be involved if necessary.

#### *Inclusion criteria*

Studies meeting the following PECO criteria will be considered for inclusion:<sup>54</sup>

- P (patient, problem or population): HCWs (of any type, medical, nursing or dental practitioners, trainees/residents, other allied health professionals, central supply workers and technicians) working in Western countries;
- E (exposure): injuries (of any type, due to exposure to biological, chemical, physical/ergonomic risks and hazards);

- C (comparison, control or comparator): different types of HCWs (medical *versus* nursing or dental practitioners, trainees or residents); exposed HCWs *versus* non-exposed; before and after a preventive program;
- O (outcome/outcomes of interest): prevalence/incidence and determinants of injuries, occupational burden (in terms of related disabilities and absence from work), and economic burden generated (in terms of direct and indirect costs).

Furthermore, the following criteria will be taken into consideration:

- Study design/characteristics: original articles, prevalence/incidence studies;
- Time: a time filter/restraint will be applied. Only papers written between 2000 and 2008 will be considered;
- Languages: no language filter/restraint will be applied. Non-English articles that are included will be acquired in full text and translated by expert translators from the University of Genoa, Italy.

#### *Exclusion criteria*

Articles that do not meet the above-stated PECO criteria, or which provide insufficient information, and studies designed as editorials, letters to the editor, commentaries, expert opinions, case reports, case series, and reviews will be excluded.

#### *Reporting the studies selected*

Details of the literature search and screening results will be both summarized narratively and presented graphically by means of the “Preferred Reporting Items for Systematic reviews and Meta-Analyses” (PRISMA) flow diagram (Figure 1).<sup>55</sup> In addition, we will provide a table of excluded studies, with reasons for their exclusion, in our published final scoping review.

#### **Stage IV: Charting the data**

An *ad hoc* data-extraction template reflecting the research questions and the purposes/objectives of the review will be created. This will be used both to confirm study relevance and to extract the data. In detail, the template will gather information regarding the key characteristics of the studies, such as study authors, year of publication, study population – type(s) of HCWs recruited – and study country, study design, percentage of male HCWs, mean age, sample size, attrition rate, years of professional experience, working setting, prevalence/incidence rate of injuries, knowledge, attitudes and practices concerning the adoption of standard procedures, and injury-related burden (Table 2)

1  
2  
3 These *a priori* data items have been individuated and developed through a preliminary exercise by  
4 all the research team.  
5  
6

7 The data-extraction process will be performed independently by two authors (NLB and GD) and  
8 will be pilot-tested on a small sample of randomly selected studies, until consensus is reached. On  
9 the basis of this pilot test, if deemed necessary by the research team, the data-extraction form will  
10 be reviewed and revised, in order to capture any relevant information contained in the studies  
11 included. Any change to the data-collection form will be documented and explained. To assist this  
12 process of the scoping review, the “Covidence” software (Cochrane) for systematic review  
13 management will be used.  
14  
15  
16  
17  
18  
19

### 20 **Stage V: Collating, summarizing and reporting the results**

21  
22 Stage V is aimed at providing a summary and synthesis of the findings. However, Levac et al.<sup>44</sup>  
23 have suggested breaking down this review step into the following three smaller and distinct phases:  
24 namely, a) data collation and analysis; b) reporting of the results and outcome(s) in such a way as to  
25 guide and inform the overall study purposes/objectives, and research questions; and c) taking into  
26 account the meaning of the findings in relation to the study purposes/objectives and research  
27 questions, and discussion of the potential, practical implications that the findings may have on  
28 future research, practice and policy.  
29  
30  
31  
32  
33  
34

35 The data collected during stage IV will be stored in an Excel electronic database. In addition to the  
36 narrative review describing how the results relate to the review purposes/objectives and questions,  
37 we will provide a table showing the main characteristics of the studies included in the scoping  
38 review. We will also assess the frequency of studies investigating: i) the type(s) of HCWs recruited,  
39 ii) the types of injuries, and iii) the outcome studied (injury rate and determinants; burden generated  
40 by the injuries; and preventive measures that can be adopted to curb the injury rate).  
41  
42  
43  
44  
45  
46

47 Findings will be reported according to the PRISMA Extension for Scoping Reviews (PRISMA –  
48 ScR) checklist.<sup>56</sup>  
49  
50

### 51 **Stage VI: Consultation exercise and stakeholder involvement**

52  
53 Both Arksey and O’Malley<sup>42</sup> and Levac et al.<sup>44</sup> have suggested that the consultation exercise stage  
54 can provide opportunities to involve key stakeholders, providing insights beyond those that can be  
55 found in the scholarly literature. The development of our planned scoping review will include the  
56 ongoing involvement of relevant scientific societies, such as the Italian Society of Occupational  
57 Medicine (“Società Italiana di Medicina del Lavoro”, SIML), and of the national and international  
58  
59  
60

1  
2  
3 networks of occupational physicians. Prior to publication and dissemination of the findings, we will  
4 once again consult with these stakeholders in order to receive their feedback and to ensure that the  
5 data have been clearly and accurately presented.  
6  
7

### 8 9 **Patient and public involvement**

10  
11 In the development of the planned scoping review, there will be no specific involvement of patients  
12 or the public.  
13  
14

## 15 16 17 **DISCUSSION**

### 18 19 **Implications**

20  
21  
22 HCWs are subject to various risk factors and risky behaviors, which may have a serious impact on  
23 their health and safety. Moreover, both non-fatal and fatal work-related injuries and illnesses  
24 impose an economic burden on society.<sup>57,58</sup> Thus, a major challenge for Western countries is to  
25 promote the health and well-being of individuals at both the occupational and community levels, in  
26 order to enable workers to stay at work longer and in good health.<sup>59,60</sup> Mapping the existing  
27 literature on injuries in the healthcare setting enables us to understand both traditional and emerging  
28 health problems at work (such as the impact of aging, musculoskeletal and psychosocial problems,  
29 shift work, gender perspectives, re-emergent infectious diseases) and provides useful insights into  
30 their determinants. This approach underpins the planning and implementation of high-quality  
31 occupational health interventions in the currently changing world of work.<sup>61</sup>  
32  
33

34  
35  
36 The proposed scoping review is expected to contribute to the existing scholarly literature through its  
37 potential to inform and influence healthcare practice, education and policy, and to guide future  
38 research in the field.  
39  
40

41  
42  
43 As yet, no reviews of studies conducted in Western countries concerning injuries among HCWs  
44 have been carried out. As such, this scoping review will provide the first rigorous analytical,  
45 updated synthesis of primary research data on the epidemiology and the economic and occupational  
46 burden of injuries among HCWs in Western countries. Stratifying injuries according to type and the  
47 work tasks involved could add meaningful information and increase our understanding of the  
48 determinants of injuries among HCWs.  
49  
50

51  
52  
53 Owing to the changing conditions of our society and of healthcare settings, new hazards are  
54 emerging alongside classic occupational risk factors, and ensuring health protection in the  
55 workplace is mandatory. Acquiring good evidence concerning the epidemiology of injuries and  
56  
57  
58  
59  
60



1  
2  
3 associated determinants among HCWs in Western countries is the scientific basis for implementing  
4 programs and properly orienting the activities of occupational health services and policies. This  
5 would bring considerable benefits not only to workers but to entire organizations and societies,  
6 which is an objective of occupational and public health programs.  
7  
8  
9

10  
11 Furthermore, this scoping review will allow us to assess the scholarly literature for knowledge gaps  
12 that researchers will be able to address in their future research. Being conducted in partnership with  
13 the INAIL and the national and international networks of occupational physicians, the planned  
14 scoping review will also be useful to decision- and policy-makers, in order to design, develop,  
15 implement and foster adequate, cost-effective *ad hoc* policies and practices for primary prevention  
16 and educational programs.  
17  
18  
19  
20  
21

### 22 *Strengths and limitations*

23  
24 The main strength of this scoping review lies in the rigor, transparency and reproducibility of our  
25 approach. Indeed, it will be based on the present scoping review protocol, which has been submitted  
26 separately for review and publication, in order to ensure high methodological standards. Any  
27 amendments to the present scoping review protocol will be precisely documented, listed and  
28 explained in the final review publication(s).  
29  
30  
31  
32

33  
34 Another strength is the multi-disciplinary nature of our team, which comprises an experienced  
35 epidemiologist and research methodologist (NLB), a biologist with a background in the field of  
36 public health (VP), occupational physicians from the academic setting (GD, AT, FB, BDA, EM,  
37 AM, ND, and PD), and occupational physicians with expertise in the field of social security and  
38 insurance (CB, RL, and VM).  
39  
40  
41  
42

43  
44 However, some shortcomings must also be mentioned. The main limitation concerns the time filter  
45 (studies published between 2000 and 2018 will be included in the scoping review). However, this  
46 will enable us to make an updated, direct comparison of the findings with the epidemiological  
47 figures available at national and local INAIL Centers. Moreover, as the process of scoping reviews  
48 does not include formal critical quality assessment and appraisal of the studies included, the  
49 findings reported may lack reliability and validity.  
50  
51  
52  
53

### 54 **Ethics**

55  
56  
57 No ethical clearance is required for the present scoping review protocol and for its subsequent  
58 implementation, in that it will summarize knowledge and analyze data that have been already  
59 collected and published.  
60

## Dissemination

Following the successful completion of the scoping review, its findings will be submitted to peer-reviewed journals for potential publication(s) and will be the subject of *ad hoc* oral/poster communication(s) in relevant national and international scientific congresses and conferences. All members of the research team have established relationships with national and international occupational medicine networks, which will also be used to further disseminate the review findings.

We will not be able to provide any recommendations, since the studies selected will not be critically and formally appraised for methodological quality. The findings of this scoping review could be used to guide the education of HCWs (for example, to inform the development and implementation of courses for continuous medical learning) and the health policy- and decision-making process.



## References

- 1) World Health Organization. Working Together for Health: World Health Report 2006. Geneva: Switzerland, 2006.
- 2) Joseph B, Joseph M. The health of the healthcare workers. *Indian J Occup Environ Med* 2016;20(2):71–72.
- 3) Adams BO, Dal Poz MR, Shengelia B, *et al.* Human, Physical, and Intellectual Resource Generation: Proposals for Monitoring. In Murray, C.J.L and Evans, D. (eds) Health Systems Performance Assessment: Debates, Methods and Empiricism. Geneva: World Health Organization: 273-287, 2003.
- 4) Diallo K, Zurn P, Gupta N, *et al.* Monitoring and evaluation of human resources for health: an international perspective. *Hum Resour Health* 2003;1(1):3.
- 5) Dressner MA. Hospital workers: an assessment of occupational injuries and illnesses. *Monthly Labor Review*, U.S. Bureau of Labor Statistics, June 2017.
- 6) Miller K. Risk factors and impacts of occupational injury in healthcare workers: A critical review. *OA Musculoskeletal Medicine* 2013 Mar 01;1(1):4.
- 7) Young TN, Arens FJ, Kennedy GE, *et al.* Antiretroviral post-exposure prophylaxis (PEP) for occupational HIV exposure. *Cochrane Database Syst Rev* 2007;(1):CD002835.
- 8) Rischitelli G, Harris J, McCauley L, *et al.* The risk of acquiring hepatitis B or C among public safety workers: a systematic review. *Am J Prev Med.* 2001 May;20(4):299-306.
- 9) Westermann C, Peters C, Lisiak B, *et al.* The prevalence of hepatitis C among healthcare workers: a systematic review and meta-analysis. *Occup Environ Med.* 2015 Dec;72(12):880-8.
- 10) Dini G, Toletone A, Sticchi L, *et al.* Influenza vaccination in healthcare workers: A comprehensive critical appraisal of the literature. *Hum Vaccin Immunother.* 2017 Aug 8:1-18.
- 11) Uden L, Barber E, Ford N, *et al.* Risk of Tuberculosis Infection and Disease for Health Care Workers: An Updated Meta-Analysis. *Open Forum Infect Dis.* 2017 Aug 29;4(3):ofx137.
- 12) Placidi D, Tonozzi B, Alessio L, Porru S. Tuberculin skin test (TST) survey among healthcare workers (HCWs) in hospital: a systematic review of the literature. *G Ital Med Lav Ergon.* 2007 Jul-Sep;29(3 Suppl):409-11.
- 13) Riccò M, Vezzosi L, Odone A, *et al.* Invasive Meningococcal Disease on the Workplaces: a systematic review. *Acta Biomed.* 2017 Oct 23;88(3):337-351.

- 14) van den Hoogen A, Duijn JM, Bode LGM, *et al.* Systematic review found that there was moderate evidence that vaccinating healthcare workers prevented pertussis in infants. *Acta Paediatr.* 2017, in press.
- 15) Leone Roberti Maggiore U, Scala C, *et al.* Susceptibility to vaccine-preventable diseases and vaccination adherence among healthcare workers in Italy: A cross-sectional survey at a regional acute-care university hospital and a systematic review. *Hum Vaccin Immunother.* 2017 Feb;13(2):470-476.
- 16) Cooke CE, Stephens JM. Clinical, economic, and humanistic burden of needlestick injuries in healthcare workers. *Med Devices (Auckl)* 2017;10:225-235.
- 17) Prüss-Ustün A, Rapiti E, Hutin Y. Estimation of the global burden of disease attributable to contaminated sharps injuries among health-care workers. *Am J Ind Med* 2005;48(6):482.
- 18) Auta A, Adewuyi EO, Tor-Anyiin A, *et al.* Global prevalence of percutaneous injuries among healthcare workers: a systematic review and meta-analysis. *Int J Epidemiol* 2018, in press..
- 19) Elseviers MM, Arias-Guillén M, Gorke A, *et al.* Sharps injuries amongst healthcare workers: review of incidence, transmissions and costs. *J Ren Care* 2014 Sep;40(3):150-6.
- 20) Deuffic-Burban S, Delarocque-Astagneau E, Abiteboul D, *et al.* Blood-borne viruses in health care workers: prevention and management. *J Clin Virol* 2011;52(1):4-10.
- 21) Baxi R, Mytton OT, Abid M, *et al.* Outbreak report: nosocomial transmission of measles through an unvaccinated healthcare worker-implications for public health. *J Public Health (Oxf)* 2014 Sep;36(3):375-81.
- 22) Amendola A, Bianchi S, Frati ER, *et al.* Ongoing large measles outbreak with nosocomial transmission in Milan, northern Italy, March-August 2017. *Euro Surveill* 2017 Aug 17;22(33).
- 23) Edlich RF, Hudson MA, Buschbacher RM, *et al.* Devastating injuries in healthcare workers: description of the crisis and legislative solution to the epidemic of back injury from patient lifting. *J Long Term Eff Med Implants* 2005;15(2):225-41.
- 24) Nelson AL, Collin J, Knibbe H, *et al.* Safer patient handling. *Nurs Manage* 2007;38(3):26-32.
- 25) Delloiacono N. Musculoskeletal safety for older adults in the workplace: review of current best practice evidence. *Workplace Health Saf* 2015;63(2):48-53.
- 26) Milhem M, Kalichman L, Ezra D, *et al.* Work-related musculoskeletal disorders among physical therapists: A comprehensive narrative review. *Int J Occup Med Environ Health.* 2016;29(5):735-47.

- 1
- 2
- 3 27) Dillon BL. Workplace violence: impact, causes, and prevention. *Work* 2012;42(1):15-20.
- 4
- 5 28) International Labour Office (ILO), International Council of Nurses (ICN), World Health
- 6 Organization (WHO), Public Services International (PSI). Joint Programme on Workplace
- 7 Violence in the Health Sector. Geneva, 2002.
- 8
- 9
- 10 29) Spaducci G, Stubbs B, McNeill A, Stewart D, Robson D. Violence in mental health settings:
- 11 A systematic review. *Int J Ment Health Nurs*. 2018 Feb;27(1):33-45.
- 12
- 13 30) d'Ettorre G, Pellicani V. Workplace Violence Toward Mental Healthcare Workers
- 14 Employed in Psychiatric Wards. *Saf Health Work* 2017;8(4):337-342.
- 15
- 16 31) Luftman K, Aydelotte J, Rix K, et al. PTSD in those who care for the injured. *Injury*. 2017
- 17 Feb;48(2):293-296.
- 18
- 19 32) Ashton RA, Morris L, Smith I. A qualitative meta-synthesis of emergency department staff
- 20 experiences of violence and aggression. *Int Emerg Nurs*. 2018, in press.
- 21
- 22 33) Gillespie GL, Gates DM, Miller M, et al. Workplace violence in healthcare settings: risk
- 23 factors and protective strategies. *Rehabil Nurs* 2010;35(5):177-84.
- 24
- 25 34) Sossai D, Molina FS, Amore M, et al. Analysis of incidents of violence in a large italian
- 26 hospital. *Med Lav*. 2017 Oct 27;108(5):6005.
- 27
- 28 35) Molina Aragonés JM, Ayora Ayora A, Barbara Ribalta A, et al. Occupational exposure to
- 29 volatile anaesthetics: a systematic review. *Occup Med (Lond)*. 2016 Apr;66(3):202-7.
- 30
- 31 36) Caciari T, Capozzella A, Tomei F, et al. Professional exposure to ionizing radiations in
- 32 health workers and white blood cells. *Ann Ig*. 2012 Nov-Dec;24(6):465-74.
- 33
- 34 37) Garbarino S, Traversa F, Spigno F, et al. Sleepiness, sleep disorders and risk of occupational
- 35 accidents. *G Ital Med Lav Ergon*. 2011 Jul-Sep;33(3 Suppl):207-11.
- 36
- 37 38) Garbarino S, Repice AM, Traversa F, et al. Commuting accidents: the influence of excessive
- 38 daytime sleepiness. A review of an Italian Police officers population. *G Ital Med Lav Ergon*
- 39 2007;29(3 Suppl):324-6.
- 40
- 41 39) Caruso CC. Negative impacts of shiftwork and long work hours. *Rehabil Nurs* 2014 Jan-
- 42 Feb;39(1):16-25.
- 43
- 44 40) Booker LA, Magee M, Rajaratnam SMW, et al. Individual vulnerability to insomnia,
- 45 excessive sleepiness and shift work disorder amongst healthcare shift workers. A systematic
- 46 review. *Sleep Med Rev*. 2018
- 47
- 48 41) Copello F, Garbarino S, Messineo A, et al. Occupational Medicine and Hygiene: applied
- 49 research in Italy. *J Prev Med Hyg* 2015;56(2):E102-10.
- 50
- 51 42) Arksey H, O'Malley L. Scoping studies: Towards a Methodological Framework. *Int J Soc*
- 52 *Res Methodol* 2005;8:19-32.
- 53
- 54
- 55
- 56
- 57
- 58
- 59
- 60

- 1
- 2
- 3 43) Khalil H, Peters M, Godfrey CM, et al. An Evidence-Based Approach to Scoping Reviews.
- 4 *Worldviews Evid Based Nurs* 2016;13(2):118-23. Levac D, Colquhoun H, O'Brien KK.
- 5 Scoping studies: advancing the methodology. *Implement Sci* 2010;5:69.
- 6
- 7
- 8 44) Colquhoun HL, Levac D, O'Brien KK, et al. Scoping reviews: time for clarity in definition,
- 9 methods, and reporting. *J Clin Epidemiol*. 2014 Dec;67(12):1291-4.
- 10
- 11 45) Tricco AC, Lillie E, Zarin W, et al. A scoping review on the conduct and reporting of
- 12 scoping reviews. *BMC Med Res Methodol* 2016;16:15.
- 13
- 14 46) Peters MD, Godfrey CM, Khalil H, et al. Guidance for conducting systematic scoping
- 15 reviews. *Int J Evid Based Healthc* 2015;13(3):141-146.
- 16
- 17 47) Grant MJ, Booth A. A typology of reviews: an analysis of 14 review types and associated
- 18 methodologies. *Health Info Libr J* 2009;26(2):91-108.
- 19
- 20 48) Mays N, Roberts E, Popay J. Synthesising research evidence. In N. Fulop, P. Allen, A.
- 21 Clarke, & N. Black (Eds.), *Studying the organisation and delivery of health services: Research methods* (pp. 188-219). London: Routledge, 2001.
- 22
- 23 49) Peterson J, Pearce PF, Ferguson LA, et al. Understanding scoping reviews: Definition,
- 24 purpose, and process. *J Am Assoc Nurse Pract* 2017;29(1):12-16.
- 25
- 26 50) Shamseer L, Moher D, Clarke M, et al. Preferred reporting items for systematic review and
- 27 meta-analysis protocols (PRISMA-P) 2015: elaboration and explanation. *BMJ*
- 28 2015;349(jan02 1):g7647.
- 29
- 30 51) Chien PF, Khan KS, Siassakos D. Registration of systematic reviews: PROSPERO. *BJOG*
- 31 2012;119(8):903-5.
- 32
- 33 52) McGowan J, Sampson M, Salzwedel DM, et al. PRESS Peer Review of Electronic Search
- 34 Strategies: 2015 Guideline Statement. *J Clin Epidemiol*. 2016 Jul;75:40-6.
- 35
- 36 53) Thabane L, Thomas T, Ye C, Paul J. Posing the research question: Not so simple. *Can J*
- 37 *Anaesth*. 2009;56:71-9.
- 38
- 39 54) Moher D, Liberati A, Tetzlaff J, et al. Preferred reporting items for systematic reviews and
- 40 meta-analyses: the PRISMA Statement. *Open Med* 2009;3(3):e123-30.
- 41
- 42 55) Tricco AC, Lillie E, Zarin W, et al. PRISMA Extension for Scoping Reviews (PRISMA-
- 43 ScR): Checklist and Explanation. *Ann Intern Med* 2018 Oct 2;169(7):467-473.
- 44
- 45 56) European Agency for Safety and Health at Work (EU-OSHA). The economics of
- 46 occupational safety and health - the value of OSH to society. 2017. Available from:
- 47 <https://visualisation.osha.europa.eu/osh-costs#!/>
- 48
- 49
- 50
- 51
- 52
- 53
- 54
- 55
- 56
- 57
- 58
- 59
- 60

- 1  
2  
3 57) Heuvel S, Zwaan L, Dam LV, *et al.* Estimating the costs of work-related accidents and ill-  
4 health: An analysis of European data sources. Luxembourg: European Agency for Safety  
5 and Health at Work (EU-OSHA), 2017.  
6  
7  
8 58) Burton J. WHO Healthy workplace framework and model: Background and supporting  
9 literature and practices. World Health Organization, 2010.  
10  
11 59) Westerholm P, Walters D. Supporting Health at Work: International Perspectives on  
12 Occupational Health Services. IOSH Services, 2007.  
13  
14  
15 60) Leijon O, Lindahl E, Torén K, *et al.* First-time decisions regarding work injury annuity due  
16 to occupational disease: a gender perspective. *Occup Environ Med* 2014 Feb;71(2):147-53.)  
17  
18 61) Steel J, Luyten J, Godderis L. Occupational Health: The Global Evidence and Value.  
19 Society of Occupational Medicine, International SOS Foundation, KU Leuven University,  
20 2018.  
21  
22  
23  
24  
25  
26  
27  
28  
29  
30  
31  
32  
33  
34  
35  
36  
37  
38  
39  
40  
41  
42  
43  
44  
45  
46  
47  
48  
49  
50  
51  
52  
53  
54  
55  
56  
57  
58  
59  
60

1  
2  
3 **Tables.**  
4

5 **Table 1. Planned search strategy.**  
6

| SEARCH STRATEGY ITEM | SEARCH STRATEGY                                                                                                                                                                                                                                                                                                                                                                                                                                                                                                                                                                                                                                                                                                                                                                                                                                                                                                                                                                                                                                                                                                                                                                                                                                                                                                                                                                                                                                                                                                                                                                                                                                                                                                                                                                                                                                                                          |
|----------------------|------------------------------------------------------------------------------------------------------------------------------------------------------------------------------------------------------------------------------------------------------------------------------------------------------------------------------------------------------------------------------------------------------------------------------------------------------------------------------------------------------------------------------------------------------------------------------------------------------------------------------------------------------------------------------------------------------------------------------------------------------------------------------------------------------------------------------------------------------------------------------------------------------------------------------------------------------------------------------------------------------------------------------------------------------------------------------------------------------------------------------------------------------------------------------------------------------------------------------------------------------------------------------------------------------------------------------------------------------------------------------------------------------------------------------------------------------------------------------------------------------------------------------------------------------------------------------------------------------------------------------------------------------------------------------------------------------------------------------------------------------------------------------------------------------------------------------------------------------------------------------------------|
| Databases            | PubMed/MEDLINE (NLM), Scopus, SciVerse ScienceDirect, Science Citation Index Expanded and Social Sciences Citation Index from ISI/Web of Science, ProQuest Research Library, ABI/INFORM, CBCA, <i>via</i> the UNO per TUTTI Primo Central (Ex Libris) platform                                                                                                                                                                                                                                                                                                                                                                                                                                                                                                                                                                                                                                                                                                                                                                                                                                                                                                                                                                                                                                                                                                                                                                                                                                                                                                                                                                                                                                                                                                                                                                                                                           |
| Language filter      | None                                                                                                                                                                                                                                                                                                                                                                                                                                                                                                                                                                                                                                                                                                                                                                                                                                                                                                                                                                                                                                                                                                                                                                                                                                                                                                                                                                                                                                                                                                                                                                                                                                                                                                                                                                                                                                                                                     |
| Time filter          | 2000-2018                                                                                                                                                                                                                                                                                                                                                                                                                                                                                                                                                                                                                                                                                                                                                                                                                                                                                                                                                                                                                                                                                                                                                                                                                                                                                                                                                                                                                                                                                                                                                                                                                                                                                                                                                                                                                                                                                |
| Spatial filter       | Western countries                                                                                                                                                                                                                                                                                                                                                                                                                                                                                                                                                                                                                                                                                                                                                                                                                                                                                                                                                                                                                                                                                                                                                                                                                                                                                                                                                                                                                                                                                                                                                                                                                                                                                                                                                                                                                                                                        |
| Keywords             | <p>1. "healthcare worker" OR "healthcare workers" OR "healthcare personnel" OR "healthcare staff" OR "health worker" OR "health workers" OR "health personnel" OR "health staff" OR physicians OR physician OR doctors OR doctor OR nurses OR nurse OR practitioners OR practitioner OR "medical students" OR "medical residents" OR "attending residents" OR "hospital technician" OR "hospital technicians" OR "paramedical personnel" OR "paramedical staff" OR "hospital support personnel"</p> <p>2. injury OR injuries OR incident OR incidents OR "occupational injury" OR "occupational injuries" OR "occupational incident" OR "occupational incidents" OR "work related injury" OR "work related injuries" OR "work related incident" OR "work related incidents" OR "workplace-induced injury" OR "workplace-induced injuries" OR "workplace-induced incident" OR "workplace-induced incidents" OR "occupational health hazard" OR "occupational health hazards"</p> <p>3. "exposure incidents" OR "splash exposures" OR "splash exposure" OR "needle-sticks" OR "sharp objects" OR "sharps" OR "percutaneous injuries" OR "percutaneous injury"</p> <p>4. "manual handling injury" OR "manual handling injuries" OR "musculoskeletal injury" OR "musculoskeletal injuries"</p> <p>5. "chemical occupational exposure" OR "exposure to inhaled anesthetic" OR "reagent exposure" OR "exposure to reagent" OR "exposure to solvents" OR "solvent exposure" OR "exposure to detergents" OR "detergent exposure"</p> <p>6. "slips, trips and falls" OR "slipping, tripping and falling accidents" OR "accidental fall" OR "same-level fall" OR "same-surface fall" OR "stump-and-fall" OR "step-and-fall" OR "forced-rotation-type fall" OR "fall from elevation"</p> <p>7. "violent events" OR "violence" OR "assault" OR "assaults"</p> <p>8. "cuts and wounds" OR "burns"</p> |



9. "motor vehicle accidents" OR "motor vehicle accident" OR "motor vehicle collisions" OR "motor vehicle collision" OR "motor vehicle crash" OR "motor vehicle crashes" OR "motor vehicle near crash" OR "motor vehicle near crashes"

10. "exposure to ionizing radiation" OR "radiation exposure"

1. AND 2. OR 3. OR 4. OR 5. OR 6. OR 7. OR 8. OR 9. OR 10.

Inclusion criteria

P: medical/paramedical students and residents, doctors and nurses, cleaners and porters

E: exposure to biological, chemical, physical/ergonomic risk and hazard

C: medical versus nursing or dental students; students versus residents; medical versus nursing or dental trainees/residents; exposed HCWs versus non-exposed; before and after a preventive program

O: prevalence/incidence of injuries and their determinants among healthcare workers in Western countries, related disabilities and absence from work, and economic burden generated (direct/indirect costs)

Study design: primary research

Exclusion criteria

Studies not meeting the above-stated PECO criteria

Study design: editorial, letter to the editor, commentary, case report, case series, review

Target journals

Occupational and public health journals

---

**Table 2. Data to be extracted and details/explanations.**

| EXTRACTED DATA                                   | DETAILS                                                                                                                                                                                                |
|--------------------------------------------------|--------------------------------------------------------------------------------------------------------------------------------------------------------------------------------------------------------|
| Study Reference                                  | Names and surnames of authors, year of publication                                                                                                                                                     |
| Study population                                 | Physicians, doctors, nurses, medical students, residents, cleaners, porters                                                                                                                            |
| Country                                          | Country or countries in which the study or studies was or were carried out                                                                                                                             |
| Study design                                     | Type of recruitment                                                                                                                                                                                    |
| M%                                               | Percentage of male healthcare workers                                                                                                                                                                  |
| Age                                              | Mean age of healthcare worker sample                                                                                                                                                                   |
| Sample number, attrition rate                    | Number of healthcare workers who took part in the survey, number of non-responders                                                                                                                     |
| Professional/experience years                    | Years spent in profession by healthcare workers included in the study                                                                                                                                  |
| Working setting                                  | Hospital ward where the injury occurred (e.g., emergency room, obstetrics department, surgery department, operating room, outpatient clinic, department of Internal Medicine, patient's room, CCU/ICU) |
| Injury prevalence/incidence rate                 | Prevalence/incidence rates stratified according to the kind of injury                                                                                                                                  |
| Method                                           | Questionnaire (validated, not validated)                                                                                                                                                               |
| Compliance with standard procedures              | Prevalence/incidence rates stratified according to the compliance with procedures and guidelines among the different types of healthcare workers                                                       |
| Knowledge, attitudes and practices regarding PEP | Prevalence/incidence rates stratified according to knowledge, attitudes and practices concerning PEP, among the different types of healthcare workers                                                  |
| Clerkship abroad                                 | Periods of training abroad; type of task(s) the healthcare worker was involved in during the training period abroad                                                                                    |



1  
2  
3 Reporting/non-reporting to Occupational  
4 Department

Prevalence/incidence rates stratified according  
5 to the determinants of reporting/non-reporting,  
6 among the different types of healthcare workers

7  
8 Injury-related burden

9 Number of days of absence from work,  
10 disabilities and direct/indirect economic costs  
11 due to injuries  
12

---

13 *Abbreviations: CCU (critical care unit), ICU (intensive care unit), PEP (post-exposure*  
14 *prophylaxis).*

15  
16  
17  
18  
19  
20  
21  
22  
23  
24  
25  
26  
27  
28  
29  
30  
31  
32  
33  
34  
35  
36  
37  
38  
39  
40  
41  
42  
43  
44  
45  
46  
47  
48  
49  
50  
51  
52  
53  
54  
55  
56  
57  
58  
59  
60

For peer review only

1  
2  
3  
4  
5  
6  
7  
8  
9  
10  
11  
12  
13  
14  
15  
16  
17  
18  
19  
20  
21  
22  
23  
24  
25  
26  
27  
28  
29  
30  
31  
32  
33  
34  
35  
36  
37  
38  
39  
40  
41  
42  
43  
44  
45  
46  
47  
48  
49  
50  
51  
52  
53  
54  
55  
56  
57  
58  
59  
60

Figures.

Figure 1. Flowchart of study selection in accordance with the “Preferred Reporting Items for Systematic Reviews and Meta-analyses” (PRISMA) guidelines.

For peer review only

## Contributors

NLB, GD, VP, CB, RL, VM, AT, FB, BDA, EM, AM, ND and PD conceived the idea. NLB, GD, VM, AT and PD drafted the research questions. NLB, GD and PD developed the study methods. VP, CB, RL, FB, BDA, EM, AM and ND aided in developing the research questions and study methods. All authors participated in drafting the article and in editing or revising it critically for important intellectual content; all authors gave final approval of the version to be submitted and any revised version.

## Funding

This research was co-funded by the "Istituto Nazionale per l'Assicurazione contro gli Infortuni sul Lavoro (INAIL, National Institute for Insurance Against Accidents at Work)" and the Department of Health Sciences, Occupational Medicine - University of Genoa, Italy.

## Competing interests

None declared.

## Patient consent

Not required.

1  
2  
3  
4  
5  
6  
7  
8  
9  
10  
11  
12  
13  
14  
15  
16  
17  
18  
19  
20  
21  
22  
23  
24  
25  
26  
27  
28  
29  
30  
31  
32  
33  
34  
35  
36  
37  
38  
39  
40  
41  
42  
43  
44  
45  
46  
47  
48  
49  
50  
51  
52  
53  
54  
55  
56  
57  
58  
59  
60



**PRISMA 2009 Flow Diagram**

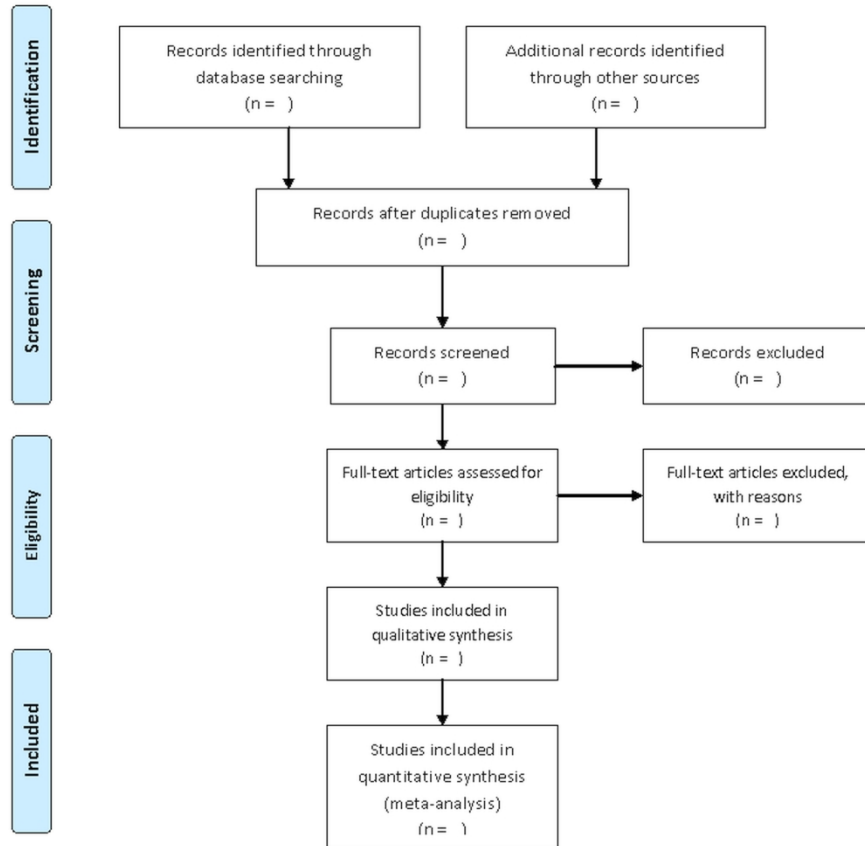

Flowchart of selection of studies according to the "Preferred Reporting Items for Systematic Reviews and Meta-analyses" (PRISMA) guidelines.

226x236mm (300 x 300 DPI)

**PRISMA-P (Preferred Reporting Items for Systematic review and Meta-Analysis Protocols) 2015 checklist: recommended items to address in a systematic review protocol\***

| Section and topic                 | Item No | Checklist item                                                                                                                                                                                  | Page of the documents and details                                                                                                                                                                                                                           |
|-----------------------------------|---------|-------------------------------------------------------------------------------------------------------------------------------------------------------------------------------------------------|-------------------------------------------------------------------------------------------------------------------------------------------------------------------------------------------------------------------------------------------------------------|
| <b>ADMINISTRATIVE INFORMATION</b> |         |                                                                                                                                                                                                 |                                                                                                                                                                                                                                                             |
| Title:                            |         |                                                                                                                                                                                                 |                                                                                                                                                                                                                                                             |
| Identification                    | 1a      | Identify the report as a protocol of a systematic review                                                                                                                                        | Protocol of a scoping review assessing injury rate and determinants among healthcare workers in Western countries (page 1)                                                                                                                                  |
| Update                            | 1b      | If the protocol is for an update of a previous systematic review, identify as such                                                                                                              |                                                                                                                                                                                                                                                             |
| Registration                      | 2       | If registered, provide the name of the registry (such as PROSPERO) and registration number                                                                                                      | In accordance with these guidelines, the scoping review protocol has been submitted to the International Prospective Register of Systematic Reviews (PROSPERO). However, currently, PROSPERO does not accept to register scoping review protocols (page 8). |
| Authors:                          |         |                                                                                                                                                                                                 |                                                                                                                                                                                                                                                             |
| Contact                           | 3a      | Provide name, institutional affiliation, e-mail address of all protocol authors; provide physical mailing address of corresponding author                                                       | Page 1 and page 21. Furthermore, role of each author is outlined in the protocol.                                                                                                                                                                           |
| Contributions                     | 3b      | Describe contributions of protocol authors and identify the guarantor of the review                                                                                                             |                                                                                                                                                                                                                                                             |
| Amendments                        | 4       | If the protocol represents an amendment of a previously completed or published protocol, identify as such and list changes; otherwise, state plan for documenting important protocol amendments | The present protocol is not an amendment.                                                                                                                                                                                                                   |
| Support:                          |         |                                                                                                                                                                                                 |                                                                                                                                                                                                                                                             |
| Sources                           | 5a      | Indicate sources of financial or other support for the review                                                                                                                                   | Sources and the role of the sponsor are indicated at page 7 and at page 21.                                                                                                                                                                                 |
| Sponsor                           | 5b      | Provide name for the review funder and/or sponsor                                                                                                                                               |                                                                                                                                                                                                                                                             |
| Role of sponsor or funder         | 5c      | Describe roles of funder(s), sponsor(s), and/or institution(s), if any, in developing the protocol                                                                                              |                                                                                                                                                                                                                                                             |
| <b>INTRODUCTION</b>               |         |                                                                                                                                                                                                 |                                                                                                                                                                                                                                                             |
| Rationale                         | 6       | Describe the rationale for the review in the context of what is already known                                                                                                                   | Rationale is provided in the background (pages 4-6).                                                                                                                                                                                                        |
| Objectives                        | 7       | Provide an explicit statement of the question(s) the review will                                                                                                                                | Page 7.                                                                                                                                                                                                                                                     |

address with reference to participants, interventions, comparators, and outcomes (PICO)

**METHODS**

|                                   |     |                                                                                                                                                                                                                               |                     |
|-----------------------------------|-----|-------------------------------------------------------------------------------------------------------------------------------------------------------------------------------------------------------------------------------|---------------------|
| Eligibility criteria              | 8   | Specify the study characteristics (such as PICO, study design, setting, time frame) and report characteristics (such as years considered, language, publication status) to be used as criteria for eligibility for the review | Page 8 and table 1. |
| Information sources               | 9   | Describe all intended information sources (such as electronic databases, contact with study authors, trial registers or other grey literature sources) with planned dates of coverage                                         | Page 8 and table 1. |
| Search strategy                   | 10  | Present draft of search strategy to be used for at least one electronic database, including planned limits, such that it could be repeated                                                                                    | Page 8 and table 1. |
| Study records:<br>Data management | 11a | Describe the mechanism(s) that will be used to manage records and data throughout the review                                                                                                                                  | Pages 8-9.          |

Peer review only

|                                    |     |                                                                                                                                                                                                                                                  |       |
|------------------------------------|-----|--------------------------------------------------------------------------------------------------------------------------------------------------------------------------------------------------------------------------------------------------|-------|
|                                    |     |                                                                                                                                                                                                                                                  | Pages |
| Selection process                  | 11b | State the process that will be used for selecting studies (such as two independent reviewers) through each phase of the review (that is, screening, eligibility and inclusion in meta-analysis)                                                  | 8-9   |
|                                    |     |                                                                                                                                                                                                                                                  | Pages |
| Data collection process            | 11c | Describe planned method of extracting data from reports (such as piloting forms, done independently, in duplicate), any processes for obtaining and confirming data from investigators                                                           | 8-9   |
|                                    |     |                                                                                                                                                                                                                                                  | Table |
| Data items                         | 12  | List and define all variables for which data will be sought (such as PICO items, funding sources), any pre-planned data assumptions and simplifications                                                                                          | 2.    |
|                                    |     |                                                                                                                                                                                                                                                  | Table |
| Outcomes and prioritization        | 13  | List and define all outcomes for which data will be sought, including prioritization of main and additional outcomes, with Rationale                                                                                                             | 2.    |
|                                    |     |                                                                                                                                                                                                                                                  | Pages |
| Risk of bias in individual studies | 14  | Describe anticipated methods for assessing risk of bias of individual studies, including whether this will be done at the outcome or study level, or both; state how this information will be used in data synthesis                             | 8-10  |
|                                    |     |                                                                                                                                                                                                                                                  | Pages |
| Data synthesis                     | 15a | Describe criteria under which study data will be quantitatively synthesised                                                                                                                                                                      | 8-10  |
|                                    | 15b | If data are appropriate for quantitative synthesis, describe planned summary measures, methods of handling data and methods of combining data from studies, including any planned exploration of consistency (such as $I^2$ , Kendall's $\tau$ ) |       |
|                                    | 15c | Describe any proposed additional analyses (such as sensitivity or subgroup analyses, meta-regression)                                                                                                                                            |       |
|                                    | 15d | If quantitative synthesis is not appropriate, describe the type of summary planned                                                                                                                                                               |       |
|                                    |     |                                                                                                                                                                                                                                                  | Pages |
| Meta-bias(es)                      | 16  | Specify any planned assessment of meta-bias(es) (such as publication bias across studies, selective reporting within studies)                                                                                                                    | 8-10  |
|                                    |     |                                                                                                                                                                                                                                                  | Page  |
| Confidence in cumulative evidence  | 17  | Describe how the strength of the body of evidence will be assessed (such as GRADE)                                                                                                                                                               | 10    |

**\* It is strongly recommended that this checklist be read in conjunction with the PRISMA-P Explanation and Elaboration (cite when available) for important clarification on the items. Amendments to a review protocol should be tracked and dated. The copyright for PRISMA-P (including checklist) is held by the PRISMA-P Group and is distributed under a Creative Commons Attribution Licence 4.0.**

*From: Shamseer L, Moher D, Clarke M, Ghersi D, Liberati A, Petticrew M, Shekelle P, Stewart L, PRISMA-P Group. Preferred reporting items for systematic review and meta-analysis protocols (PRISMA-P) 2015: elaboration and explanation. BMJ. 2015 Jan 2;349(jan02 1):g7647.*
